# Supplementary material for: Transcriptomic profiling with vascular tension analyses reveals molecular targets and phenotypes in preeclamptic placental vasculature
Source: Front Endocrinol (Lausanne). 2024 Nov 12;15:1487549. doi: 10.3389/fendo.2024.1487549 (PMC11588436; doi:10.3389/fendo.2024.1487549)
Supplement: Supplementary file 2 [file Table2.xlsx]

## Sheet: expression_and_statistics
Transcript_id	Gene_id	Gene_Symbol	RNA_type	Length	log2FoldChange	pvalue	padj	B11_normCounts	B25_normCounts	B28_normCounts	B30_normCounts	B7_normCounts	D10_normCounts	D26_normCounts	D8_normCounts	D9_normCounts	D_2_normCounts	B11	B25	B28	B30	B7	D10	D26	D8	D9	D_2	Max_expression_value	Expression_samples	Significance(FDR<0.05/|log2FC|<1)	High QC	Change
ENST00000084798.8	ENSG00000063180	CA11	Protein coding	8371	1.58638755687079	6.75400842568187e-05	0.00990294424686273	61.1676	39.5453	34.4477	30.0833	61.6302	188.04	130.712	101.573	69.4299	191.791	72	38	35	35	59	183	133	90	83	186	191.791	10	YES	YES	UP in Preeclampsia
ENST00000085219.9	ENSG00000012124	CD22	Protein coding	18169	-3.25600553261189	2.95176905068966e-06	0.000540997332551512	311.785	241.434	132.87	241.526	28.2036	11.3029	30.4667	4.51438	31.7872	21.6538	367	232	135	281	27	11	31	4	38	21	311.785	9	YES	YES	DOWN in Preeclampsia
ENST00000202773.13	ENSG00000089009	RPL6	Protein coding	4443	-3.3768474902134	0.000116742159009765	0.0160160099150088	813.019	3166.75	4249.86	125.49	355.157	130.498	372.48	115.117	152.244	68.0549	957	3043	4318	146	340	127	379	102	182	66	4249.86	10	YES	NO	DOWN in Preeclampsia
ENST00000215886.5	ENSG00000100079	LGALS2	Protein coding	9835	-7.54076138193237	1.51517545777925e-07	2.98702380943089e-05	96.8487	4.16266	34.4477	26.6452	8.35664	0	0	0	0	0	114	4	35	31	8	0	0	0	0	0	96.8487	3	YES	NO	DOWN in Preeclampsia
ENST00000217909.7	ENSG00000077713	SLC25A43	Protein coding	55419	-1.577776880986	0.00012306559754732	0.0167853706794234	1020.31	907.46	478.331	585.334	981.905	102.754	367.566	320.521	320.381	219.632	1201	872	486	681	940	100	374	284	383	213	1020.31	10	YES	YES	DOWN in Preeclampsia
ENST00000219919.8	ENSG00000103569	AQP9	Protein coding	47716	-2.11942197296482	5.83398049116803e-05	0.008662247814635	926.01	300.752	491.126	427.182	125.35	119.195	81.5722	81.2588	163.955	76.3039	1090	289	499	497	120	116	83	72	196	74	926.01	10	YES	YES	DOWN in Preeclampsia
ENST00000221307.12	ENSG00000186529	CYP4F3	Protein coding	21926	-2.99953455241612	0.000110362453055727	0.0152554724881359	105.344	121.758	100.39	30.0833	30.2928	10.2754	9.82797	0	6.69204	21.6538	124	117	102	35	29	10	10	0	8	21	121.758	7	YES	YES	DOWN in Preeclampsia
ENST00000221421.6	ENSG00000104826	LHB	Protein coding	1102	7.84761550816597	9.01407446804847e-06	0.0015598243213846	0	0	0	0	0	21.5783	17.6904	0	73.6125	88.6775	0	0	0	0	0	21	18	0	88	86	88.6775	4	YES	NO	UP in Preeclampsia
ENST00000233954.5	ENSG00000115602	IL1RL1	Protein coding	40536	-4.36432394876809	9.58838153514416e-05	0.0133893268617203	483.394	41.6266	23.6213	1101.05	331.132	13.358	41.2775	18.0575	23.4221	0	569	40	24	1281	317	13	42	16	28	0	1101.05	9	YES	NO	DOWN in Preeclampsia
ENST00000240618.10	ENSG00000213809	KLRK1	Protein coding	17666	-7.85479099082634	4.0856909470172e-06	0.000734878418332169	83.2559	21.854	0	183.078	28.2036	0	0.982797	0	0	0	98	21	0	213	27	0	1	0	0	0	183.078	4	YES	NO	DOWN in Preeclampsia
ENST00000245479.2	ENSG00000125398	SOX9	Protein coding	5401	-3.47736799415515	0.000163095108486337	0.021443676961897	1159.64	317.403	483.252	160.731	732.25	67.8177	3.93119	13.5431	158.099	12.3736	1365	305	491	187	701	66	4	12	189	12	1159.64	9	YES	YES	DOWN in Preeclampsia
ENST00000252595.11	ENSG00000130304	SLC27A1	Protein coding	35725	-1.0990937291713	7.62328397423954e-05	0.0109525848441091	561.553	1079.17	590.532	712.544	829.396	251.747	356.755	472.881	316.199	363.99	661	1037	600	829	794	245	363	419	378	353	1079.17	10	YES	YES	DOWN in Preeclampsia
ENST00000253188.8	ENSG00000130876	SLC7A10	Protein coding	17187	-2.88890775644633	0.000199685373571944	0.0252829087719641	66.2649	80.1312	59.0532	53.2904	50.1398	4.11016	1.96559	0	16.7301	18.5604	78	77	60	62	48	4	2	0	20	18	80.1312	7	YES	YES	DOWN in Preeclampsia
ENST00000259605.10	ENSG00000137075	RNF38	Protein coding	63821	5.84547277222057	1.94008521750629e-06	0.000361631003687228	25.4865	21.854	16.7317	8.59522	22.9807	4169.76	10.8108	902.875	6.69204	408.329	30	21	17	10	22	4058	11	800	8	396	4169.76	8	YES	NO	UP in Preeclampsia
ENST00000260049.9	ENSG00000137496	IL18BP	Protein coding	2910	-5.36805779043612	2.61355358478021e-05	0.00422018232630714	112.99	1068.76	176.175	8583.19	24.0253	24.661	22.6043	19.1861	158.099	16.4981	133	1027	179	9986	23	24	23	17	189	16	8583.19	10	YES	NO	DOWN in Preeclampsia
ENST00000261172.7	ENSG00000083782	EPYC	Protein coding	41348	-8.07050154662506	0.000224308880087818	0.0277794537483117	4.24775	5.20333	23.6213	7475.26	0	19.5233	5.89678	0	2.50952	0	5	5	24	8697	0	19	6	0	3	0	7475.26	3	YES	NO	DOWN in Preeclampsia
ENST00000261817.6	ENSG00000110801	PSMD9	Protein coding	29093	-1.01122336104364	0.00013186231967445	0.0177930701826613	265.909	216.458	193.891	214.021	265.323	163.379	91.4002	141.074	88.6695	89.7087	313	208	197	249	254	159	93	125	106	87	265.909	10	YES	YES	DOWN in Preeclampsia
ENST00000262850.7	ENSG00000083750	RRAGB	Protein coding	40464	-3.91461060883804	3.13722206402528e-07	6.11862628159268e-05	438.368	252.882	370.067	257.857	10.4458	11.3029	22.6043	25.9577	20.0761	8.24907	516	243	376	300	10	11	23	23	24	8	438.368	9	YES	YES	DOWN in Preeclampsia
ENST00000263512.5	ENSG00000126903	SLC10A3	Protein coding	3385	3.86397433998877	0.000128073396344001	0.0173530998356594	81.5568	81.1719	62.9901	90.2498	29.2482	82.2032	3150.85	1618.4	93.6886	82.4907	96	78	64	105	28	80	3206	1434	112	80	3150.85	10	YES	NO	UP in Preeclampsia
ENST00000263863.8	ENSG00000115523	GNLY	Protein coding	4564	-6.0337464704355	4.63200635589166e-05	0.00701714778368835	101.946	29.1386	54.1321	1949.4	29.2482	8.22032	19.6559	0	0	5.15567	120	28	55	2268	28	8	20	0	0	5	1949.4	6	YES	NO	DOWN in Preeclampsia
ENST00000264572.11	ENSG00000138698	RAP1GDS1	Protein coding	180687	5.57558932939717	0.000257193363332411	0.0309419631792834	0.84955	0	0	0	0	16.4406	0	14.6717	7.52855	23.7161	1	0	0	0	0	16	0	13	9	23	23.7161	3	YES	NO	UP in Preeclampsia
ENST00000265715.7	ENSG00000091137	SLC26A4	Protein coding	57175	-3.25801831346661	1.19197352214021e-05	0.00203053431388818	71.3622	144.653	839.54	248.402	1359	72.9554	51.1055	54.1725	61.9014	38.152	84	139	853	289	1301	71	52	48	74	37	1359	10	YES	NO	DOWN in Preeclampsia
ENST00000265849.11	ENSG00000122512	PMS2	Protein coding	35887	-3.73941306394905	1.56329176691663e-05	0.00263303228081553	242.122	1875.28	1272.6	2067.15	55.3627	51.377	188.697	29.3434	66.9204	76.3039	285	1802	1293	2405	53	50	192	26	80	74	2067.15	10	YES	YES	DOWN in Preeclampsia
ENST00000266070.8	ENSG00000101191	DIDO1	Protein coding	60215	-5.07337981004482	4.56161187775548e-07	8.8337120205336e-05	7082.7	4713.17	38.3846	5147.68	5097.55	19.5233	298.77	108.345	34.2967	194.884	8337	4529	39	5989	4880	19	304	96	41	189	7082.7	10	YES	YES	DOWN in Preeclampsia
ENST00000268349.7	ENSG00000140718	FTO	Protein coding	180434	5.80620892850246	2.62003704873406e-06	0.000482892529819315	3.3982	5.20333	6.88954	8.59522	4.17832	8.22032	6.87958	542.854	1013.01	11.3425	4	5	7	10	4	8	7	481	1211	11	1013.01	3	YES	NO	UP in Preeclampsia
ENST00000269373.10	ENSG00000141560	FN3KRP	Protein coding	11335	-1.59814370335369	0.000446894502121723	0.0486981561708196	280.352	258.085	763.755	666.13	450.214	199.343	146.437	81.2588	252.625	118.58	330	248	776	775	431	194	149	72	302	115	763.755	10	YES	YES	DOWN in Preeclampsia
ENST00000269576.5	ENSG00000186395	KRT10	Protein coding	4479	6.19286388014485	7.46674691831891e-05	0.0107559144336184	0	0	0.98422	19.769	0	36.9915	604.42	275.377	10.0381	602.182	0	0	1	23	0	36	615	244	12	584	604.42	6	YES	YES	UP in Preeclampsia
ENST00000273695.3	ENSG00000145107	TM4SF19	Protein coding	14838	-7.58623085519539	5.23334521586761e-06	0.000930096844869424	54.3712	52.0333	34.4477	35.2404	0	0	0	0	0	0	64	50	35	41	0	0	0	0	0	0	54.3712	4	YES	NO	DOWN in Preeclampsia
ENST00000273963.9	ENSG00000145332	KLHL8	Protein coding	60506	-2.00528758092195	4.03952454770562e-05	0.00621708193228792	861.444	1627.6	1745.02	1224.82	559.895	290.794	573.954	137.688	183.195	313.465	1014	1564	1773	1425	536	283	584	122	219	304	1745.02	10	YES	YES	DOWN in Preeclampsia
ENST00000274217.3	ENSG00000145569	FAM105A	Protein coding	30946	-1.79741328832904	0.000192943103567473	0.024676581449878	2425.47	898.094	951.741	2839	1153.22	462.393	471.743	314.878	842.361	286.655	2855	863	967	3303	1104	450	480	279	1007	278	2839	10	YES	YES	DOWN in Preeclampsia
ENST00000274289.7	ENSG00000145632	PLK2	Protein coding	6279	-3.24527413917548	1.30241593368617e-08	2.65359974935578e-06	3750.76	3405.06	2508.78	7373.84	2017.08	582.615	354.79	76.7444	496.048	499.069	4415	3272	2549	8579	1931	567	361	68	593	484	7373.84	10	YES	YES	DOWN in Preeclampsia
ENST00000275525.7	ENSG00000146678	IGFBP1	Protein coding	5312	-9.64109112256962	4.38060414662207e-07	8.49320013872471e-05	104.495	40.586	995.047	199761	56.4073	164.406	49.1399	0	13.3841	24.7472	123	39	1011	232410	54	160	50	0	16	24	199761	9	YES	NO	DOWN in Preeclampsia
ENST00000281523.7	ENSG00000151789	ZNF385D	Protein coding	339214	-6.11155188693489	1.26286778204438e-07	2.50163596419498e-05	10.1946	16.6506	15.7475	4.29761	16.7133	0	0	0	0	0	12	16	16	5	16	0	0	0	0	0	16.7133	4	YES	NO	DOWN in Preeclampsia
ENST00000285850.11	ENSG00000155465	SLC7A7	Protein coding	46575	-3.43420413404421	2.09287943125162e-05	0.00344032506948226	49.2739	22.8946	24.6055	57.588	4.17832	1.02754	0.982797	4.51438	5.01903	3.0934	58	22	25	67	4	1	1	4	6	3	57.588	4	YES	NO	DOWN in Preeclampsia
ENST00000290378.4	ENSG00000159251	ACTC1	Protein coding	8044	6.02733961316055	8.07305636958528e-05	0.0115382173272459	721.268	940.762	561.006	98.845	1983.66	607.276	382.308	276541	2919.4	372.239	849	904	570	115	1899	591	389	245031	3490	361	276541	10	YES	NO	UP in Preeclampsia
ENST00000291495.5	ENSG00000160161	CILP2	Protein coding	8395	-11.1332554900464	1.31812233527541e-06	0.000249090234354726	18.6901	34.342	64.9585	1940.8	0	0	0	0	0	0	22	33	66	2258	0	0	0	0	0	0	1940.8	4	YES	NO	DOWN in Preeclampsia
ENST00000291577.10	ENSG00000160221	C21orf33	Protein coding	12119	-5.2567302817515	2.87014204663542e-05	0.00458491232115151	4.24775	292.427	0.98422	20.6285	85.6555	1.02754	3.93119	1.12859	3.34602	1.03113	5	281	1	24	82	1	4	1	4	1	292.427	3	YES	NO	DOWN in Preeclampsia
ENST00000295683.2	ENSG00000163464	CXCR1	Protein coding	4151	-2.32072237853978	0.000264904676736637	0.0316609288241172	335.572	109.27	217.513	116.895	52.229	17.4682	58.9678	15.8003	17.5666	56.7124	395	105	221	136	50	17	60	14	21	55	335.572	10	YES	YES	DOWN in Preeclampsia
ENST00000295920.7	ENSG00000163655	GMPS	Protein coding	67061	-8.57680925755678	9.00436914635597e-07	0.000171540544370799	77.3091	148.815	0	45.5547	78.3435	0	0	0	0	0	91	143	0	53	75	0	0	0	0	0	148.815	4	YES	NO	DOWN in Preeclampsia
ENST00000296027.4	ENSG00000163735	CXCL5	Protein coding	3138	-4.91497834754793	2.02625002812797e-05	0.00334418821225245	36.5307	24.976	7.87376	32.6618	9.40122	0	0	0	3.34602	0	43	24	8	38	9	0	0	0	4	0	36.5307	3	YES	NO	DOWN in Preeclampsia
ENST00000296046.3	ENSG00000163751	CPA3	Protein coding	31941	-1.5629934815408	0.000156534356334173	0.0207471823474457	37.3802	35.3826	41.3373	52.4308	26.1145	12.3305	12.7764	10.1573	6.69204	23.7161	44	34	42	61	25	12	13	9	8	23	52.4308	9	YES	YES	DOWN in Preeclampsia
ENST00000296812.6	ENSG00000151876	FBXO4	Protein coding	9832	3.55623782749476	6.77842469067471e-05	0.00992672259818692	9.34505	4.16266	6.88954	7.7357	2.08916	138.718	5.89678	113.988	8.36505	90.7398	11	4	7	9	2	135	6	101	10	88	138.718	3	YES	NO	UP in Preeclampsia
ENST00000296932.12	ENSG00000112414	ADGRG6	Protein coding	144320	2.50996972673176	0.000285541516206904	0.0337103211419593	16724.2	4048.19	3143.6	1442.28	2912.29	27462	53125.1	11730.6	34657.2	34058.4	19686	3890	3194	1678	2788	26726	54055	10394	41431	33030	53125.1	10	YES	YES	UP in Preeclampsia
ENST00000296978.3	ENSG00000164484	TMEM200A	Protein coding	77330	-2.16179890521734	0.000380264638547198	0.0429892050816345	142.724	151.937	83.6587	171.045	74.1651	9.24786	44.2259	48.5295	5.85554	31.9652	168	146	85	199	71	9	45	43	7	31	171.045	8	YES	YES	DOWN in Preeclampsia
ENST00000297598.4	ENSG00000164951	PDP1	Protein coding	9208	-1.52835947789987	0.000430388450706759	0.0474027703542338	1440.84	1181.16	1107.25	893.043	1469.72	883.685	236.854	277.634	255.134	458.855	1696	1135	1125	1039	1407	860	241	246	305	445	1469.72	10	YES	YES	DOWN in Preeclampsia
ENST00000298892.9	ENSG00000110888	CAPRIN2	Protein coding	44962	6.27649165755749	0.000238335526541346	0.029186415732712	4.24775	0	0	0	0	0	29.4839	135.431	97.0346	77.3351	5	0	0	0	0	0	30	120	116	75	135.431	4	YES	NO	UP in Preeclampsia
ENST00000299367.9	ENSG00000166278	C2	Protein coding	18196	-1.69962109800992	5.48993664757648e-05	0.00819741642423733	2566.49	634.806	1153.51	1523.07	940.122	591.863	420.637	448.052	293.613	345.43	3021	610	1172	1772	900	576	428	397	351	335	2566.49	10	YES	YES	DOWN in Preeclampsia
ENST00000300108.7	ENSG00000166863	TAC3	Protein coding	6511	-9.64796325893381	0.00021370796293995	0.0266474519803134	0	122.799	38.3846	574.161	0	0	0	0	0	0	0	118	39	668	0	0	0	0	0	0	574.161	3	YES	NO	DOWN in Preeclampsia
ENST00000301407.7	ENSG00000267631	CGB1	Protein coding	1207	6.10260468465273	3.29109532973775e-05	0.00518175544447626	2.54865	1.04067	31.495	0	1.04458	5.1377	857.982	11.2859	567.987	1037.32	3	1	32	0	1	5	873	10	679	1006	1037.32	5	YES	NO	UP in Preeclampsia
ENST00000301408.6	ENSG00000189052	CGB5	Protein coding	1428	5.041739803913	1.74224792450065e-05	0.00291250708465341	1761.97	1310.2	736.197	26.6452	2121.54	13123.7	53045.5	103.831	40970.4	88959	2074	1259	748	31	2031	12772	53974	92	48978	86273	88959	10	YES	YES	UP in Preeclampsia
ENST00000302251.9	ENSG00000170962	PDGFD	Protein coding	257191	-3.33999460446472	0.000162846971000726	0.0214282082402221	120.636	251.841	841.508	1187	285.17	138.718	14.742	57.5583	50.1903	4.12454	142	242	855	1381	273	135	15	51	60	4	1187	9	YES	YES	DOWN in Preeclampsia
ENST00000303569.10	ENSG00000160741	CRTC2	Protein coding	10947	-5.33691955790113	0.000207590031414116	0.0259436984617681	386.545	84.2939	364.162	532.044	0	1.02754	0.982797	1.12859	0.836505	29.9029	455	81	370	619	0	1	1	1	1	29	532.044	5	YES	YES	DOWN in Preeclampsia
ENST00000304053.10	ENSG00000148053	NTRK2	Protein coding	208121	8.18459432669333	1.95292339473034e-05	0.00323617733638574	0	0	0	0	0	24.661	0	67.7156	6.69204	155.701	0	0	0	0	0	24	0	60	8	151	155.701	3	YES	NO	UP in Preeclampsia
ENST00000304567.9	ENSG00000171848	RRM2	Protein coding	8689	5.26031573113189	2.51800467418797e-07	4.94028305359378e-05	11.8937	1.04067	5.90532	0.859522	6.26748	129.47	37.3463	647.813	167.301	16.4981	14	1	6	1	6	126	38	574	200	16	647.813	6	YES	NO	UP in Preeclampsia
ENST00000305852.11	ENSG00000171055	FEZ2	Protein coding	38749	11.2259959859381	1.63849743746296e-05	0.0027540508923776	0	0	0	0	0	0	0	496.581	673.387	926.99	0	0	0	0	0	0	0	440	805	899	926.99	3	YES	NO	UP in Preeclampsia
ENST00000306482.1	ENSG00000172179	PRL	Protein coding	10251	-28.0036722275783	1.78683503710056e-24	2.93430476122579e-19	1.6991	0	49.211	10717.4	24.0253	0	0	0	0	0	2	0	50	12469	23	0	0	0	0	0	10717.4	3	YES	NO	DOWN in Preeclampsia
ENST00000309117.10	ENSG00000157538	DSCR3	Protein coding	44113	-1.12406771474769	1.89087073608966e-10	3.93555146437481e-08	1327.85	1491.27	1149.57	1254.9	1027.87	506.577	597.541	664.742	476.808	623.836	1563	1433	1168	1460	984	493	608	589	570	605	1491.27	10	YES	YES	DOWN in Preeclampsia
ENST00000313010.7	ENSG00000137509	PRCP	Protein coding	77096	-1.31505993928618	0.000188234700925731	0.0242253339471957	5691.99	4509.2	4256.75	10322.9	3385.48	2075.63	1969.53	1971.65	2350.58	2953.17	6700	4333	4325	12010	3241	2020	2004	1747	2810	2864	10322.9	10	YES	YES	DOWN in Preeclampsia
ENST00000313833.4	ENSG00000178974	FBXO34	Protein coding	82307	2.7070806658585	4.29750319836618e-05	0.00656826344245496	166.512	146.734	336.603	349.825	129.528	1648.17	119.901	1809.14	1888.83	1908.63	196	141	342	407	124	1604	122	1603	2258	1851	1908.63	10	YES	YES	UP in Preeclampsia
ENST00000317450.3	ENSG00000177151	OR2T35	Protein coding	972	-3.11029933898201	6.78231543141782e-05	0.00992672259818692	10.1946	21.854	42.3215	10.3143	21.9362	2.05508	2.94839	0	5.85554	1.03113	12	21	43	12	21	2	3	0	7	1	42.3215	5	YES	YES	DOWN in Preeclampsia
ENST00000319106.12	ENSG00000121749	TBC1D15	Protein coding	83465	-3.24769767341617	4.57110994484215e-05	0.00693232435660226	385.696	256.004	64.9585	58.4475	275.769	14.3856	67.813	6.77156	9.20156	11.3425	454	246	66	68	264	14	69	6	11	11	385.696	8	YES	YES	DOWN in Preeclampsia
ENST00000320239.11	ENSG00000105967	TFEC	Protein coding	95658	-2.47605496397016	0.000406935863280986	0.0454187440687678	176.706	610.871	142.712	743.486	78.3435	103.782	44.2259	25.9577	95.3616	45.3699	208	587	145	865	75	101	45	23	114	44	743.486	10	YES	NO	DOWN in Preeclampsia
ENST00000321925.8	ENSG00000141469	SLC14A1	Protein coding	28394	-4.32804391084569	9.06279020279586e-05	0.0127311657957462	395.041	39.5453	273.613	50.7118	25.0699	20.5508	3.93119	0	13.3841	1.03113	465	38	278	59	24	20	4	0	16	1	395.041	7	YES	NO	DOWN in Preeclampsia
ENST00000325686.6	ENSG00000179630	LACC1	Protein coding	14100	1.89866122939151	5.28622774138875e-05	0.00792779677840528	252.316	205.011	368.098	330.916	172.356	866.216	726.287	2122.89	807.227	433.076	297	197	374	385	165	843	739	1881	965	420	2122.89	10	YES	YES	UP in Preeclampsia
ENST00000325997.13	ENSG00000106012	IQCE	Protein coding	51222	-4.64737575958526	0.000405688331178301	0.0453823749110615	11.0442	52.0333	33.4635	0.859522	1.04458	1.02754	0.982797	0	0.836505	1.03113	13	50	34	1	1	1	1	0	1	1	52.0333	3	YES	NO	DOWN in Preeclampsia
ENST00000328619.9	ENSG00000183036	PCP4	Protein coding	62081	2.70436786045284	9.89858640565503e-06	0.00170034106941826	32.2829	20.8133	18.7002	23.2071	72.076	155.159	85.5034	525.925	182.358	139.203	38	20	19	27	69	151	87	466	218	135	525.925	10	YES	YES	UP in Preeclampsia
ENST00000328736.7	ENSG00000070778	PTPN21	Protein coding	84845	9.2346949784896	7.40724481381003e-13	2.38510378202795e-10	1.6991	1.04067	13.7791	2.57857	1.04458	1.02754	3148.88	5382.26	2698.57	892.962	2	1	14	3	1	1	3204	4769	3226	866	5382.26	5	YES	YES	UP in Preeclampsia
ENST00000332972.9	ENSG00000185100	ADSSL1	Protein coding	17577	-5.24920893322801	0.000122663364721043	0.016758346445724	6.7964	130.083	4.9211	111.738	124.305	2.05508	7.86238	0	0	0	8	125	5	130	119	2	8	0	0	0	130.083	3	YES	NO	DOWN in Preeclampsia
ENST00000334218.9	ENSG00000143776	CDC42BPA	Protein coding	327850	-5.77701192048828	3.83692446502211e-05	0.005933070261742	1773.01	7.28466	18.7002	2.57857	2846.48	23.6334	7.86238	13.5431	33.4602	6.18681	2087	7	19	3	2725	23	8	12	40	6	2846.48	6	YES	NO	DOWN in Preeclampsia
ENST00000335181.9	ENSG00000067225	PKM	Protein coding	32175	-3.51922500109275	5.98517170083734e-05	0.0088706942813006	2740.65	300.752	168.302	5512.11	544.226	144.883	90.4174	167.032	125.476	280.469	3226	289	171	6413	521	141	92	148	150	272	5512.11	10	YES	NO	DOWN in Preeclampsia
ENST00000335272.9	ENSG00000180957	PITPNB	Protein coding	67600	-3.86605200578231	7.59481853958049e-06	0.00132681479886471	372.952	1949.17	29.5266	465.861	1935.61	49.3219	58.9678	117.374	33.4602	67.0237	439	1873	30	542	1853	48	60	104	40	65	1949.17	10	YES	NO	DOWN in Preeclampsia
ENST00000336233.9	ENSG00000107798	LIPA	Protein coding	38490	-2.12390382828008	3.17271982033234e-10	6.5868230525327e-08	4102.48	4540.42	4569.73	8293.53	3797.05	796.344	1502.7	827.259	1121.75	1557.01	4829	4363	4643	9649	3635	775	1529	733	1341	1510	8293.53	10	YES	YES	DOWN in Preeclampsia
ENST00000336909.9	ENSG00000134352	IL6ST	Protein coding	41216	-2.51776405791099	9.26267491104524e-05	0.0129897348295647	25.4865	34.342	11.8106	16.3309	37.6049	4.11016	3.93119	2.25719	10.0381	1.03113	30	33	12	19	36	4	4	2	12	1	37.6049	6	YES	YES	DOWN in Preeclampsia
ENST00000337532.9	ENSG00000150054	MPP7	Protein coding	229150	3.88446177884391	0.000393381382892673	0.0441862544020991	12.7433	24.976	91.5325	5.15713	82.5218	87.3409	1341.52	1420.9	12.5476	339.243	15	24	93	6	79	85	1365	1259	15	329	1420.9	9	YES	NO	UP in Preeclampsia
ENST00000337539.11	ENSG00000128271	ADORA2A	Protein coding	14799	3.68419901986936	0.000445795672819562	0.0486753150259859	6.7964	1.04067	9.8422	0	2.08916	7.19278	31.4495	15.8003	152.244	47.4322	8	1	10	0	2	7	32	14	182	46	152.244	4	YES	NO	UP in Preeclampsia
ENST00000339113.8	ENSG00000197785	ATAD3A	Protein coding	22156	9.73836307992084	0.00011302079831845	0.0155966802170246	0	0	0	0	0	0	158.23	0	480.154	109.3	0	0	0	0	0	0	161	0	574	106	480.154	3	YES	NO	UP in Preeclampsia
ENST00000339907.8	ENSG00000188994	ZNF292	Protein coding	106340	-29.4078065072482	1.01215839954957e-23	6.66589896233154e-19	1696.55	0	0	18057.7	10261.9	0	0	0	0	0	1997	0	0	21009	9824	0	0	0	0	0	18057.7	3	YES	NO	DOWN in Preeclampsia
ENST00000340360.10	ENSG00000166435	XRRA1	Protein coding	108958	-1.88043701409925	0.000164600095455017	0.021589695267917	770.542	730.547	522.621	1601.29	265.323	347.309	142.506	199.761	180.685	186.635	907	702	531	1863	254	338	145	177	216	181	1601.29	10	YES	YES	DOWN in Preeclampsia
ENST00000340561.8	ENSG00000153093	ACOXL	Protein coding	155384	-3.7589254767476	0.000205857272968049	0.0258117434535616	1141.8	334.054	806.076	690.196	365.603	10.2754	205.405	6.77156	20.9126	3.0934	1344	321	819	803	350	10	209	6	25	3	1141.8	8	YES	YES	DOWN in Preeclampsia
ENST00000341773.10	ENSG00000012124	CD22	Protein coding	18187	-8.10591868422383	0.000116466889129001	0.0159916050158748	62.8667	1.04067	15.7475	172.764	0	0	0	0	0	0	74	1	16	201	0	0	0	0	0	0	172.764	3	YES	NO	DOWN in Preeclampsia
ENST00000342631.7	ENSG00000162804	SNED1	Protein coding	24084	-6.29390545107665	0.000253249325275046	0.0305794836014835	0	2.08133	29.5266	46.4142	29.2482	1.02754	0	0	0	0	0	2	30	54	28	1	0	0	0	0	46.4142	3	YES	NO	DOWN in Preeclampsia
ENST00000343625.11	ENSG00000105122	RASAL3	Protein coding	12948	-1.79628866939193	8.5020190355185e-05	0.0120568615023729	237.874	90.5379	189.955	271.609	130.572	97.6163	44.2259	29.3434	57.7189	36.0897	280	87	193	316	125	95	45	26	69	35	271.609	10	YES	YES	DOWN in Preeclampsia
ENST00000344722.5	ENSG00000113810	SMC4	Protein coding	34472	1.88310966413478	8.7166420549465e-06	0.00151154120905935	420.527	340.298	430.104	279.345	516.022	2082.82	1886.97	521.41	960.308	1874.6	495	327	437	325	494	2027	1920	462	1148	1818	2082.82	10	YES	YES	UP in Preeclampsia
ENST00000345330.8	ENSG00000156642	NPTN	Protein coding	73400	4.51624849947158	5.76182270040069e-05	0.0085628506806733	24.637	65.5619	68.8954	65.3237	31.3374	50.3495	1946.92	3740.16	41.8253	73.2105	29	63	70	76	30	49	1981	3314	50	71	3740.16	10	YES	NO	UP in Preeclampsia
ENST00000345985.7	ENSG00000115761	NOL10	Protein coding	119207	-5.01942099771623	5.39052200379897e-05	0.00806946893728222	298.192	48.9113	2.95266	405.694	106.547	1.02754	0.982797	1.12859	0.836505	22.685	351	47	3	472	102	1	1	1	1	22	405.694	5	YES	NO	DOWN in Preeclampsia
ENST00000347624.3	ENSG00000172061	LRRC15	Protein coding	14497	-4.76513141739794	0.0002729226062881	0.0324303940372063	817.267	36.4233	149.601	2456.51	16.7133	16.4406	28.5011	19.1861	63.5744	0	962	35	152	2858	16	16	29	17	76	0	2456.51	9	YES	NO	DOWN in Preeclampsia
ENST00000347735.10	ENSG00000082805	ERC1	Protein coding	500330	-4.56499927867035	0.000163838187954179	0.0215069380890962	11.0442	166.506	0.98422	183.078	5.2229	1.02754	3.93119	1.12859	4.18253	5.15567	13	160	1	213	5	1	4	1	5	5	183.078	3	YES	NO	DOWN in Preeclampsia
ENST00000349228.8	ENSG00000161955	TNFSF13	Protein coding	3125	-5.74938664594564	5.64686594534638e-06	0.00100034199764066	59.4685	147.775	84.6429	28.3642	2.08916	0	3.93119	0	0	2.06227	70	142	86	33	2	0	4	0	0	2	147.775	4	YES	NO	DOWN in Preeclampsia
ENST00000350110.2	ENSG00000134115	CNTN6	Protein coding	310934	-8.09090791520322	3.2958705858725e-06	0.000600045760388925	48.4244	31.22	0	53.2904	116.993	0	0	0	0	0	57	30	0	62	112	0	0	0	0	0	116.993	4	YES	NO	DOWN in Preeclampsia
ENST00000355468.7	ENSG00000141696	P3H4	Protein coding	10657	5.30117416360991	1.67007148884896e-06	0.000312008873442319	0.84955	2.08133	4.9211	17.1904	15.6687	85.2858	99.2625	1106.02	10.8746	304.185	1	2	5	20	15	83	101	980	13	295	1106.02	7	YES	NO	UP in Preeclampsia
ENST00000355540.7	ENSG00000196367	TRRAP	Protein coding	134754	2.75184631789837	2.84684556419207e-08	5.74328359779477e-06	853.798	1044.83	910.404	816.546	1056.07	7720.94	8735.1	6506.34	7484.21	1086.82	1005	1004	925	950	1011	7514	8888	5765	8947	1054	8735.1	10	YES	YES	UP in Preeclampsia
ENST00000355710.7	ENSG00000165731	RET	Protein coding	53325	-3.48671934554407	0.000330260078998635	0.0381665374053468	61.1676	57.2366	20.6686	330.056	63.7194	6.16524	4.91399	21.4433	15.0571	0	72	55	21	384	61	6	5	19	18	0	330.056	7	YES	NO	DOWN in Preeclampsia
ENST00000356508.9	ENSG00000105223	PLD3	Protein coding	29784	-5.71061464278483	3.64194171522538e-08	7.32034742461299e-06	93.4505	92.6192	6926.94	677.303	4398.72	84.2583	36.3635	45.1438	30.9507	36.0897	110	89	7038	788	4211	82	37	40	37	35	6926.94	10	YES	NO	DOWN in Preeclampsia
ENST00000356786.9	ENSG00000168071	CCDC88B	Protein coding	17312	-6.37044764270229	1.17013623198204e-05	0.0019974785004535	186.051	19.7726	9.8422	384.206	15.6687	0	0	6.77156	0.836505	0	219	19	10	447	15	0	0	6	1	0	384.206	4	YES	NO	DOWN in Preeclampsia
ENST00000357052.7	ENSG00000167578	RAB4B	Protein coding	18670	-5.09593972402566	6.58515125604759e-05	0.00966398899879914	597.234	2.08133	28.5424	61.8856	3.13374	1.02754	3.93119	7.90016	3.34602	4.12454	703	2	29	72	3	1	4	7	4	4	597.234	3	YES	NO	DOWN in Preeclampsia
ENST00000357383.4	ENSG00000104827	CGB3	Protein coding	1465	5.51659187807308	4.32076421796881e-06	0.000776309910663459	1219.1	1249.84	521.637	21.488	587.054	4516.04	43129.1	83.516	39571.7	77459.8	1435	1201	530	25	562	4395	43884	74	47306	75121	77459.8	10	YES	NO	UP in Preeclampsia
ENST00000357410.7	ENSG00000064655	EYA2	Protein coding	294221	-9.0845178707566	0.000221854373083625	0.0275794711877719	146.123	0	195.86	0	155.642	0	0	0	0	0	172	0	199	0	149	0	0	0	0	0	195.86	3	YES	NO	DOWN in Preeclampsia
ENST00000357475.8	ENSG00000157216	SSBP3	Protein coding	179304	-10.180917906891	0.000119925434643518	0.016411595855241	883.532	0	89.564	0	90.8784	0	0	0	0	0	1040	0	91	0	87	0	0	0	0	0	883.532	3	YES	NO	DOWN in Preeclampsia
ENST00000358308.7	ENSG00000213390	ARHGAP19	Protein coding	70498	-11.9261527890468	9.34722145830941e-10	1.92836936361891e-07	918.364	265.37	1266.69	0	1116.66	0	0	0	0	0	1081	255	1287	0	1069	0	0	0	0	0	1266.69	4	YES	NO	DOWN in Preeclampsia
ENST00000358704.4	ENSG00000179456	ZBTB18	Protein coding	6194	-3.29130778504222	0.000340208478732177	0.0391234985717372	286.298	21.854	636.791	41.2571	22.9807	18.4957	23.5871	24.8291	12.5476	23.7161	337	21	647	48	22	18	24	22	15	23	636.791	10	YES	NO	DOWN in Preeclampsia
ENST00000359342.6	ENSG00000104818	CGB2	Protein coding	1261	4.8986767023867	3.69613234763124e-05	0.00574239793626591	503.783	331.972	211.607	7.7357	405.297	2465.07	7900.71	24.8291	6483.75	26687.8	593	319	215	9	388	2399	8039	22	7751	25882	26687.8	9	YES	NO	UP in Preeclampsia
ENST00000359415.8	ENSG00000095139	ARCN1	Protein coding	30505	-3.34967578853338	0.000326305945289267	0.0378427328555881	87.5037	1997.04	650.57	55.8689	101.324	64.735	38.3291	88.0303	62.7379	29.9029	103	1919	661	65	97	63	39	78	75	29	1997.04	10	YES	NO	DOWN in Preeclampsia
ENST00000359576.9	ENSG00000163539	CLASP2	Protein coding	221965	-5.25855072076746	0.000321573171397356	0.0373466075392723	33.1325	50.9926	45.2741	3369.33	51.1844	38.019	0	37.2436	4.18253	13.4047	39	49	46	3920	49	37	0	33	5	13	3369.33	8	YES	NO	DOWN in Preeclampsia
ENST00000359761.7	ENSG00000115935	WIPF1	Protein coding	120680	-4.69711496147221	0.000407119750997005	0.0454187440687678	1010.12	42.6673	41.3373	1.71904	47.0061	2.05508	32.4323	2.25719	4.18253	3.0934	1189	41	42	2	45	2	33	2	5	3	1010.12	5	YES	NO	DOWN in Preeclampsia
ENST00000359863.8	ENSG00000196367	TRRAP	Protein coding	134754	2.15574384553981	5.84663880036012e-07	0.00011282295305729	1524.09	1899.21	1548.18	1231.69	1351.69	8229.57	8648.62	7578.51	7507.63	1699.31	1794	1825	1573	1433	1294	8009	8800	6715	8975	1648	8648.62	10	YES	YES	UP in Preeclampsia
ENST00000361339.9	ENSG00000187535	IFT140	Protein coding	23068	2.6264612897042	0.000348577969731513	0.0398904369570519	7.64595	10.4067	18.7002	12.0333	8.35664	25.6885	9.82797	54.1725	79.468	183.542	9	10	19	14	8	25	10	48	95	178	183.542	7	YES	NO	UP in Preeclampsia
ENST00000366581.6	ENSG00000119285	HEATR1	Protein coding	53834	-11.4327053897057	8.35551907364676e-10	1.72594544809575e-07	720.418	671.229	445.852	696.213	0	0	0	0	0	0	848	645	453	810	0	0	0	0	0	0	720.418	4	YES	NO	DOWN in Preeclampsia
ENST00000366621.7	ENSG00000135750	KCNK1	Protein coding	58509	-1.03446240246044	0.000115292889102468	0.0158569243405603	656.702	680.595	576.753	880.15	669.575	331.896	265.355	262.962	529.508	300.06	773	654	586	1024	641	323	270	233	633	291	880.15	10	YES	YES	DOWN in Preeclampsia
ENST00000367255.9	ENSG00000131018	SYNE1	Protein coding	515716	-10.0474561007765	0.000215836236739019	0.0268924090476542	0	0	2157.41	7958.31	779.256	0	0	0	0	10.3113	0	0	2192	9259	746	0	0	0	0	10	7958.31	4	YES	NO	DOWN in Preeclampsia
ENST00000367687.5	ENSG00000152061	RABGAP1L	Protein coding	289574	-4.26727863454699	2.95667659957463e-05	0.00470940366468425	2.54865	60.3586	28.5424	49.8523	21.9362	0	1.96559	0	4.18253	2.06227	3	58	29	58	21	0	2	0	5	2	60.3586	4	YES	NO	DOWN in Preeclampsia
ENST00000367806.7	ENSG00000117477	CCDC181	Protein coding	32548	7.10532944400047	4.57179315190798e-05	0.00693232435660226	0	0	0	0	0	38.019	35.3807	9.02875	0	38.152	0	0	0	0	0	37	36	8	0	37	38.152	3	YES	NO	UP in Preeclampsia
ENST00000367929.2	ENSG00000198574	SH2D1B	Protein coding	16861	-3.06994487159157	0.000159588212419789	0.0210838753557143	76.4595	23.9353	68.8954	129.788	16.7133	8.22032	0	14.6717	6.69204	8.24907	90	23	70	151	16	8	0	13	8	8	129.788	6	YES	YES	DOWN in Preeclampsia
ENST00000369101.7	ENSG00000148908	RGS10	Protein coding	27553	-2.96815750137616	6.10483704968813e-06	0.00107798293615665	434.12	42.6673	312.982	346.387	64.7639	24.661	32.4323	46.2724	27.6047	22.685	511	41	318	403	62	24	33	41	33	22	434.12	10	YES	YES	DOWN in Preeclampsia
ENST00000370597.7	ENSG00000095713	CRTAC1	Protein coding	165829	6.41612559350213	8.29801637118242e-05	0.0118288511496774	13.5928	5.20333	3.93688	11.1738	8.35664	10.2754	1.96559	3594.57	3.34602	3.0934	16	5	4	13	8	10	2	3185	4	3	3594.57	4	YES	NO	UP in Preeclampsia
ENST00000371026.7	ENSG00000152763	WDR78	Protein coding	112003	-2.50670174735515	1.10772732221236e-08	2.25973621613752e-06	229.379	97.8226	184.049	208.004	161.91	58.5698	33.4151	15.8003	17.5666	29.9029	270	94	187	242	155	57	34	14	21	29	229.379	10	YES	YES	DOWN in Preeclampsia
ENST00000371037.8	ENSG00000118473	SGIP1	Protein coding	214018	6.26975772426318	2.15565216648832e-06	0.000399996483024156	0	0	0	0	6.26748	50.3495	43.2431	286.663	36.8062	52.5878	0	0	0	0	6	49	44	254	44	51	286.663	5	YES	NO	UP in Preeclampsia
ENST00000371218.8	ENSG00000172456	FGGY	Protein coding	465744	4.96581077439049	5.72840340357437e-05	0.00852089628739289	2.54865	1.04067	1.96844	0	1.04458	3.08262	88.4518	98.1877	1.67301	15.467	3	1	2	0	1	3	90	87	2	15	98.1877	3	YES	NO	UP in Preeclampsia
ENST00000371246.6	ENSG00000095637	SORBS1	Protein coding	249605	8.33249458822866	6.35987384774828e-07	0.000122582836095015	33.982	56.1959	36.4162	43.8356	66.8531	55.4872	47.1743	76308.8	30.1142	40.2142	40	54	37	51	64	54	48	67614	36	39	76308.8	10	YES	NO	UP in Preeclampsia
ENST00000371247.6	ENSG00000095637	SORBS1	Protein coding	249605	5.67373831553614	8.79610071943282e-05	0.0123989533729083	37.3802	120.717	158.459	159.012	111.77	36.9915	150.368	29501.4	82.814	209.32	44	116	161	185	107	36	153	26140	99	203	29501.4	10	YES	NO	UP in Preeclampsia
ENST00000371789.7	ENSG00000160345	C9orf116	Protein coding	5338	-2.55836425067551	0.000450695878778742	0.0489823797625992	20.3892	23.9353	25.5897	37.819	14.6241	9.24786	7.86238	1.12859	2.50952	0	24	23	26	44	14	9	8	1	3	0	37.819	5	YES	YES	DOWN in Preeclampsia
ENST00000371825.7	ENSG00000131725	WDR44	Protein coding	103795	-11.3221221301927	1.63446415466253e-05	0.00275008641957347	822.364	979.266	0	0	545.271	0	0	0	0	0	968	941	0	0	522	0	0	0	0	0	979.266	3	YES	NO	DOWN in Preeclampsia
ENST00000372045.5	ENSG00000101938	CHRDL1	Protein coding	121910	-6.59951020037259	0.000431215659447971	0.0474302566398037	19.5397	26.0166	36.4162	20572.7	0	18.4957	37.3463	138.817	5.01903	13.4047	23	25	37	23935	0	18	38	123	6	13	20572.7	8	YES	NO	DOWN in Preeclampsia
ENST00000372141.6	ENSG00000185737	NRG3	Protein coding	1110332	9.15891047587874	5.52389631333122e-07	0.000106846078301841	0	0	0	0	0	0	39.3119	279.891	89.5061	91.771	0	0	0	0	0	0	40	248	107	89	279.891	4	YES	NO	UP in Preeclampsia
ENST00000372851.7	ENSG00000101098	RIMS4	Protein coding	58531	-7.58066880552346	0.00014426504084745	0.0192609077055988	15.2919	41.6266	89.564	694.494	0	0	0	4.51438	0	0	18	40	91	808	0	0	0	4	0	0	694.494	4	YES	NO	DOWN in Preeclampsia
ENST00000373266.8	ENSG00000142687	KIAA0319L	Protein coding	20603	5.65232026654849	3.28640874532383e-06	0.000598987204594439	2.54865	8.32532	12.7949	7.7357	31.3374	171.599	5.89678	15.8003	1335.9	1619.91	3	8	13	9	30	167	6	14	1597	1571	1619.91	6	YES	NO	UP in Preeclampsia
ENST00000373700.8	ENSG00000148634	HERC4	Protein coding	152860	-1.42304537433994	0.000147444554133222	0.0196694149396016	830.01	2687	1912.34	3172.5	1744.45	799.426	921.864	777.601	782.969	576.404	977	2582	1943	3691	1670	778	938	689	936	559	3172.5	10	YES	YES	DOWN in Preeclampsia
ENST00000373710.5	ENSG00000168528	SERINC2	Protein coding	25113	-9.59920170942521	4.84877414026811e-05	0.0073185293360896	3450.02	0	3440.83	5875.69	0	5.1377	0	0	0	11.3425	4061	0	3496	6836	0	5	0	0	0	11	5875.69	4	YES	NO	DOWN in Preeclampsia
ENST00000374114.7	ENSG00000244462	RBM12	Protein coding	15992	-2.02951800779584	6.99484586272925e-06	0.00122460511501671	3721.88	4550.83	3687.87	860.381	4717.32	1148.79	806.877	717.786	956.962	665.082	4381	4373	3747	1001	4516	1118	821	636	1144	645	4717.32	10	YES	YES	DOWN in Preeclampsia
ENST00000374282.7	ENSG00000158006	PAFAH2	Protein coding	38391	-1.40754621777404	0.000366723542663101	0.0417054063220562	3912.18	1273.77	2322.76	2316.41	1834.28	927.869	1154.79	753.901	447.53	1111.56	4605	1224	2360	2695	1756	903	1175	668	535	1078	3912.18	10	YES	YES	DOWN in Preeclampsia
ENST00000374601.7	ENSG00000204219	TCEA3	Protein coding	21227	-7.00117990248173	3.78048168834595e-05	0.00585394581308793	24.637	43.708	33.4635	0	15.6687	0	0	0	0	0	29	42	34	0	15	0	0	0	0	0	43.708	4	YES	NO	DOWN in Preeclampsia
ENST00000374792.6	ENSG00000181409	AATK	Protein coding	48775	8.94724405954627	3.67428234488307e-06	0.000665985980256079	0	0	0	0	0	27.7436	193.611	16.9289	0	193.853	0	0	0	0	0	27	197	15	0	188	193.853	4	YES	NO	UP in Preeclampsia
ENST00000375994.6	ENSG00000101306	MYLK2	Protein coding	15382	5.17227876472729	3.20265712739758e-05	0.00505219930976922	1.6991	0	0	0	0	4.11016	11.7936	31.6006	7.52855	15.467	2	0	0	0	0	4	12	28	9	15	31.6006	3	YES	NO	UP in Preeclampsia
ENST00000376083.7	ENSG00000135049	AGTPBP1	Protein coding	195280	4.79732556447955	1.69612089680236e-08	3.45146941054634e-06	1.6991	2.08133	2.95266	1.71904	2.08916	8.22032	33.4151	144.46	26.7682	79.3973	2	2	3	2	2	8	34	128	32	77	144.46	4	YES	NO	UP in Preeclampsia
ENST00000376089.6	ENSG00000204482	LST1	Protein coding	1856	-1.83410966235356	0.000444045907456938	0.0485165208454847	46.7253	27.0573	52.1637	16.3309	16.7133	7.19278	13.7592	10.1573	8.36505	5.15567	55	26	53	19	16	7	14	9	10	5	52.1637	7	YES	YES	DOWN in Preeclampsia
ENST00000376828.6	ENSG00000204632	HLA-G	Protein coding	4159	-10.7024834495304	3.49222212195284e-05	0.00546697552357342	0	400.656	338.572	788.182	0	0	0	0	0	0	0	385	344	917	0	0	0	0	0	0	788.182	3	YES	NO	DOWN in Preeclampsia
ENST00000376896.7	ENSG00000198963	RORB	Protein coding	195813	-8.90529432135504	0.000404697360940547	0.0453023798356747	6.7964	0	113.185	22976.7	0	18.4957	12.7764	16.9289	0	0	8	0	115	26732	0	18	13	15	0	0	22976.7	5	YES	NO	DOWN in Preeclampsia
ENST00000376991.6	ENSG00000175550	DRAP1	Protein coding	2114	9.28742889687464	2.76884297279938e-07	5.41947384156339e-05	0	0	0	0	0	0	52.0883	276.506	111.255	107.238	0	0	0	0	0	0	53	245	133	104	276.506	4	YES	NO	UP in Preeclampsia
ENST00000377091.6	ENSG00000078403	MLLT10	Protein coding	22681	2.17821307755143	0.000318211997573026	0.0370348248174679	21.2388	24.976	14.7633	20.6285	18.8024	25.6885	113.022	84.6445	29.2777	202.102	25	24	15	24	18	25	115	75	35	196	202.102	10	YES	NO	UP in Preeclampsia
ENST00000377602.4	ENSG00000148488	ST8SIA6	Protein coding	134457	2.41348319546774	0.000260156246872273	0.0311614431428672	129.981	27.0573	90.5483	19.769	43.8723	216.811	88.4518	584.612	335.439	434.108	153	26	92	23	42	211	90	518	401	421	584.612	10	YES	YES	UP in Preeclampsia
ENST00000377938.2	ENSG00000169605	GKN1	Protein coding	6402	-6.93916109229304	0.000144016567033284	0.0192433788487159	146.123	103.026	15.7475	271.609	0	0	0	4.51438	0	0	172	99	16	316	0	0	0	4	0	0	271.609	4	YES	NO	DOWN in Preeclampsia
ENST00000378036.5	ENSG00000148481	MINDY3	Protein coding	39839	-1.03745761950806	0.000397313283321676	0.0445669349457097	443.465	653.538	422.231	430.621	578.697	284.629	370.515	177.189	217.491	181.48	522	628	429	501	554	277	377	157	260	176	653.538	10	YES	YES	DOWN in Preeclampsia
ENST00000378142.8	ENSG00000171659	GPR34	Protein coding	8305	-2.04715884655997	7.08904832861087e-05	0.010311331606978	1286.22	248.719	929.104	969.541	901.472	103.782	271.252	364.536	175.666	134.047	1514	239	944	1128	863	101	276	323	210	130	1286.22	10	YES	YES	DOWN in Preeclampsia
ENST00000378324.6	ENSG00000149131	SERPING1	Protein coding	17158	-10.5879686627781	6.7921529976448e-09	1.38903335114226e-06	252.316	419.388	0	278.485	460.66	0	0	0	0	0	297	403	0	324	441	0	0	0	0	0	460.66	4	YES	NO	DOWN in Preeclampsia
ENST00000379016.7	ENSG00000110422	HIPK3	Protein coding	99437	3.96497658770454	2.20308483277291e-06	0.000408336551995826	439.217	439.161	424.199	392.802	396.94	434.65	11918.4	9661.89	10165.2	493.913	517	422	431	457	380	423	12127	8561	12152	479	11918.4	10	YES	YES	UP in Preeclampsia
ENST00000380172.8	ENSG00000099810	MTAP	Protein coding	64536	-3.71337378541649	0.000226571124890857	0.027996280652616	807.073	48.9113	774.581	16.3309	30.2928	12.3305	38.3291	24.8291	27.6047	24.7472	950	47	787	19	29	12	39	22	33	24	807.073	10	YES	NO	DOWN in Preeclampsia
ENST00000380375.4	ENSG00000137274	BPHL	Protein coding	33344	6.43791009124442	3.07357501268197e-05	0.00487197240765066	0	0	0.98422	0	0	41.1016	19.6559	23.7005	0	28.8718	0	0	1	0	0	40	20	21	0	28	41.1016	4	YES	NO	UP in Preeclampsia
ENST00000381086.9	ENSG00000146674	IGFBP3	Protein coding	9028	-5.14247093741903	9.04186911383658e-06	0.00156298701277475	7934.8	190.442	156.491	116.895	4614.95	143.856	78.6238	25.9577	109.582	10.3113	9340	183	159	136	4418	140	80	23	131	10	7934.8	10	YES	NO	DOWN in Preeclampsia
ENST00000381458.5	ENSG00000125780	TGM3	Protein coding	45078	-2.59266256539777	6.4110913084381e-05	0.00941696415464301	29.7343	12.488	30.5108	24.0666	9.40122	4.11016	5.89678	0	3.34602	4.12454	35	12	31	28	9	4	6	0	4	4	30.5108	4	YES	NO	DOWN in Preeclampsia
ENST00000382333.1	ENSG00000137440	FGFBP1	Protein coding	3172	-7.49394267210006	0.000135518828462223	0.0182265609929642	6.7964	24.976	27.5582	1412.19	5.2229	8.22032	0	0	0	0	8	24	28	1643	5	8	0	0	0	0	1412.19	3	YES	NO	DOWN in Preeclampsia
ENST00000382353.5	ENSG00000102678	FGF9	Protein coding	33116	3.82013982520732	2.72921612521403e-06	0.000501327084620131	30.5838	16.6506	23.6213	18.9095	20.8916	83.2308	57.985	731.329	49.3538	642.397	36	16	24	22	20	81	59	648	59	623	731.329	10	YES	NO	UP in Preeclampsia
ENST00000382899.8	ENSG00000147050	KDM6A	Protein coding	239422	2.34535757097873	8.42010628763048e-05	0.0119717144098883	85.8046	451.649	192.907	68.7618	413.653	647.35	1620.63	1607.12	1374.38	910.492	101	434	196	80	396	630	1649	1424	1643	883	1620.63	10	YES	YES	UP in Preeclampsia
ENST00000382989.7	ENSG00000196549	MME	Protein coding	10480	1.96488108032707	0.000171768116616905	0.0223690853089571	35.6811	11.4473	38.3846	40.3975	18.8024	190.095	154.299	45.1438	72.776	104.145	42	11	39	47	18	185	157	40	87	101	190.095	10	YES	YES	UP in Preeclampsia
ENST00000383096.7	ENSG00000166960	CCDC178	Protein coding	503287	-7.13960747600445	1.59353971123866e-09	3.28341159724204e-07	29.7343	6.24399	26.5739	45.5547	20.8916	0	0	0	0	0	35	6	27	53	20	0	0	0	0	0	45.5547	4	YES	NO	DOWN in Preeclampsia
ENST00000388887.6	ENSG00000136011	STAB2	Protein coding	179455	-5.45889587502515	3.97433489176268e-05	0.00612823781460548	73.9109	256.004	607.264	8847.06	27.1591	147.966	27.5183	11.2859	30.1142	6.18681	87	246	617	10293	26	144	28	10	36	6	8847.06	9	YES	NO	DOWN in Preeclampsia
ENST00000388925.8	ENSG00000160111	CPAMD8	Protein coding	133864	-6.49203006753321	5.19719608641757e-05	0.00781242273462011	68.8136	35.3826	33.4635	0	45.9615	2.05508	0	0	0	0	81	34	34	0	44	2	0	0	0	0	68.8136	4	YES	NO	DOWN in Preeclampsia
ENST00000389054.7	ENSG00000131504	DIAPH1	Protein coding	104040	7.25870887106421	3.90747300143376e-05	0.00603080264426174	111.291	8.32532	0.98422	0.859522	4.17832	1.02754	756.754	3164.58	1.67301	15334	131	8	1	1	4	1	770	2804	2	14871	15334	4	YES	NO	UP in Preeclampsia
ENST00000389202.2	ENSG00000156886	ITGAD	Protein coding	33194	-4.34001931779455	0.000350502915749255	0.040082790959966	185.202	38.5046	151.57	1090.73	15.6687	33.9088	7.86238	4.51438	26.7682	0	218	37	154	1269	15	33	8	4	32	0	1090.73	7	YES	NO	DOWN in Preeclampsia
ENST00000389256.8	ENSG00000163576	EFHB	Protein coding	37684	-7.59179431967588	1.84208894074088e-05	0.00305868717563788	12.7433	85.3346	24.6055	54.1499	0	0	0	0	0	0	15	82	25	63	0	0	0	0	0	0	85.3346	4	YES	NO	DOWN in Preeclampsia
ENST00000391958.6	ENSG00000159915	ZNF233	Protein coding	15395	-1.48436539403793	1.80357333157324e-05	0.00300689548593191	191.149	136.327	72.8323	97.126	178.623	38.019	49.1399	41.758	57.7189	54.6501	225	131	74	113	171	37	50	37	69	53	191.149	10	YES	YES	DOWN in Preeclampsia
ENST00000392038.6	ENSG00000105221	AKT2	Protein coding	55079	7.86231525738244	1.8305391616434e-07	3.60008958139827e-05	1.6991	1.04067	0.98422	0.859522	1.04458	146.938	35.3807	1.12859	1128.45	1.03113	2	1	1	1	1	143	36	1	1349	1	1128.45	3	YES	NO	UP in Preeclampsia
ENST00000392111.6	ENSG00000074582	BCS1L	Protein coding	3709	-6.937494684403	0.00016857499648533	0.0220056031580507	45.8757	43.708	2.95266	19.769	0	0	0	0	0	0	54	42	3	23	0	0	0	0	0	0	45.8757	3	YES	NO	DOWN in Preeclampsia
ENST00000392190.9	ENSG00000158793	NIT1	Protein coding	3076	-7.37196614829081	1.65966684599222e-05	0.00278678088052301	19.5397	35.3826	36.4162	0	60.5856	0	0	0	0	0	23	34	37	0	58	0	0	0	0	0	60.5856	4	YES	NO	DOWN in Preeclampsia
ENST00000392723.5	ENSG00000143442	POGZ	Protein coding	39481	2.85781543620769	0.000313242175944604	0.0365081644068637	116.388	158.181	139.759	95.4069	102.369	2684.96	132.678	1063.14	423.272	133.016	137	152	142	111	98	2613	135	942	506	129	2684.96	10	YES	NO	UP in Preeclampsia
ENST00000392746.7	ENSG00000143390	RFX5	Protein coding	4576	7.50231847825678	6.34972684957892e-11	1.33002480074509e-08	0.84955	1.04067	0.98422	5.15713	1.04458	1.02754	305.65	679.414	326.237	353.679	1	1	1	6	1	1	311	602	390	343	679.414	4	YES	NO	UP in Preeclampsia
ENST00000393249.6	ENSG00000091039	OSBPL8	Protein coding	207739	-5.3486399084437	0.00044644693080871	0.0486956399569606	3.3982	15.61	10.8264	49.8523	4668.23	48.2944	29.4839	6.77156	26.7682	5.15567	4	15	11	58	4469	47	30	6	32	5	4668.23	7	YES	NO	DOWN in Preeclampsia
ENST00000393399.6	ENSG00000137509	PRCP	Protein coding	76063	-1.50463250273331	0.00027640181304864	0.0327726735994379	176.706	88.4566	99.4063	254.419	86.7001	45.2118	57.0023	58.6869	31.7872	56.7124	208	85	101	296	83	44	58	52	38	55	254.419	10	YES	YES	DOWN in Preeclampsia
ENST00000393569.6	ENSG00000054983	GALC	Protein coding	59335	-11.0834087559184	2.6397506639296e-05	0.00424994680910971	196.246	0	0	1211.93	580.786	0	0	0	0	0	231	0	0	1410	556	0	0	0	0	0	1211.93	3	YES	NO	DOWN in Preeclampsia
ENST00000394056.6	ENSG00000137171	KLC4	Protein coding	15193	-9.90008362130298	9.50782489250123e-05	0.0133221500699383	0	275.776	0	152.995	447.08	0	0	0	0	0	0	265	0	178	428	0	0	0	0	0	447.08	3	YES	NO	DOWN in Preeclampsia
ENST00000394103.7	ENSG00000171475	WIPF2	Protein coding	60493	-11.5700103940293	1.08460390872286e-05	0.00185920130148905	981.23	803.394	0	1002.2	0	0	0	0	0	0	1155	772	0	1166	0	0	0	0	0	0	1002.2	3	YES	NO	DOWN in Preeclampsia
ENST00000394249.7	ENSG00000198901	PRC1	Protein coding	28458	2.55195553932953	4.57590236566923e-06	0.000819460779373467	37.3802	34.342	71.8481	18.05	22.9807	122.277	305.65	414.194	110.419	129.923	44	33	73	21	22	119	311	367	132	126	414.194	10	YES	YES	UP in Preeclampsia
ENST00000394426.5	ENSG00000172819	RARG	Protein coding	21690	-3.11710902497727	5.31384441722648e-05	0.00796194254113228	27.1856	49.9519	13.7791	42.9761	44.9169	1.02754	7.86238	10.1573	0.836505	1.03113	32	48	14	50	43	1	8	9	1	1	49.9519	6	YES	YES	DOWN in Preeclampsia
ENST00000394466.6	ENSG00000113580	NR3C1	Protein coding	122992	1.51565742254526	0.000197193982442888	0.0250835022531418	21.2388	29.1386	8.85798	16.3309	30.2928	58.5698	57.985	37.2436	61.0649	86.6153	25	28	9	19	29	57	59	33	73	84	86.6153	9	YES	YES	UP in Preeclampsia
ENST00000394595.7	ENSG00000164093	PITX2	Protein coding	19591	10.0662805848483	2.24464464537404e-08	4.54514247070325e-06	0	0	0	0	0	171.599	154.299	363.407	249.279	0	0	0	0	0	0	167	157	322	298	0	363.407	4	YES	NO	UP in Preeclampsia
ENST00000394714.6	ENSG00000164659	KIAA1324L	Protein coding	65031	5.13491180975968	0.000155724406073153	0.0206882850984005	1.6991	1.04067	7.87376	0.859522	5.2229	216.811	346.928	1.12859	18.4031	1.03113	2	1	8	1	5	211	353	1	22	1	346.928	3	YES	NO	UP in Preeclampsia
ENST00000395626.5	ENSG00000072134	EPN2	Protein coding	53737	-10.3069222446482	8.82805695605126e-05	0.0124333263911563	0	0	725.37	382.487	53.2736	0	0	0	0	0	0	0	737	445	51	0	0	0	0	0	725.37	3	YES	NO	DOWN in Preeclampsia
ENST00000396331.5	ENSG00000104972	LILRB1	Protein coding	20371	-8.55482667229207	1.40238979482943e-06	0.000264102806568005	139.326	24.976	79.7218	100.564	0	0	0	0	0	0	164	24	81	117	0	0	0	0	0	0	139.326	4	YES	NO	DOWN in Preeclampsia
ENST00000396625.3	ENSG00000081052	COL4A4	Protein coding	161403	-5.21678574144966	2.66001696825931e-05	0.00427419438839147	159.715	79.0906	272.629	3867.85	687.333	54.4596	49.1399	0	28.4412	4.12454	188	76	277	4500	658	53	50	0	34	4	3867.85	8	YES	NO	DOWN in Preeclampsia
ENST00000396787.5	ENSG00000198722	UNC13B	Protein coding	242174	4.30638668286597	0.00015127141482153	0.0201308664498882	0	2.08133	1.96844	1.71904	2.08916	34.9364	75.6754	2.25719	1.67301	39.1831	0	2	2	2	2	34	77	2	2	38	75.6754	3	YES	NO	UP in Preeclampsia
ENST00000397843.6	ENSG00000196914	ARHGEF12	Protein coding	152859	-1.87736247936436	0.000329369919639775	0.0380904714531018	965.938	5535.3	935.009	2826.97	3885.84	720.306	778.376	829.517	745.326	777.475	1137	5319	950	3289	3720	701	792	735	891	754	5535.3	10	YES	YES	DOWN in Preeclampsia
ENST00000397854.7	ENSG00000160255	ITGB2	Protein coding	34903	-7.63075135311001	4.94940693078079e-06	0.000880586898547085	4.24775	15.61	46.2584	203.707	1.04458	0	0	0	0.836505	0	5	15	47	237	1	0	0	0	1	0	203.707	3	YES	NO	DOWN in Preeclampsia
ENST00000397958.5	ENSG00000168824	HGNC:18790	Protein coding	32803	-8.58264713683264	1.39812135179295e-06	0.000263601253902107	125.733	0	138.775	28.3642	58.4965	0	0	0	0	0	148	0	141	33	56	0	0	0	0	0	138.775	4	YES	NO	DOWN in Preeclampsia
ENST00000398499.5	ENSG00000173276	ZBTB21	Protein coding	21730	-2.43159130689386	3.46015625743059e-05	0.00542712454902327	423.076	231.028	353.335	321.461	72.076	27.7436	110.073	22.5719	52.6998	46.401	498	222	359	374	69	27	112	20	63	45	423.076	10	YES	YES	DOWN in Preeclampsia
ENST00000398659.8	ENSG00000032389	EIPR1	Protein coding	188906	-4.64545116799081	3.18643469682484e-05	0.00503144166387674	299.891	4.16266	186.018	2.57857	29.2482	5.1377	5.89678	3.38578	3.34602	3.0934	353	4	189	3	28	5	6	3	4	3	299.891	3	YES	NO	DOWN in Preeclampsia
ENST00000398873.4	ENSG00000161179	YDJC	Protein coding	1869	-6.95629757682273	2.14516130121739e-05	0.00351922176386931	23.7874	27.0573	28.5424	34.3809	0	0	0	0	0	0	28	26	29	40	0	0	0	0	0	0	34.3809	4	YES	NO	DOWN in Preeclampsia
ENST00000399121.9	ENSG00000134769	DTNA	Protein coding	298487	8.21799627653894	2.17745911689758e-05	0.00356508455891014	0	0	0.98422	0	1.04458	51.377	0	490.938	0.836505	37.1208	0	0	1	0	1	50	0	435	1	36	490.938	3	YES	NO	UP in Preeclampsia
ENST00000399703.5	ENSG00000180071	ANKRD18A	Protein coding	49303	-4.30155626159707	5.93833797548435e-05	0.00880923202943171	46.7253	238.312	106.296	1004.78	4.17832	14.3856	3.93119	9.02875	30.1142	13.4047	55	229	108	1169	4	14	4	8	36	13	1004.78	7	YES	NO	DOWN in Preeclampsia
ENST00000400445.7	ENSG00000172915	NBEA	Protein coding	730449	3.71704366648243	0.000415023959486517	0.0460191793240762	120.636	491.194	132.87	40.3975	205.782	997.742	270.269	10609.9	217.491	933.177	142	472	135	47	197	971	275	9401	260	905	10609.9	10	YES	NO	UP in Preeclampsia
ENST00000401392.5	ENSG00000121988	ZRANB3	Protein coding	333763	3.46491724927002	0.000460587420603666	0.049855655190617	56.9199	48.9113	2.95266	0	13.5795	121.25	273.218	222.333	393.157	341.305	67	47	3	0	13	118	278	197	470	331	393.157	8	YES	YES	UP in Preeclampsia
ENST00000402191.5	ENSG00000084710	EFR3B	Protein coding	112912	3.50029473674077	0.000251298429921993	0.0304109989424686	3.3982	3.122	0.98422	0	3.13374	39.0465	5.89678	10.1573	56.8824	7.21794	4	3	1	0	3	38	6	9	68	7	56.8824	3	YES	NO	UP in Preeclampsia
ENST00000402198.5	ENSG00000168137	SETD5	Protein coding	80436	4.54258645593057	1.05133952243473e-12	3.15628653921731e-10	205.591	259.126	311.998	256.997	53.2736	6809.51	3306.13	7732	6620.1	867.184	242	249	317	299	51	6627	3364	6851	7914	841	7732	10	YES	YES	UP in Preeclampsia
ENST00000402310.5	ENSG00000115204	MPV17	Protein coding	13563	-6.92923639086636	8.52938651847155e-05	0.0120852355072507	0	10.4067	50.1952	14.6119	36.5603	0	0	0	0	0	0	10	51	17	35	0	0	0	0	0	50.1952	4	YES	NO	DOWN in Preeclampsia
ENST00000402796.5	ENSG00000115970	THADA	Protein coding	230692	3.77123278260293	2.49024419334102e-08	5.03004822806981e-06	8.4955	12.488	15.7475	4.29761	52.229	135.635	236.854	398.394	358.024	138.172	10	12	16	5	50	132	241	353	428	134	398.394	8	YES	YES	UP in Preeclampsia
ENST00000402905.7	ENSG00000138380	CARF	Protein coding	74850	-2.24721681724583	2.03464444181609e-05	0.0033546710938369	883.532	1244.64	236.213	270.749	1090.54	162.351	170.024	209.918	122.966	119.612	1040	1196	240	315	1044	158	173	186	147	116	1244.64	10	YES	YES	DOWN in Preeclampsia
ENST00000403362.5	ENSG00000099992	TBC1D10A	Protein coding	15883	-2.92333159023005	9.47403478849355e-06	0.00163425109758071	135.078	290.346	389.751	696.213	228.763	125.36	21.6215	19.1861	29.2777	34.0274	159	279	396	810	219	122	22	17	35	33	696.213	10	YES	YES	DOWN in Preeclampsia
ENST00000404115.7	ENSG00000158290	CUL4B	Protein coding	49154	-7.94168089074277	8.96781529525854e-14	4.53169300464882e-11	3133.14	125.921	135.822	3376.2	1834.28	0	11.7936	5.64297	4.18253	13.4047	3688	121	138	3928	1756	0	12	5	5	13	3376.2	7	YES	YES	DOWN in Preeclampsia
ENST00000404909.5	ENSG00000115310	RTN4	Protein coding	78640	9.38476243660874	9.9524887330602e-07	0.00018938329023936	0	2.08133	0	0	1.04458	2.05508	1084.03	742.615	204.107	0	0	2	0	0	1	2	1103	658	244	0	1084.03	3	YES	NO	UP in Preeclampsia
ENST00000405222.5	ENSG00000138101	DTNB	Protein coding	296392	-8.42401502616517	3.13467655910563e-06	0.000571967016870232	90.0523	74.9279	0	134.085	15.6687	0	0	0	0	0	106	72	0	156	15	0	0	0	0	0	134.085	4	YES	NO	DOWN in Preeclampsia
ENST00000409076.6	ENSG00000071189	SNX13	Protein coding	147032	6.38801368717077	5.55188622820325e-06	0.000984578458556243	5.94685	5.20333	13.7791	0	4.17832	6.16524	1185.25	7.90016	27.6047	1207.46	7	5	14	0	4	6	1206	7	33	1171	1207.46	4	YES	NO	UP in Preeclampsia
ENST00000409304.5	ENSG00000135919	SERPINE2	Protein coding	64177	-3.38772930967417	1.65799801508652e-06	0.00031010605699485	17310.4	2796.27	2751.88	29483.3	5150.82	1116.94	1202.94	634.27	903.426	1635.38	20376	2687	2796	34302	4931	1087	1224	562	1080	1586	29483.3	10	YES	NO	DOWN in Preeclampsia
ENST00000409587.5	ENSG00000105223	PLD3	Protein coding	29799	-4.79000614545381	1.97949047461489e-05	0.00327359483142304	10357.7	139.449	187.986	896.481	129.528	147.966	85.5034	69.9728	51.8633	68.0549	12192	134	191	1043	124	144	87	62	62	66	10357.7	10	YES	NO	DOWN in Preeclampsia
ENST00000409591.5	ENSG00000136536	MARCH7	Protein coding	33445	-2.49758415296107	0.000438815916582695	0.0481372559715278	228.529	45.7893	16.7317	133.226	50.1398	27.7436	21.6215	7.90016	13.3841	13.4047	269	44	17	155	48	27	22	7	16	13	228.529	9	YES	NO	DOWN in Preeclampsia
ENST00000409757.8	ENSG00000132405	TBC1D14	Protein coding	123267	-2.34472104730957	6.57336158605107e-06	0.00115574335432348	7724.11	1858.63	5599.23	5526.73	2885.13	709.003	583.782	508.996	978.711	1864.29	9092	1786	5689	6430	2762	690	594	451	1170	1808	7724.11	10	YES	YES	DOWN in Preeclampsia
ENST00000409876.5	ENSG00000150556	LYPD6B	Protein coding	176539	-8.20274513396968	4.01501413080362e-06	0.0007237514714954	15.2919	61.3993	101.375	91.9689	0	0	0	0	0	0	18	59	103	107	0	0	0	0	0	0	101.375	4	YES	NO	DOWN in Preeclampsia
ENST00000410093.5	ENSG00000169756	LIMS1	Protein coding	77288	2.74132474295975	7.28273106527246e-15	6.46462448690223e-12	14.4424	14.5693	24.6055	21.488	26.1145	176.737	133.66	179.446	89.5061	96.9266	17	14	25	25	25	172	136	159	107	94	179.446	10	YES	YES	UP in Preeclampsia
ENST00000412318.5	ENSG00000206560	ANKRD28	Protein coding	192184	-10.6472251561709	3.73467253809085e-05	0.00579679068865976	268.458	0	331.682	869.836	0	0	0	0	0	0	316	0	337	1012	0	0	0	0	0	0	869.836	3	YES	NO	DOWN in Preeclampsia
ENST00000413021.2	ENSG00000103066	PLA2G15	Protein coding	14620	-5.66422217134983	0.000163314482244887	0.0214553421162327	17.8406	15.61	14.7633	0	55.3627	0	0	0	0.836505	1.03113	21	15	15	0	53	0	0	0	1	1	55.3627	4	YES	NO	DOWN in Preeclampsia
ENST00000415061.7	ENSG00000160439	RDH13	Protein coding	18834	3.25526141353627	5.49096814396781e-05	0.00819741642423733	45.8757	65.5619	342.509	44.6951	41.7832	1293.67	352.824	391.622	594.755	2526.28	54	63	348	52	40	1259	359	347	711	2450	2526.28	10	YES	NO	UP in Preeclampsia
ENST00000415251.6	ENSG00000006576	PHTF2	Protein coding	124505	4.26305867411815	4.15394161889146e-05	0.0063752521941226	5.0973	10.4067	3.93688	6.87618	14.6241	239.417	344.962	5.64297	189.887	4.12454	6	10	4	8	14	233	351	5	227	4	344.962	5	YES	NO	UP in Preeclampsia
ENST00000415617.5	ENSG00000168918	INPP5D	Protein coding	46180	6.69822558974171	2.70699850776347e-05	0.00434119024363185	5.94685	6.24399	0	0	3.13374	815.867	0	218.947	541.219	13.4047	7	6	0	0	3	794	0	194	647	13	815.867	4	YES	NO	UP in Preeclampsia
ENST00000416016.2	ENSG00000132507	EIF5A	Protein coding	4085	5.46125152383552	1.90349692233959e-07	3.73909638268854e-05	9.34505	19.7726	19.6844	12.0333	18.8024	14.3856	807.86	18.0575	1888.83	775.413	11	19	20	14	18	14	822	16	2258	752	1888.83	9	YES	NO	UP in Preeclampsia
ENST00000417551.5	ENSG00000091140	DLD	Protein coding	40567	-2.91452619947685	0.000284447577044288	0.0336295264269682	16.1415	31.22	16.7317	183.078	36.5603	8.22032	14.742	4.51438	5.01903	5.15567	19	30	17	213	35	8	15	4	6	5	183.078	6	YES	NO	DOWN in Preeclampsia
ENST00000418143.1	ENSG00000144535	DIS3L2	Protein coding	2315	-6.21735544431046	0.000153672615590256	0.0204338539165997	22.0883	13.5287	0	13.7524	18.8024	0	0	0	0	0	26	13	0	16	18	0	0	0	0	0	22.0883	4	YES	NO	DOWN in Preeclampsia
ENST00000418286.1	ENSG00000187017	ESPN	Protein coding	5380	-6.59854782179523	9.95653451989225e-05	0.0138680422882754	20.3892	0	40.353	10.3143	17.7579	0	0	0	0	0	24	0	41	12	17	0	0	0	0	0	40.353	4	YES	NO	DOWN in Preeclampsia
ENST00000418904.5	ENSG00000154978	VOPP1	Protein coding	80650	4.35146795929248	8.84713139644162e-06	0.00153255086884056	2.54865	12.488	6.88954	14.6119	17.7579	14.3856	9.82797	411.937	327.074	343.368	3	12	7	17	17	14	10	365	391	333	411.937	7	YES	YES	UP in Preeclampsia
ENST00000419573.7	ENSG00000058335	RASGRF1	Protein coding	130827	-4.1030571573236	1.18119951699445e-05	0.00201427022099476	97.6983	15.61	8.85798	161.59	111.77	5.1377	0.982797	10.1573	0.836505	6.18681	115	15	9	188	107	5	1	9	1	6	161.59	5	YES	YES	DOWN in Preeclampsia
ENST00000419654.6	ENSG00000150961	SEC24D	Protein coding	99620	2.53506183875967	0.000192243634546083	0.0246254798579475	141.025	106.148	193.891	237.228	32.382	148.993	671.251	1372.37	1415.37	512.474	166	102	197	276	31	145	683	1216	1692	497	1415.37	10	YES	YES	UP in Preeclampsia
ENST00000420137.5	ENSG00000164031	DNAJB14	Protein coding	31775	-3.44550907517054	0.000231939542737185	0.0285308223439813	45.8757	37.464	4.9211	22.3476	276.814	5.1377	10.8108	3.38578	5.85554	10.3113	54	36	5	26	265	5	11	3	7	10	276.814	6	YES	NO	DOWN in Preeclampsia
ENST00000420304.6	ENSG00000143768	LEFTY2	Protein coding	4786	-4.91403055385934	0.00027424027312073	0.0325525997342529	10.1946	13.5287	32.4793	4.29761	1.04458	0	0	1.12859	0.836505	0	12	13	33	5	1	0	0	1	1	0	32.4793	3	YES	NO	DOWN in Preeclampsia
ENST00000420636.5	ENSG00000155849	ELMO1	Protein coding	321836	-3.07525301730434	0.000135214656969306	0.0182005578181848	90.0523	5.20333	121.059	19.769	81.4772	5.1377	8.84518	3.38578	5.85554	14.4359	106	5	123	23	78	5	9	3	7	14	121.059	5	YES	YES	DOWN in Preeclampsia
ENST00000421731.5	ENSG00000144554	FANCD2	Protein coding	52465	-8.97659931207196	0.000276864417160629	0.0328038390023695	259.113	126.961	0	75.6379	0	0	0	0	0	0	305	122	0	88	0	0	0	0	0	0	259.113	3	YES	NO	DOWN in Preeclampsia
ENST00000422222.5	ENSG00000180376	CCDC66	Protein coding	60141	-8.26510040392986	2.58377412016989e-06	0.0004767440656922	50.1235	105.107	95.4694	0	31.3374	0	0	0	0	0	59	101	97	0	30	0	0	0	0	0	105.107	4	YES	NO	DOWN in Preeclampsia
ENST00000422400.6	ENSG00000112303	VNN2	Protein coding	13989	-9.23985791521613	0.000202568785939206	0.0255194780045384	129.132	124.88	300.187	0	0	0	0	0	0	0	152	120	305	0	0	0	0	0	0	0	300.187	3	YES	NO	DOWN in Preeclampsia
ENST00000422911.5	ENSG00000141956	PRDM15	Protein coding	81249	-5.73231398660893	9.64972908444869e-06	0.00166281134395592	183.503	759.686	4.9211	5.15713	33.4265	4.11016	5.89678	0	3.34602	5.15567	216	730	5	6	32	4	6	0	4	5	759.686	3	YES	NO	DOWN in Preeclampsia
ENST00000422955.5	ENSG00000004534	RBM6	Protein coding	137147	-2.39540330353073	0.000443234457285306	0.048460103932409	784.135	1888.81	186.018	1488.69	157.732	155.159	234.889	163.646	143.879	158.795	923	1815	189	1732	151	151	239	145	172	154	1888.81	10	YES	NO	DOWN in Preeclampsia
ENST00000423026.6	ENSG00000167208	SNX20	Protein coding	15013	-5.97168042181288	0.000250124628442807	0.0303136282166944	12.7433	0	10.8264	17.1904	16.7133	0	0	0	0	0	15	0	11	20	16	0	0	0	0	0	17.1904	4	YES	NO	DOWN in Preeclampsia
ENST00000423316.6	ENSG00000104529	EEF1D	Protein coding	17979	8.81113812612859	0.000343556278836584	0.0394330402485786	0	0	0	0	0	0	0	238.133	77.795	77.3351	0	0	0	0	0	0	0	211	93	75	238.133	3	YES	NO	UP in Preeclampsia
ENST00000424091.2	ENSG00000106330	MOSPD3	Protein coding	2829	-7.78612467759226	3.8429318726171e-06	0.000695020469446514	63.7163	0	62.0059	47.2737	29.2482	0	0	0	0	0	75	0	63	55	28	0	0	0	0	0	63.7163	4	YES	NO	DOWN in Preeclampsia
ENST00000425728.6	ENSG00000050130	JKAMP	Protein coding	20201	-2.40013716226466	0.000178317432110245	0.0231120221517603	1362.68	461.015	686.986	869.836	121.171	99.6714	185.749	40.6294	186.541	150.546	1604	443	698	1012	116	97	189	36	223	146	1362.68	10	YES	YES	DOWN in Preeclampsia
ENST00000425778.5	ENSG00000115875	SRSF7	Protein coding	7815	-1.12031516358247	0.00044735618592479	0.0487161393502634	1953.12	1281.06	1746.99	1329.68	1706.84	1062.48	952.331	397.265	592.246	683.642	2299	1231	1775	1547	1634	1034	969	352	708	663	1953.12	10	YES	YES	DOWN in Preeclampsia
ENST00000425934.5	ENSG00000126001	CEP250	Protein coding	15799	8.68595145779127	0.000407680360463136	0.0454504096636357	0	0	0	0	0	52.4046	108.108	0	0	200.04	0	0	0	0	0	51	110	0	0	194	200.04	3	YES	NO	UP in Preeclampsia
ENST00000426073.6	ENSG00000102606	ARHGEF7	Protein coding	118884	3.00589245342592	0.000416161125967694	0.0461141348071274	4.24775	18.732	23.6213	29.2237	38.6494	237.362	25.5527	383.722	21.7491	250.566	5	18	24	34	37	231	26	340	26	243	383.722	9	YES	NO	UP in Preeclampsia
ENST00000426296.1	ENSG00000161640	SIGLEC11	Protein coding	8789	-7.05334309739041	1.69471207962864e-05	0.00283692383580486	29.7343	27.0573	37.4004	27.5047	0	0	0	0	0	0	35	26	38	32	0	0	0	0	0	0	37.4004	4	YES	NO	DOWN in Preeclampsia
ENST00000426793.1	ENSG00000116161	CACYBP	Protein coding	5316	4.2437648807029	0.000211641790110453	0.0264098719516401	1.6991	1.04067	0	0.859522	0	18.4957	2.94839	2.25719	26.7682	19.5916	2	1	0	1	0	18	3	2	32	19	26.7682	3	YES	NO	UP in Preeclampsia
ENST00000426927.5	ENSG00000183963	SMTN	Protein coding	7257	4.86504087186557	0.000406217973915258	0.0454106897484111	0	5.20333	0	0	0	7.19278	7.86238	84.6445	26.7682	20.6227	0	5	0	0	0	7	8	75	32	20	84.6445	3	YES	NO	UP in Preeclampsia
ENST00000427335.6	ENSG00000090530	P3H2	Protein coding	165607	-26.6446487988839	3.85805899822098e-23	1.05593788761642e-18	1176.63	0	0	2202.95	636.149	0	0	0	0	0	1385	0	0	2563	609	0	0	0	0	0	2202.95	3	YES	NO	DOWN in Preeclampsia
ENST00000427865.2	ENSG00000131446	MGAT1	Protein coding	12423	-3.73237919247565	2.57622473216687e-05	0.00417221373833313	643.959	7781.06	307.077	312.006	4399.77	155.159	329.237	148.974	223.347	154.67	758	7477	312	363	4212	151	335	132	267	150	7781.06	10	YES	NO	DOWN in Preeclampsia
ENST00000428713.5	ENSG00000106829	TLE4	Protein coding	134562	-6.98330213896105	6.36789998252879e-05	0.00937028494024115	19.5397	0	12.7949	18.9095	64.7639	0	0	0	0	0	23	0	13	22	62	0	0	0	0	0	64.7639	4	YES	NO	DOWN in Preeclampsia
ENST00000428839.1	ENSG00000172061	LRRC15	Protein coding	11805	-9.78741814965942	6.79770158289311e-07	0.000130561983454917	399.289	21.854	56.1006	332.635	0	0	0	0	0	0	470	21	57	387	0	0	0	0	0	0	399.289	4	YES	NO	DOWN in Preeclampsia
ENST00000429220.5	ENSG00000109917	ZPR1	Protein coding	10260	-4.36424170233157	0.000286512751631854	0.0337764185552619	26.3361	201.889	29.5266	612.839	25.0699	0	9.82797	9.02875	23.4221	1.03113	31	194	30	713	24	0	10	8	28	1	612.839	6	YES	NO	DOWN in Preeclampsia
ENST00000430477.6	ENSG00000140688	C16orf58	Protein coding	18882	11.7517494002887	5.13256239209706e-10	1.06287406167137e-07	0	0	0	0	0	0	514.986	746.001	567.987	1189.93	0	0	0	0	0	0	524	661	679	1154	1189.93	4	YES	NO	UP in Preeclampsia
ENST00000431222.6	ENSG00000124491	F13A1	Protein coding	54172	-6.67632257532573	0.000264737364887348	0.0316609288241172	56.0703	18.732	63.9743	0	1.04458	0	0.982797	0	0	0	66	18	65	0	1	0	1	0	0	0	63.9743	3	YES	NO	DOWN in Preeclampsia
ENST00000431375.6	ENSG00000103423	DNAJA3	Protein coding	30968	2.7429072245388	1.25318211038613e-05	0.00212818055639492	125.733	85.3346	66.927	90.2498	71.0314	1041.93	191.646	259.577	1253.08	194.884	148	82	68	105	68	1014	195	230	1498	189	1253.08	10	YES	NO	UP in Preeclampsia
ENST00000431882.3	ENSG00000136197	C7orf25	Protein coding	2638	-5.19386957362259	0.000408598994346174	0.0455219197106784	0.84955	579.651	436.01	23.2071	1.04458	1.02754	1.96559	2.25719	20.9126	2.06227	1	557	443	27	1	1	2	2	25	2	579.651	4	YES	NO	DOWN in Preeclampsia
ENST00000432483.6	ENSG00000138777	PPA2	Protein coding	104486	-6.95262534601155	2.55957821363847e-05	0.00415344678940003	22.0883	0	25.5897	24.0666	41.7832	0	0	0	0	0	26	0	26	28	40	0	0	0	0	0	41.7832	4	YES	NO	DOWN in Preeclampsia
ENST00000433408.1	ENSG00000170485	NPAS2	Protein coding	13802	1.34112731663737	6.24657370305689e-05	0.00921653046153276	24.637	57.2366	27.5582	20.6285	29.2482	79.1206	76.6582	93.6733	86.16	65.9926	29	55	28	24	28	77	78	83	103	64	93.6733	10	YES	YES	UP in Preeclampsia
ENST00000433655.5	ENSG00000117984	CTSD	Protein coding	11127	-8.00567782203341	7.67146988897334e-06	0.00133736034206733	19.5397	10.4067	33.4635	27246	9.40122	1.02754	73.7098	7.90016	9.20156	14.4359	23	10	34	31699	9	1	75	7	11	14	27246	6	YES	NO	DOWN in Preeclampsia
ENST00000433751.5	ENSG00000104524	PYCR3	Protein coding	4084	-5.8899564893724	0.00029614575114046	0.0347374735434172	12.7433	13.5287	10.8264	17.1904	0	0	0	0	0	0	15	13	11	20	0	0	0	0	0	0	17.1904	4	YES	NO	DOWN in Preeclampsia
ENST00000433959.5	ENSG00000154978	VOPP1	Protein coding	67081	5.96512570152491	8.48840291705332e-07	0.000162087040724728	3.3982	9.36599	7.87376	8.59522	10.4458	6.16524	7.86238	67.7156	1550.04	843.468	4	9	8	10	10	6	8	60	1853	818	1550.04	4	YES	NO	UP in Preeclampsia
ENST00000434476.6	ENSG00000136193	SCRN1	Protein coding	66433	-8.88869906791189	0.000432954032548248	0.0475577560648884	52.6721	325.728	56.1006	0	0	0	0	0	0	0	62	313	57	0	0	0	0	0	0	0	325.728	3	YES	NO	DOWN in Preeclampsia
ENST00000434835.2	ENSG00000174579	MSL2	Protein coding	43928	3.31990337188985	3.60924239777273e-05	0.00562870435021313	199.644	73.8873	56.1006	339.511	289.349	2967.54	84.5206	1815.91	2482.75	2222.09	235	71	57	395	277	2888	86	1609	2968	2155	2967.54	10	YES	YES	UP in Preeclampsia
ENST00000435126.6	ENSG00000128872	TMOD2	Protein coding	57215	8.96853450578065	0.000244643725861301	0.0298033407815216	0	0	0	0	0	102.754	0	0	223.347	112.394	0	0	0	0	0	100	0	0	267	109	223.347	3	YES	NO	UP in Preeclampsia
ENST00000435145.6	ENSG00000232629	HLA-DQB2	Protein coding	7435	-6.84290223286845	7.16545089835241e-05	0.010390985093802	30.5838	0	28.5424	38.6785	7.31206	0	0	0	0	0	36	0	29	45	7	0	0	0	0	0	38.6785	3	YES	NO	DOWN in Preeclampsia
ENST00000435159.2	ENSG00000181234	TMEM132C	Protein coding	440513	-5.0114000440523	1.36206917209181e-06	0.000257099167014452	1286.22	200.848	638.759	9067.1	2428.65	56.5147	52.0883	25.9577	276.047	11.3425	1514	193	649	10549	2325	55	53	23	330	11	9067.1	10	YES	NO	DOWN in Preeclampsia
ENST00000436774.6	ENSG00000126746	ZNF384	Protein coding	16050	1.26360646363983	0.000353881497755908	0.0403847892970672	35.6811	22.8946	12.7949	33.5214	29.2482	45.2118	89.4346	65.4584	60.2284	62.8992	42	22	13	39	28	44	91	58	72	61	89.4346	10	YES	YES	UP in Preeclampsia
ENST00000437324.6	ENSG00000117280	RAB29	Protein coding	5749	-7.38885431476668	4.17935871102085e-05	0.006408271977651	10.1946	0	25.5897	24.9261	92.9676	0	0	0	0	0	12	0	26	29	89	0	0	0	0	0	92.9676	4	YES	NO	DOWN in Preeclampsia
ENST00000437509.3	ENSG00000131386	GALNT15	Protein coding	57284	-7.02194526175843	3.88049096496038e-09	7.9655808160483e-07	1191.92	334.054	8.85798	356.702	775.078	5.1377	0	0	5.01903	10.3113	1403	321	9	415	742	5	0	0	6	10	1191.92	5	YES	YES	DOWN in Preeclampsia
ENST00000437545.5	ENSG00000011566	MAP4K3	Protein coding	130532	-6.62027272542458	2.40202412368229e-06	0.000444707550781126	5.0973	10.4067	5.90532	2824.39	368.737	6.16524	9.82797	2.25719	9.20156	5.15567	6	10	6	3286	353	6	10	2	11	5	2824.39	3	YES	NO	DOWN in Preeclampsia
ENST00000437822.6	ENSG00000106290	TAF6	Protein coding	12674	8.63482139199817	1.82435952200106e-05	0.00303538674755795	5.0973	0	5.90532	0.859522	0	1470.41	0	1638.72	1621.15	0	6	0	6	1	0	1431	0	1452	1938	0	1638.72	3	YES	NO	UP in Preeclampsia
ENST00000438581.6	ENSG00000176142	TMEM39A	Protein coding	34098	-3.38224198481529	2.94704941162008e-07	5.75456076429758e-05	2151.91	1002.16	862.177	1428.53	1677.59	230.169	160.196	121.888	161.445	9.28021	2533	963	876	1662	1606	224	163	108	193	9	2151.91	9	YES	YES	DOWN in Preeclampsia
ENST00000438672.5	ENSG00000115380	EFEMP1	Protein coding	6117	8.78753365133118	0.000354421032209086	0.0404182729634109	0	0	0	0	0	206.536	0	82.3874	0	97.9578	0	0	0	0	0	201	0	73	0	95	206.536	3	YES	NO	UP in Preeclampsia
ENST00000438756.5	ENSG00000166863	TAC3	Protein coding	6511	-13.5323097278963	1.83889610224178e-10	3.83223147357792e-08	303.289	3013.77	979.299	6563.31	0	0	0	0	0	0	357	2896	995	7636	0	0	0	0	0	0	6563.31	4	YES	NO	DOWN in Preeclampsia
ENST00000438932.2	ENSG00000182013	PNMA8A	Protein coding	4917	6.96839304450651	7.324243065976e-05	0.0105971149586647	0	1.04067	0	0	1.04458	0	108.108	95.9305	0.836505	39.1831	0	1	0	0	1	0	110	85	1	38	108.108	3	YES	NO	UP in Preeclampsia
ENST00000439082.7	ENSG00000196139	AKR1C3	Protein coding	58692	6.5037873408034	0.000269753544544526	0.0321468705210545	0	0	0	0	0	0	27.5183	23.7005	25.0952	3.0934	0	0	0	0	0	0	28	21	30	3	27.5183	3	YES	NO	UP in Preeclampsia
ENST00000439140.5	ENSG00000155754	C2CD6	Protein coding	131568	-1.73334321683051	0.000111811368321868	0.0154427580177296	33.982	44.7486	43.3057	86.8117	94.0122	17.4682	8.84518	25.9577	18.4031	20.6227	40	43	44	101	90	17	9	23	22	20	94.0122	9	YES	YES	DOWN in Preeclampsia
ENST00000439649.7	ENSG00000151892	GFRA1	Protein coding	216352	5.32834622207377	0.000174880564889338	0.0227203612381308	13.5928	12.488	7.87376	30.9428	12.535	20.5508	3.93119	3048.33	20.0761	20.6227	16	12	8	36	12	20	4	2701	24	20	3048.33	8	YES	NO	UP in Preeclampsia
ENST00000440513.7	ENSG00000185024	BRF1	Protein coding	105223	-7.05822250180672	0.000234734318212177	0.0288314138131393	11.8937	4.16266	0	599.946	43.8723	4.11016	0	0	0.836505	0	14	4	0	698	42	4	0	0	1	0	599.946	3	YES	NO	DOWN in Preeclampsia
ENST00000440600.6	ENSG00000143493	INTS7	Protein coding	94008	-10.9554504017923	2.41113992761687e-05	0.00392810095866456	835.108	0	311.998	673.006	0	0	0	0	0	0	983	0	317	783	0	0	0	0	0	0	835.108	3	YES	NO	DOWN in Preeclampsia
ENST00000440686.5	ENSG00000135502	SLC26A10	Protein coding	5802	9.3089783704282	3.52127745932718e-06	0.000639664979884725	0	0	0	0	0	0	74.6926	369.05	105.4	6.18681	0	0	0	0	0	0	76	327	126	6	369.05	3	YES	NO	UP in Preeclampsia
ENST00000441556.5	ENSG00000077063	CTTNBP2	Protein coding	162567	-10.3780012459593	4.80581895542602e-10	9.96467142957259e-08	462.155	21.854	36.4162	687.618	11.4904	0	0	0	0	0	544	21	37	800	11	0	0	0	0	0	687.618	5	YES	NO	DOWN in Preeclampsia
ENST00000441843.5	ENSG00000179630	LACC1	Protein coding	14648	-1.79004581405765	4.74328833898661e-06	0.000846666657012721	1507.1	1076.05	958.631	972.119	1480.17	238.389	328.254	665.87	313.689	187.666	1774	1034	974	1131	1417	232	334	590	375	182	1507.1	10	YES	YES	DOWN in Preeclampsia
ENST00000442373.5	ENSG00000168137	SETD5	Protein coding	11702	2.52274077268738	0.000102258025575837	0.0141829463209568	1.6991	9.36599	1.96844	3.43809	2.08916	17.4682	24.5699	31.6006	8.36505	23.7161	2	9	2	4	2	17	25	28	10	23	31.6006	4	YES	NO	UP in Preeclampsia
ENST00000445644.5	ENSG00000173163	COMMD1	Protein coding	95229	2.46039922638968	0.000448032585313193	0.0487574652716779	1.6991	8.32532	8.85798	5.15713	7.31206	11.3029	14.742	85.7731	30.9507	28.8718	2	8	9	6	7	11	15	76	37	28	85.7731	5	YES	NO	UP in Preeclampsia
ENST00000445890.6	ENSG00000079819	EPB41L2	Protein coding	223957	-4.3783364984311	2.63343950493662e-05	0.00424394669893702	49.2739	20.8133	0.98422	31.8023	99.2351	0	1.96559	2.25719	3.34602	2.06227	58	20	1	37	95	0	2	2	4	2	99.2351	4	YES	NO	DOWN in Preeclampsia
ENST00000446780.5	ENSG00000114988	LMAN2L	Protein coding	33188	6.49229682701259	8.63093125242656e-07	0.000164617220489081	0	2.08133	0	0	0	4.11016	41.2775	69.9728	47.6808	12.3736	0	2	0	0	0	4	42	62	57	12	69.9728	4	YES	NO	UP in Preeclampsia
ENST00000448395.6	ENSG00000128944	KNSTRN	Protein coding	11337	-6.96341524721014	0.000203065343341659	0.025551692681541	41.628	4.16266	57.0848	0	11.4904	0	0	0	0	0	49	4	58	0	11	0	0	0	0	0	57.0848	3	YES	NO	DOWN in Preeclampsia
ENST00000448456.3	ENSG00000213030	CGB8	Protein coding	1469	4.26107367382585	0.000309072547405215	0.0360990580297223	910.718	599.423	341.524	9.45474	1318.26	7115.72	17458.4	31.6006	12629.6	23724.3	1072	576	347	11	1262	6925	17764	28	15098	23008	23724.3	9	YES	YES	UP in Preeclampsia
ENST00000449340.1	ENSG00000116455	WDR77	Protein coding	7502	2.75441516094819	0.000168353133664754	0.0219941248243107	0.84955	6.24399	5.90532	3.43809	11.4904	22.6059	77.641	21.4433	51.8633	12.3736	1	6	6	4	11	22	79	19	62	12	77.641	6	YES	YES	UP in Preeclampsia
ENST00000449375.1	ENSG00000042445	RETSAT	Protein coding	11819	10.4877581367944	5.21597225683591e-05	0.00782958438823655	0	0	0	0	0	86.3134	598.524	0	572.17	0	0	0	0	0	0	84	609	0	684	0	598.524	3	YES	NO	UP in Preeclampsia
ENST00000449653.5	ENSG00000093010	COMT	Protein coding	6429	6.26123077535465	6.26657490229832e-08	1.24737502703712e-05	24.637	67.6433	8.85798	29.2237	6.26748	2792.85	3718.91	3891.39	18.4031	56.7124	29	65	9	34	6	2718	3784	3448	22	55	3891.39	8	YES	YES	UP in Preeclampsia
ENST00000450573.5	ENSG00000150459	SAP18	Protein coding	6546	1.04943176869869	2.44099180383428e-05	0.00396885932714909	39.9289	39.5453	27.5582	36.9594	26.1145	64.735	72.727	89.1589	60.2284	67.0237	47	38	28	43	25	63	74	79	72	65	89.1589	10	YES	YES	UP in Preeclampsia
ENST00000451406.5	ENSG00000139974	SLC38A6	Protein coding	102437	-8.50771280227782	7.86237209068737e-07	0.000150307685679686	48.4244	128.002	73.8165	83.3736	0	0	0	0	0	0	57	123	75	97	0	0	0	0	0	0	128.002	4	YES	NO	DOWN in Preeclampsia
ENST00000452085.7	ENSG00000111817	DSE	Protein coding	164741	-4.74113203592899	7.71631380172759e-06	0.00134375145269576	1452.73	87.4159	1156.46	121.193	1332.88	122.277	4.91399	11.2859	7.52855	9.28021	1710	84	1175	141	1276	119	5	10	9	9	1452.73	7	YES	YES	DOWN in Preeclampsia
ENST00000452894.5	ENSG00000182247	UBE2E2	Protein coding	329516	-2.26018573873259	0.000442198375756946	0.0484216362621997	7.64595	44.7486	14.7633	55.0094	50.1398	7.19278	5.89678	11.2859	7.52855	4.12454	9	43	15	64	48	7	6	10	9	4	55.0094	5	YES	YES	DOWN in Preeclampsia
ENST00000452931.1	ENSG00000115677	HDLBP	Protein coding	9379	4.01553557249166	0.000161733491359259	0.0213329722763332	1.6991	6.24399	3.93688	37.819	42.8278	405.878	134.643	6.77156	647.455	301.091	2	6	4	44	41	395	137	6	774	292	647.455	6	YES	YES	UP in Preeclampsia
ENST00000453318.6	ENSG00000101871	MID1	Protein coding	232430	5.74817036070759	5.58447653023265e-08	1.1183799595631e-05	0	4.16266	12.7949	6.01665	7.31206	844.638	265.355	14.6717	61.0649	437.201	0	4	13	7	7	822	270	13	73	424	844.638	6	YES	NO	UP in Preeclampsia
ENST00000453680.5	ENSG00000114745	GORASP1	Protein coding	10905	-3.19272183770114	0.00030046207128116	0.0351934953078813	146.123	69.7246	79.7218	1590.12	1549.11	65.7626	67.813	84.6445	81.141	76.3039	172	67	81	1850	1483	64	69	75	97	74	1590.12	10	YES	NO	DOWN in Preeclampsia
ENST00000454000.6	ENSG00000142794	NBPF3	Protein coding	43340	-3.97354215591261	5.64593467997754e-05	0.00842110900342008	62.8667	17.6913	62.9901	28.3642	16.7133	0	8.84518	1.12859	0	2.06227	74	17	64	33	16	0	9	1	0	2	62.9901	5	YES	YES	DOWN in Preeclampsia
ENST00000455106.1	ENSG00000141756	FKBP10	Protein coding	3959	5.12335431031914	5.04298067538599e-05	0.00759768991330768	7.64595	10.4067	9.8422	4.29761	8.35664	17.4682	2.94839	1268.54	10.8746	112.394	9	10	10	5	8	17	3	1124	13	109	1268.54	5	YES	NO	UP in Preeclampsia
ENST00000456197.1	ENSG00000196367	TRRAP	Protein coding	112564	3.73686931369234	4.37611499507059e-09	8.97174597079279e-07	11.8937	10.4067	12.7949	10.3143	21.9362	162.351	276.166	257.319	180.685	19.5916	14	10	13	12	21	158	281	228	216	19	276.166	10	YES	YES	UP in Preeclampsia
ENST00000458521.6	ENSG00000166863	TAC3	Protein coding	6542	-7.42499329920606	1.14650607797118e-05	0.0019591772644357	2718.56	15779.6	7201.54	83639.2	160.865	365.804	80.5894	0	190.723	0	3200	15163	7317	97309	154	356	82	0	228	0	83639.2	8	YES	NO	DOWN in Preeclampsia
ENST00000460625.1	ENSG00000114638	UPK1B	Protein coding	18404	-26.2967481513171	1.96004554576442e-21	2.92613417667583e-17	220.883	0	343.493	3075.37	0	0	0	0	0	0	260	0	349	3578	0	0	0	0	0	0	3075.37	3	YES	NO	DOWN in Preeclampsia
ENST00000461490.1	ENSG00000133256	PDE6B	Protein coding	5405	6.15412427143472	0.000272099174245304	0.0323559610399822	0	0	0	0	0	9.24786	21.6215	19.1861	0	12.3736	0	0	0	0	0	9	22	17	0	12	21.6215	3	YES	NO	UP in Preeclampsia
ENST00000463128.5	ENSG00000128422	KRT17	Protein coding	3817	-5.94595604175534	0.000191500934432796	0.0245686722270976	22.0883	39.5453	43.3057	0	20.8916	0	0	2.25719	0	0	26	38	44	0	20	0	0	2	0	0	43.3057	4	YES	NO	DOWN in Preeclampsia
ENST00000464813.5	ENSG00000186501	TMEM222	Protein coding	12616	2.97896843097427	0.000376114669121761	0.0425670563293159	2.54865	1.04067	25.5897	1.71904	2.08916	58.5698	37.3463	49.6581	51.8633	61.8681	3	1	26	2	2	57	38	44	62	60	61.8681	6	YES	YES	UP in Preeclampsia
ENST00000468861.5	ENSG00000114416	FXR1	Protein coding	63875	-10.1710776765355	6.15597445275125e-05	0.00909102349534087	0	376.721	0	363.578	316.508	0	0	0	0	0	0	362	0	423	303	0	0	0	0	0	376.721	3	YES	NO	DOWN in Preeclampsia
ENST00000469902.5	ENSG00000221955	SLC12A8	Protein coding	129609	-9.85369963865351	4.86375963980168e-06	0.000866533252394372	33.1325	992.795	566.911	5061.72	0	0	0	0	0	7.21794	39	954	576	5889	0	0	0	0	0	7	5061.72	4	YES	NO	DOWN in Preeclampsia
ENST00000472396.5	ENSG00000186591	UBE2H	Protein coding	113740	4.19688857414478	0.000176403637736524	0.0229001206180367	10.1946	9.36599	20.6686	12.8928	7.31206	651.461	423.586	10.1573	10.0381	13.4047	12	9	21	15	7	634	431	9	12	13	651.461	8	YES	NO	UP in Preeclampsia
ENST00000474237.1	ENSG00000154358	OBSCN	Protein coding	8217	4.1857670315757	0.000199538533838116	0.0252829087719641	13.5928	9.36599	5.90532	1.71904	8.35664	72.9554	64.8646	0	135.514	435.139	16	9	6	2	8	71	66	0	162	422	435.139	5	YES	NO	UP in Preeclampsia
ENST00000474584.5	ENSG00000156313	RPGR	Protein coding	57987	-8.2676095648569	6.70217977400308e-14	3.64443231167959e-11	49.2739	48.9113	33.4635	116.035	34.4711	0	0	0	0	0	58	47	34	135	33	0	0	0	0	0	116.035	5	YES	YES	DOWN in Preeclampsia
ENST00000474717.2	ENSG00000101109	STK4	Protein coding	24716	-5.87420249462103	8.62422391270852e-08	1.71459177057768e-05	39.9289	129.043	40.353	78.2165	2.08916	2.05508	0.982797	0	0.836505	1.03113	47	124	41	91	2	2	1	0	1	1	129.043	4	YES	NO	DOWN in Preeclampsia
ENST00000474951.1	ENSG00000131398	KCNC3	Protein coding	21574	-5.68298975497103	0.000189065017693724	0.0243131394484166	0.84955	540.105	6.88954	1227.4	7.31206	5.1377	0	10.1573	5.01903	14.4359	1	519	7	1428	7	5	0	9	6	14	1227.4	4	YES	NO	DOWN in Preeclampsia
ENST00000475298.5	ENSG00000163660	CCNL1	Protein coding	12360	-2.90718245566034	2.73472680609357e-06	0.00050177806328835	599.782	517.211	713.56	663.551	958.924	54.4596	60.9334	259.577	65.2474	20.6227	706	497	725	772	918	53	62	230	78	20	958.924	10	YES	YES	DOWN in Preeclampsia
ENST00000475894.5	ENSG00000080845	DLGAP4	Protein coding	67300	4.12557956001247	8.31545041940417e-10	1.71983203649082e-07	134.229	231.028	219.481	161.59	92.9676	2605.84	258.476	6461.2	2901.84	2422.13	158	222	223	188	89	2536	263	5725	3469	2349	6461.2	10	YES	YES	UP in Preeclampsia
ENST00000476176.5	ENSG00000078070	MCCC1	Protein coding	79381	-10.2040571296876	1.9276761249162e-08	3.91781086486992e-06	0	203.97	367.114	269.89	240.253	0	0	0	0	0	0	196	373	314	230	0	0	0	0	0	367.114	4	YES	NO	DOWN in Preeclampsia
ENST00000476605.7	ENSG00000107745	MICU1	Protein coding	183859	3.8132403407382	7.74320929032795e-05	0.011095762157409	4.24775	26.0166	2.95266	17.1904	18.8024	31.8537	400.981	182.832	347.15	8.24907	5	25	3	20	18	31	408	162	415	8	400.981	7	YES	NO	UP in Preeclampsia
ENST00000477073.5	ENSG00000143797	MBOAT2	Protein coding	130602	6.02843893020563	0.00024331116984766	0.0296850473180111	0	0	0	0	0	0	8.84518	16.9289	15.8936	15.467	0	0	0	0	0	0	9	15	19	15	16.9289	3	YES	NO	UP in Preeclampsia
ENST00000477593.5	ENSG00000051382	PIK3CB	Protein coding	180735	4.70873720424749	6.8957684290971e-05	0.0100748158353155	28.8847	34.342	27.5582	12.0333	40.7386	11.3029	3375.91	39.5008	173.993	151.577	34	33	28	14	39	11	3435	35	208	147	3375.91	10	YES	NO	UP in Preeclampsia
ENST00000478717.5	ENSG00000073417	PDE8A	Protein coding	156052	-9.04393279409306	0.000252401027827373	0.0304994790196877	0	0	110.233	249.261	124.305	0	0	0	0	0	0	0	112	290	119	0	0	0	0	0	249.261	3	YES	NO	DOWN in Preeclampsia
ENST00000482023.5	ENSG00000171163	ZNF692	Protein coding	5414	6.36424690460466	2.45286204598036e-05	0.00398421463369736	0.84955	2.08133	0	2.57857	0	175.709	0	159.132	118.784	4.12454	1	2	0	3	0	171	0	141	142	4	175.709	3	YES	NO	UP in Preeclampsia
ENST00000483687.5	ENSG00000114054	PCCB	Protein coding	79815	-9.28521604393178	0.000192457303899681	0.0246336348650022	0	96.7819	201.765	273.328	0	0	0	0	0	0	0	93	205	318	0	0	0	0	0	0	273.328	3	YES	NO	DOWN in Preeclampsia
ENST00000485377.5	ENSG00000124313	IQSEC2	Protein coding	15266	8.49157374768809	8.18128283010468e-06	0.00142170783470278	0	0	0	0	0	57.5423	0	213.304	30.9507	13.4047	0	0	0	0	0	56	0	189	37	13	213.304	4	YES	NO	UP in Preeclampsia
ENST00000487794.5	ENSG00000159069	FBXW5	Protein coding	2234	1.64802569703847	0.000380392760766839	0.0429892050816345	423.076	289.305	354.319	336.933	424.099	1091.25	1754.29	303.592	845.707	1733.34	498	278	360	392	406	1062	1785	269	1011	1681	1754.29	10	YES	YES	UP in Preeclampsia
ENST00000489404.5	ENSG00000101911	PRPS2	Protein coding	18882	1.80349014317588	2.56577562815248e-05	0.00415939330803498	3.3982	15.61	15.7475	9.45474	13.5795	47.2669	28.5011	47.4009	33.4602	43.3076	4	15	16	11	13	46	29	42	40	42	47.4009	8	YES	YES	UP in Preeclampsia
ENST00000489702.6	ENSG00000128604	IRF5	Protein coding	12416	-8.69205685540184	4.44803195241106e-06	0.000797431125721659	412.881	47.8706	98.422	0	6.26748	0	0	1.12859	0	0	486	46	100	0	6	0	0	1	0	0	412.881	3	YES	NO	DOWN in Preeclampsia
ENST00000491050.1	ENSG00000174579	MSL2	Protein coding	44378	2.4421109112233	0.000253685002704517	0.0305919084369855	0.84955	6.24399	9.8422	6.01665	1.04458	33.9088	29.4839	18.0575	12.5476	36.0897	1	6	10	7	1	33	30	16	15	35	36.0897	5	YES	YES	UP in Preeclampsia
ENST00000491466.5	ENSG00000008838	MED24	Protein coding	3298	-3.93289328847941	5.66951234303624e-05	0.00844860234073253	5.0973	205.011	256.881	10.3143	241.298	9.24786	2.94839	6.77156	12.5476	15.467	6	197	261	12	231	9	3	6	15	15	256.881	6	YES	YES	DOWN in Preeclampsia
ENST00000492094.6	ENSG00000181355	OFCC1	Protein coding	343039	-2.80173016881915	0.00020523268316787	0.0257667437037165	10.1946	7.28466	31.495	50.7118	77.2989	6.16524	3.93119	9.02875	3.34602	3.0934	12	7	32	59	74	6	4	8	4	3	77.2989	4	YES	NO	DOWN in Preeclampsia
ENST00000492259.6	ENSG00000026036	RTEL1-TNFRSF6B	Protein coding	39385	1.54251571169551	0.000201059417062427	0.0253786128756016	77.3091	148.815	52.1637	132.366	170.266	344.226	400.981	397.265	380.61	168.075	91	143	53	154	163	335	408	352	455	163	400.981	10	YES	YES	UP in Preeclampsia
ENST00000497289.5	ENSG00000163902	RPN1	Protein coding	60917	7.02635352755336	8.36133851211649e-05	0.0119087795991565	6.7964	26.0166	17.716	6.87618	5.2229	0	8123.8	12.4145	15.0571	8.24907	8	25	18	8	5	0	8266	11	18	8	8123.8	5	YES	NO	UP in Preeclampsia
ENST00000497979.5	ENSG00000135249	RINT1	Protein coding	35465	11.3814379617955	1.47482649097641e-05	0.0024891372733316	0	0	0	0	0	0	0	897.232	1059.85	378.426	0	0	0	0	0	0	0	795	1267	367	1059.85	3	YES	NO	UP in Preeclampsia
ENST00000503335.6	ENSG00000145794	MEGF10	Protein coding	170392	-9.77076800162038	2.70317319314797e-17	7.92695884700667e-14	274.405	144.653	151.57	194.252	35.5157	0	0	0	0	0	323	139	154	226	34	0	0	0	0	0	274.405	5	YES	YES	DOWN in Preeclampsia
ENST00000503952.5	ENSG00000164066	INTU	Protein coding	83514	24.3446509538379	2.94438885919541e-19	1.66731603337708e-15	0	0	0	0	0	196.26	20.6387	976.234	0	0	0	0	0	0	0	191	21	865	0	0	976.234	3	YES	NO	UP in Preeclampsia
ENST00000504171.1	ENSG00000168824	HGNC:18790	Protein coding	30775	3.90507575210808	0.000421940017463786	0.0466286310820108	29.7343	82.2126	37.4004	49.8523	95.0567	910.401	1575.42	0	665.022	1255.92	35	79	38	58	91	886	1603	0	795	1218	1575.42	9	YES	YES	UP in Preeclampsia
ENST00000504305.5	ENSG00000163697	APBB2	Protein coding	41410	10.0635654879826	3.10833309528998e-08	6.26311956125559e-06	0	0	0	0	0	2.05508	326.289	506.739	98.7076	3.0934	0	0	0	0	0	2	332	449	118	3	506.739	3	YES	NO	UP in Preeclampsia
ENST00000504405.5	ENSG00000143322	ABL2	Protein coding	35327	1.46348468975956	0.000357621641745962	0.0407549693020391	166.512	200.848	219.481	158.152	128.483	416.154	158.23	521.41	686.771	625.899	196	193	223	184	123	405	161	462	821	607	686.771	10	YES	YES	UP in Preeclampsia
ENST00000504452.5	ENSG00000152784	PRDM8	Protein coding	20045	-8.77591652252929	2.80991873205754e-07	5.49332421834553e-05	1.6991	6.24399	231.292	25.7857	136.84	0	0	0	0	0	2	6	235	30	131	0	0	0	0	0	231.292	3	YES	NO	DOWN in Preeclampsia
ENST00000506107.1	ENSG00000114019	AMOTL2	Protein coding	3867	3.11564736267332	4.14463836685771e-05	0.00637024793118599	4.24775	0	4.9211	0.859522	0	17.4682	15.7248	27.0863	14.2206	14.4359	5	0	5	1	0	17	16	24	17	14	27.0863	5	YES	YES	UP in Preeclampsia
ENST00000506554.5	ENSG00000081189	MEF2C	Protein coding	162329	-8.77000880639747	0.000327506059006295	0.0379551093845418	77.3091	0	0	174.483	148.33	0	0	0	0	0	91	0	0	203	142	0	0	0	0	0	174.483	3	YES	NO	DOWN in Preeclampsia
ENST00000506778.1	ENSG00000164347	GFM2	Protein coding	15769	6.54300515878373	7.16912038344011e-05	0.010390985093802	0	0	0	0	0	17.4682	18.6732	30.472	15.0571	0	0	0	0	0	0	17	19	27	18	0	30.472	4	YES	NO	UP in Preeclampsia
ENST00000506985.5	ENSG00000145332	KLHL8	Protein coding	58020	7.52589171240688	8.93612940724459e-05	0.012574749777197	0	0	0	0	0	24.661	11.7936	6.77156	117.947	0	0	0	0	0	0	24	12	6	141	0	117.947	3	YES	NO	UP in Preeclampsia
ENST00000507165.5	ENSG00000169026	MFSD7	Protein coding	4498	3.18037059348887	0.000348307482153319	0.0398872790127293	2.54865	0	2.95266	0	0	11.3029	5.89678	7.90016	13.3841	12.3736	3	0	3	0	0	11	6	7	16	12	13.3841	3	YES	NO	UP in Preeclampsia
ENST00000507212.1	ENSG00000146067	FAM193B	Protein coding	4439	-1.25965135882148	3.81809811870302e-06	0.000691290448574611	110.442	75.9686	99.4063	66.1832	73.1206	28.7711	34.3979	36.115	46.8443	30.934	130	73	101	77	70	28	35	32	56	30	110.442	10	YES	YES	DOWN in Preeclampsia
ENST00000508624.5	ENSG00000134982	APC	Protein coding	104871	4.92084642586767	0.00018418775923312	0.0237790451617488	17.8406	23.9353	7.87376	21.488	30.2928	13.358	18.6732	63.2013	2954.54	21.6538	21	23	8	25	29	13	19	56	3532	21	2954.54	9	YES	NO	UP in Preeclampsia
ENST00000508775.5	ENSG00000026297	RNASET2	Protein coding	27199	-4.32216558942949	1.08623748340331e-05	0.00186005992752371	1250.54	217.499	44.2899	2415.26	149.375	47.2669	19.6559	12.4145	95.3616	28.8718	1472	209	45	2810	143	46	20	11	114	28	2415.26	10	YES	NO	DOWN in Preeclampsia
ENST00000509603.6	ENSG00000141068	KSR1	Protein coding	145733	5.84199811275256	1.12225478187145e-05	0.0019197337059309	10.1946	0	2.95266	0	0	75.0104	51.1055	190.732	434.146	12.3736	12	0	3	0	0	73	52	169	519	12	434.146	6	YES	NO	UP in Preeclampsia
ENST00000509784.1	ENSG00000136436	CALCOCO2	Protein coding	7025	-2.45199449523921	3.14280944852026e-05	0.00496733283943311	22.9379	15.61	26.5739	10.3143	11.4904	5.1377	0.982797	3.38578	3.34602	3.0934	27	15	27	12	11	5	1	3	4	3	26.5739	5	YES	YES	DOWN in Preeclampsia
ENST00000510175.5	ENSG00000250312	ZNF718	Protein coding	39510	-11.0603510057502	2.1549496818948e-05	0.00353175176508384	576.845	637.928	0	0	742.696	0	0	0	0	0	679	613	0	0	711	0	0	0	0	0	742.696	3	YES	NO	DOWN in Preeclampsia
ENST00000510835.5	ENSG00000164120	HPGD	Protein coding	31372	-5.78539314334875	0.000204391510624268	0.0256807690066534	73.9109	243.516	88.5798	13159.3	26.1145	58.5698	64.8646	0	47.6808	75.2728	87	234	90	15310	25	57	66	0	57	73	13159.3	9	YES	NO	DOWN in Preeclampsia
ENST00000511224.5	ENSG00000250722	SELENOP	Protein coding	11781	-2.57306801153658	6.13934250112386e-05	0.00907462238388441	29.7343	34.342	5.90532	22.3476	34.4711	5.1377	4.91399	1.12859	6.69204	3.0934	35	33	6	26	33	5	5	1	8	3	34.4711	4	YES	NO	DOWN in Preeclampsia
ENST00000512018.5	ENSG00000152953	STK32B	Protein coding	447854	-7.21065438567679	0.000312839748515369	0.0364871575438188	0	1.04067	60.0374	55.8689	18.8024	0	0	0	0	0	0	1	61	65	18	0	0	0	0	0	60.0374	3	YES	NO	DOWN in Preeclampsia
ENST00000512147.5	ENSG00000080822	CLDND1	Protein coding	6189	4.40601047337036	1.26892669702796e-05	0.00215269219351795	14.4424	5.20333	4.9211	4.29761	2.08916	372.997	10.8108	145.589	123.803	6.18681	17	5	5	5	2	363	11	129	148	6	372.997	5	YES	NO	UP in Preeclampsia
ENST00000513831.1	ENSG00000145623	OSMR	Protein coding	15169	2.46839641355194	4.03750006249111e-06	0.000727006782085708	158.016	234.15	163.381	96.2665	255.922	1409.79	770.513	221.204	952.779	1667.34	186	225	166	112	245	1372	784	196	1139	1617	1667.34	10	YES	YES	UP in Preeclampsia
ENST00000514189.5	ENSG00000142611	PRDM16	Protein coding	365132	8.98367366641437	0.000293777719127596	0.0344843384415264	0	0	0	0	0	101.726	0	278.763	62.7379	0	0	0	0	0	0	99	0	247	75	0	278.763	3	YES	NO	UP in Preeclampsia
ENST00000515314.5	ENSG00000103018	CYB5B	Protein coding	39101	8.6646603877283	0.000323163831793099	0.0375048184660065	0	0	0	0	0	0	112.039	0	107.073	136.11	0	0	0	0	0	0	114	0	128	132	136.11	3	YES	NO	UP in Preeclampsia
ENST00000517962.1	ENSG00000120896	SORBS3	Protein coding	4368	7.52261574660048	5.50729658473005e-06	0.000977726735731026	0	0	0	0	0	32.8813	38.3291	42.8866	46.8443	0	0	0	0	0	0	32	39	38	56	0	46.8443	4	YES	NO	UP in Preeclampsia
ENST00000518995.5	ENSG00000147677	EIF3H	Protein coding	99918	9.0580047782425	1.95179443274727e-05	0.00323617733638574	0	0	0	0	0	12.3305	2.94839	0	138.86	312.434	0	0	0	0	0	12	3	0	166	303	312.434	3	YES	NO	UP in Preeclampsia
ENST00000520287.5	ENSG00000082556	OPRK1	Protein coding	22200	-3.12738812960845	6.32102008878441e-05	0.00930964373937218	49.2739	31.22	48.2268	31.8023	15.6687	2.05508	11.7936	0	5.01903	1.03113	58	30	49	37	15	2	12	0	6	1	49.2739	6	YES	YES	DOWN in Preeclampsia
ENST00000521398.5	ENSG00000112769	LAMA4	Protein coding	69167	-2.77887068996594	0.000304812261278588	0.0356268042154073	431.571	559.878	42.3215	512.275	30.2928	38.019	57.0023	49.6581	37.6427	47.4322	508	538	43	596	29	37	58	44	45	46	559.878	10	YES	YES	DOWN in Preeclampsia
ENST00000523295.5	ENSG00000104687	GSR	Protein coding	45737	-9.76341234099556	1.02849978739129e-06	0.000195484002414146	537.765	27.0573	0	39.538	192.203	0	0	0	0	0	633	26	0	46	184	0	0	0	0	0	537.765	4	YES	NO	DOWN in Preeclampsia
ENST00000523601.5	ENSG00000104375	STK3	Protein coding	487877	-4.44623891945854	0.000371344306088812	0.0421433443381427	240.423	100.945	9.8422	4714.48	115.948	35.9639	90.4174	7.90016	34.2967	69.086	283	97	10	5485	111	35	92	7	41	67	4714.48	8	YES	NO	DOWN in Preeclampsia
ENST00000523965.5	ENSG00000120896	SORBS3	Protein coding	9818	1.49908902981356	0.00019347499290781	0.0247026993231468	885.231	564.041	725.37	1109.64	776.123	1860.88	1290.41	4476	2293.7	1558.04	1042	542	737	1291	743	1811	1313	3966	2742	1511	4476	10	YES	YES	UP in Preeclampsia
ENST00000524591.6	ENSG00000250305	KIAA1456	Protein coding	84101	-1.99372428576133	0.000199920229342087	0.0252931434684891	259.113	476.625	325.777	311.147	113.859	75.0104	115.97	54.1725	107.073	20.6227	305	458	331	362	109	73	118	48	128	20	476.625	10	YES	YES	DOWN in Preeclampsia
ENST00000524906.5	ENSG00000204839	MROH6	Protein coding	2657	7.96845531465103	1.21025703058672e-05	0.00205954392796776	0	0	0	0	0	18.4957	100.245	0	86.9965	13.4047	0	0	0	0	0	18	102	0	104	13	100.245	4	YES	NO	UP in Preeclampsia
ENST00000525138.5	ENSG00000175274	TP53I11	Protein coding	10370	-6.58052129460293	0.000182701880525149	0.0236429766872174	8.4955	11.4473	18.7002	48.9928	0	0	0	0	0	0	10	11	19	57	0	0	0	0	0	0	48.9928	3	YES	NO	DOWN in Preeclampsia
ENST00000525782.5	ENSG00000149100	EIF3M	Protein coding	17670	-1.00914664190749	6.60617029538306e-07	0.000127031858731524	125.733	125.921	152.554	116.895	123.26	50.3495	75.6754	74.4872	55.2093	64.9615	148	121	155	136	118	49	77	66	66	63	152.554	10	YES	YES	DOWN in Preeclampsia
ENST00000526143.2	ENSG00000186174	BCL9L	Protein coding	27863	2.31515995363678	0.00022926123408996	0.0282648808857245	1775.56	1832.61	917.293	1695.84	830.441	5609.34	13843.7	1153.42	3437.2	11050.7	2090	1761	932	1973	795	5459	14086	1022	4109	10717	13843.7	10	YES	YES	UP in Preeclampsia
ENST00000527011.5	ENSG00000134215	VAV3	Protein coding	393421	26.6158977244183	1.4818472876682e-19	9.73383991545185e-16	0	0	0	0	0	4771.9	0	0	13.3841	1296.14	0	0	0	0	0	4644	0	0	16	1257	4771.9	3	YES	NO	UP in Preeclampsia
ENST00000528425.5	ENSG00000166136	NDUFB8	Protein coding	5838	7.09393468210531	2.89355554736592e-09	5.94710769558619e-07	0	0	0	0	0	12.3305	53.0711	27.0863	11.7111	15.467	0	0	0	0	0	12	54	24	14	15	53.0711	5	YES	YES	UP in Preeclampsia
ENST00000528712.5	ENSG00000136574	GATA4	Protein coding	83042	-7.91557020329293	3.14235033027075e-08	6.32390302127943e-06	0	170.669	785.408	9.45474	452.303	1.02754	0.982797	1.12859	1.67301	1.03113	0	164	798	11	433	1	1	1	2	1	785.408	3	YES	NO	DOWN in Preeclampsia
ENST00000530562.5	ENSG00000166435	XRRA1	Protein coding	141442	-1.7187875939007	9.08472206853126e-06	0.00156874331088335	169.06	96.7819	153.538	121.193	138.929	18.4957	53.0711	65.4584	26.7682	43.3076	199	93	156	141	133	18	54	58	32	42	169.06	10	YES	YES	DOWN in Preeclampsia
ENST00000531548.5	ENSG00000183020	AP2A2	Protein coding	44465	-2.43605476340805	1.48732988228779e-07	2.9356531082877e-05	40.7784	18.732	35.4319	48.9928	56.4073	8.22032	5.89678	5.64297	11.7111	5.15567	48	18	36	57	54	8	6	5	14	5	56.4073	6	YES	YES	DOWN in Preeclampsia
ENST00000531930.5	ENSG00000073921	PICALM	Protein coding	57531	-1.67520728496755	0.000202573427164929	0.0255194780045384	26.3361	82.2126	52.1637	25.7857	48.0507	15.4131	12.7764	12.4145	20.9126	11.3425	31	79	53	30	46	15	13	11	25	11	82.2126	10	YES	YES	DOWN in Preeclampsia
ENST00000532221.5	ENSG00000137501	SYTL2	Protein coding	7214	10.7240038678147	3.46240956368454e-07	6.74483954601599e-05	0	0	0	0	0	86.3134	0	1142.14	231.712	20.6227	0	0	0	0	0	84	0	1012	277	20	1142.14	4	YES	NO	UP in Preeclampsia
ENST00000533455.5	ENSG00000164733	CTSB	Protein coding	23752	8.87068427181913	3.4847683138104e-07	6.78035169380706e-05	2.54865	4.16266	16.7317	2.57857	1.04458	187.012	2.94839	12460.8	1.67301	8.24907	3	4	17	3	1	182	3	11041	2	8	12460.8	3	YES	NO	UP in Preeclampsia
ENST00000533500.5	ENSG00000177106	EPS8L2	Protein coding	13911	6.00845110742111	9.86894964221942e-06	0.00169702531135706	0	0	0	0	0	19.5233	10.8108	1.12859	8.36505	16.4981	0	0	0	0	0	19	11	1	10	16	19.5233	3	YES	NO	UP in Preeclampsia
ENST00000534532.6	ENSG00000151503	NCAPD3	Protein coding	72099	-5.74886064664754	4.38621466885385e-06	0.00078720808796704	1.6991	457.893	57.0848	17.1904	13.5795	1.02754	0.982797	4.51438	1.67301	2.06227	2	440	58	20	13	1	1	4	2	2	457.893	4	YES	NO	DOWN in Preeclampsia
ENST00000534673.5	ENSG00000110719	TCIRG1	Protein coding	5176	-9.18567825776732	0.00020590546666118	0.0258117434535616	97.6983	0	0	279.345	156.687	0	0	0	0	0	115	0	0	325	150	0	0	0	0	0	279.345	3	YES	NO	DOWN in Preeclampsia
ENST00000534898.8	ENSG00000100890	KIAA0391	Protein coding	151496	-5.52063098671741	0.000222515863225621	0.0276198866418633	0	720.141	20.6686	18.9095	631.971	6.16524	0	5.64297	9.20156	9.28021	0	692	21	22	605	6	0	5	11	9	720.141	4	YES	NO	DOWN in Preeclampsia
ENST00000535322.1	ENSG00000151490	PTPRO	Protein coding	6414	-3.01562255358732	0.000442925103140524	0.0484585440290011	34.8316	14.5693	7.87376	15.4714	10.4458	2.05508	0.982797	6.77156	0.836505	0	41	14	8	18	10	2	1	6	1	0	34.8316	4	YES	NO	DOWN in Preeclampsia
ENST00000535378.5	ENSG00000137261	KIAA0319	Protein coding	102052	-3.28512845167465	3.49931701980838e-05	0.00546790314826212	137.627	236.231	127.949	237.228	155.642	19.5233	38.3291	0	28.4412	5.15567	162	227	130	276	149	19	39	0	34	5	237.228	8	YES	YES	DOWN in Preeclampsia
ENST00000535542.5	ENSG00000149716	ORAOV1	Protein coding	8042	1.72272463321356	0.000202641606388569	0.0255194780045384	9.34505	24.976	12.7949	6.87618	16.7133	64.735	47.1743	60.9441	30.1142	28.8718	11	24	13	8	16	63	48	54	36	28	64.735	8	YES	YES	UP in Preeclampsia
ENST00000535718.5	ENSG00000111581	NUP107	Protein coding	55683	-10.5708752865514	7.12004253796365e-05	0.0103472490752152	0	0	1013.75	318.883	61.6302	0	0	0	0	0	0	0	1030	371	59	0	0	0	0	0	1013.75	3	YES	NO	DOWN in Preeclampsia
ENST00000536055.5	ENSG00000197785	ATAD3A	Protein coding	22158	3.79382276361573	2.79372620683906e-05	0.00447154123035767	1.6991	7.28466	5.90532	15.4714	14.6241	9.24786	115.97	34.9864	360.534	102.082	2	7	6	18	14	9	118	31	431	99	360.534	6	YES	NO	UP in Preeclampsia
ENST00000536680.5	ENSG00000121988	ZRANB3	Protein coding	333757	-2.62917349631166	6.56973570784958e-06	0.00115574335432348	70.5127	46.8299	120.075	281.064	137.884	28.7711	23.5871	23.7005	6.69204	23.7161	83	45	122	327	132	28	24	21	8	23	281.064	9	YES	YES	DOWN in Preeclampsia
ENST00000536974.5	ENSG00000052126	PLEKHA5	Protein coding	124739	-5.52251404446064	0.000225394564307302	0.0278718709046811	717.87	161.303	11.8106	138.383	20.8916	0	12.7764	10.1573	0	0	845	155	12	161	20	0	13	9	0	0	717.87	7	YES	NO	DOWN in Preeclampsia
ENST00000537365.1	ENSG00000146070	PLA2G7	Protein coding	31377	-8.07001768494427	0.000246615819867456	0.0299406223980096	385.696	757.605	0	1619.34	0	0	6.87958	0	3.34602	0	454	728	0	1884	0	0	7	0	4	0	1619.34	3	YES	NO	DOWN in Preeclampsia
ENST00000538296.5	ENSG00000157895	C12orf43	Protein coding	12214	6.14413850900522	0.000246594617695652	0.0299406223980096	0	0	0	0	0	0	6.87958	15.8003	17.5666	21.6538	0	0	0	0	0	0	7	14	21	21	21.6538	3	YES	NO	UP in Preeclampsia
ENST00000538366.5	ENSG00000075945	KIFAP3	Protein coding	153408	4.45608108147285	2.04878056961742e-05	0.00337459024655399	16.1415	21.854	7.87376	22.3476	24.0253	968.971	5.89678	18.0575	735.288	295.936	19	21	8	26	23	943	6	16	879	287	968.971	8	YES	NO	UP in Preeclampsia
ENST00000539214.5	ENSG00000065154	OAT	Protein coding	21674	4.49068976205563	0.000288290471362315	0.0339129546032784	12.7433	43.708	19.6844	0.859522	19.847	1105.63	989.677	29.3434	43.4983	6.18681	15	42	20	1	19	1076	1007	26	52	6	1105.63	8	YES	NO	UP in Preeclampsia
ENST00000539291.6	ENSG00000183484	GPR132	Protein coding	15071	-4.77059048202685	2.60315659410973e-05	0.00421167654750258	12.7433	5.20333	11.8106	56.7284	18.8024	2.05508	0	0	1.67301	0	15	5	12	66	18	2	0	0	2	0	56.7284	4	YES	NO	DOWN in Preeclampsia
ENST00000539396.5	ENSG00000090372	STRN4	Protein coding	26924	9.87985154920731	8.50160906506489e-05	0.0120568615023729	0	0	0	0	0	0	285.994	209.918	0	328.932	0	0	0	0	0	0	291	186	0	319	328.932	3	YES	NO	UP in Preeclampsia
ENST00000539745.1	ENSG00000197837	HIST4H4	Protein coding	577	-2.03372563844004	3.10094807481738e-06	0.000566442147886941	489.341	1331.01	904.498	1372.66	951.612	312.372	416.706	145.589	220.001	138.172	576	1279	919	1597	911	304	424	129	263	134	1372.66	10	YES	YES	DOWN in Preeclampsia
ENST00000540013.5	ENSG00000020922	MRE11	Protein coding	18619	-1.55157929744262	8.64734586735806e-05	0.0122207387577092	114.689	125.921	222.434	271.609	206.827	102.754	42.2603	40.6294	74.449	60.8369	135	121	226	316	198	100	43	36	89	59	271.609	10	YES	YES	DOWN in Preeclampsia
ENST00000540387.5	ENSG00000044115	CTNNA1	Protein coding	59376	-7.13405661893492	4.19062345316603e-05	0.00641955039395541	19.5397	0	53.1479	45.5547	10.4458	0	0	0	0	0	23	0	54	53	10	0	0	0	0	0	53.1479	4	YES	NO	DOWN in Preeclampsia
ENST00000540494.5	ENSG00000143870	PDIA6	Protein coding	29447	5.59342424369938	7.39029894739227e-05	0.0106645001102185	36.5307	39.5453	25.5897	49.8523	14.6241	33.9088	7882.04	25.9577	25.0952	56.7124	43	38	26	58	14	33	8020	23	30	55	7882.04	10	YES	NO	UP in Preeclampsia
ENST00000541134.5	ENSG00000095951	HIVEP1	Protein coding	152661	12.1826384653806	1.2278521244679e-06	0.00023283535817075	0	0	0	0.859522	0	1439.58	0	2655.58	0	82.4907	0	0	0	1	0	1401	0	2353	0	80	2655.58	3	YES	NO	UP in Preeclampsia
ENST00000541779.5	ENSG00000198121	LPAR1	Protein coding	161887	-5.4881177553312	5.68313331164347e-08	1.13398880458258e-05	2638.7	22.8946	1416.29	60.1665	2688.75	26.716	30.4667	23.7005	21.7491	49.4944	3106	22	1439	70	2574	26	31	21	26	48	2688.75	10	YES	NO	DOWN in Preeclampsia
ENST00000541931.5	ENSG00000151743	AMN1	Protein coding	56941	1.31733870428346	4.14680183563179e-05	0.00637024793118599	32.2829	28.098	19.6844	16.3309	30.2928	52.4046	92.383	58.6869	56.0458	55.6813	38	27	20	19	29	51	94	52	67	54	92.383	10	YES	YES	UP in Preeclampsia
ENST00000542139.1	ENSG00000172613	RAD9A	Protein coding	3832	-2.84790463896692	2.13777949330877e-05	0.0035106187283218	9.34505	20.8133	14.7633	15.4714	11.4904	3.08262	1.96559	0	0.836505	4.12454	11	20	15	18	11	3	2	0	1	4	20.8133	4	YES	NO	DOWN in Preeclampsia
ENST00000542778.5	ENSG00000185049	NELFA	Protein coding	26519	-3.30766130219624	3.38108138610149e-05	0.00531324806758675	67.964	41.6266	215.544	11.1738	24.0253	7.19278	3.93119	9.02875	5.01903	11.3425	80	40	219	13	23	7	4	8	6	11	215.544	6	YES	NO	DOWN in Preeclampsia
ENST00000543227.5	ENSG00000213020	ZNF611	Protein coding	32242	-2.36352865993342	0.000207362947063612	0.0259350559336574	135.078	1807.64	758.834	1330.54	845.065	106.864	144.471	313.749	113.765	269.126	159	1737	771	1548	809	104	147	278	136	261	1807.64	10	YES	YES	DOWN in Preeclampsia
ENST00000543601.5	ENSG00000154783	FGD5	Protein coding	115604	2.12899361210383	0.000268813203866614	0.0320580731391196	198.795	275.776	45.2741	164.169	315.463	759.352	743.978	288.92	1016.35	1562.17	234	265	46	191	302	739	757	256	1215	1515	1562.17	10	YES	YES	UP in Preeclampsia
ENST00000543801.5	ENSG00000183793	NPIPA5	Protein coding	13419	-1.44801140622253	0.000101911996596644	0.0141469013162365	111.291	40.586	122.043	105.721	118.037	28.7711	31.4495	51.9153	32.6237	38.152	131	39	124	123	113	28	32	46	39	37	122.043	10	YES	YES	DOWN in Preeclampsia
ENST00000543939.5	ENSG00000111652	COPS7A	Protein coding	7706	5.62672536769986	7.36642233740056e-05	0.0106487600651694	0.84955	0	0	0.859522	1.04458	5.1377	39.3119	0	49.3538	44.3388	1	0	0	1	1	5	40	0	59	43	49.3538	3	YES	NO	UP in Preeclampsia
ENST00000544137.5	ENSG00000033627	ATP6V0A1	Protein coding	63675	-6.63998654666862	9.91663928350389e-05	0.0138241992347915	45.8757	2430.99	241.134	0.859522	1.04458	0	10.8108	14.6717	0.836505	1.03113	54	2336	245	1	1	0	11	13	1	1	2430.99	5	YES	NO	DOWN in Preeclampsia
ENST00000545673.5	ENSG00000078043	PIAS2	Protein coding	99315	-6.48707094971908	4.0037127249504e-05	0.0061677457435826	18.6901	23.9353	21.6528	0	58.4965	0	0	0	0	1.03113	22	23	22	0	56	0	0	0	0	1	58.4965	4	YES	NO	DOWN in Preeclampsia
ENST00000548912.5	ENSG00000089159	PXN	Protein coding	3333	3.34917485802307	0.000206283927668221	0.0258394615055834	2.54865	6.24399	1.96844	2.57857	3.13374	8.22032	15.7248	3.38578	75.2855	63.9303	3	6	2	3	3	8	16	3	90	62	75.2855	3	YES	NO	UP in Preeclampsia
ENST00000551137.5	ENSG00000062485	CS	Protein coding	17851	-7.44137413317835	1.35998211214688e-10	2.83778325911736e-08	35.6811	37.464	8.85798	54.1499	22.9807	0	0	0	0	0	42	36	9	63	22	0	0	0	0	0	54.1499	4	YES	NO	DOWN in Preeclampsia
ENST00000551946.5	ENSG00000258311	AC009779.3	Protein coding	6383	-5.23773762976681	1.45880633602492e-05	0.00246717053439073	11.8937	13.5287	1.96844	8.59522	15.6687	0	0.982797	0	0	0	14	13	2	10	15	0	1	0	0	0	15.6687	3	YES	NO	DOWN in Preeclampsia
ENST00000555167.1	ENSG00000100968	NFATC4	Protein coding	6790	1.83952964110817	2.97775392548766e-05	0.00473837978813694	50.1235	74.9279	49.211	41.2571	66.8531	292.849	228.992	188.475	59.3919	240.254	59	72	50	48	64	285	233	167	71	233	292.849	10	YES	YES	UP in Preeclampsia
ENST00000555330.5	ENSG00000119682	AREL1	Protein coding	24389	-27.3732787901348	1.21775304089653e-23	6.66589896233154e-19	2364.3	2191.64	2271.58	0	0	0	0	0	0	0	2783	2106	2308	0	0	0	0	0	0	0	2364.3	3	YES	NO	DOWN in Preeclampsia
ENST00000555339.5	ENSG00000100519	PSMC6	Protein coding	11121	4.67677060732951	0.000414502715355714	0.0460191793240762	0.84955	1.04067	0.98422	0.859522	1.04458	0	1.96559	23.7005	11.7111	84.553	1	1	1	1	1	0	2	21	14	82	84.553	3	YES	NO	UP in Preeclampsia
ENST00000555497.5	ENSG00000070269	TMEM260	Protein coding	68027	-1.76130941903114	0.000393324911992444	0.0441862544020991	164.813	52.0333	95.4694	94.5474	141.018	59.5973	24.5699	13.5431	21.7491	42.2765	194	50	97	110	135	58	25	12	26	41	164.813	10	YES	YES	DOWN in Preeclampsia
ENST00000556564.5	ENSG00000070778	PTPN21	Protein coding	88953	-1.35874928302258	4.71563466356669e-05	0.00713725431503774	4417.66	4536.26	5062.83	5441.63	3825.25	3185.37	1052.58	1310.3	1724.04	1806.55	5200	4359	5144	6331	3662	3100	1071	1161	2061	1752	5441.63	10	YES	YES	DOWN in Preeclampsia
ENST00000558476.5	ENSG00000092330	TINF2	Protein coding	1983	-8.75752244788886	0.000411154433148948	0.0457445519667032	0	148.815	43.3057	204.566	0	0	0	0	0	0	0	143	44	238	0	0	0	0	0	0	204.566	3	YES	NO	DOWN in Preeclampsia
ENST00000558648.5	ENSG00000250021	C15orf38-AP3S2	Protein coding	70778	-8.91397706171532	4.36725105353778e-07	8.47731954503388e-05	193.697	52.0333	111.217	85.0927	0	0	0	0	0	0	228	50	113	99	0	0	0	0	0	0	193.697	4	YES	NO	DOWN in Preeclampsia
ENST00000558777.5	ENSG00000137824	RMDN3	Protein coding	19359	-25.9996325312024	8.75564887865123e-22	1.79729393444294e-17	2048.27	198.767	474.394	0	0	0	0	0	0	0	2411	191	482	0	0	0	0	0	0	0	2048.27	3	YES	NO	DOWN in Preeclampsia
ENST00000558850.5	ENSG00000022976	ZNF839	Protein coding	24988	9.27012720878566	1.50792021535753e-06	0.000283326821425152	0	0	0	0	0	247.637	106.142	0	8.36505	178.386	0	0	0	0	0	241	108	0	10	173	247.637	3	YES	NO	UP in Preeclampsia
ENST00000558966.5	ENSG00000137770	CTDSPL2	Protein coding	96751	2.51642106897556	3.78218983770737e-05	0.00585394581308793	21.2388	22.8946	4.9211	4.29761	10.4458	53.4321	57.0023	121.888	31.7872	101.051	25	22	5	5	10	52	58	108	38	98	121.888	8	YES	YES	UP in Preeclampsia
ENST00000559528.1	ENSG00000181026	AEN	Protein coding	5377	5.22768510193617	0.000299407107212454	0.0350949581243503	0	0	0	2.57857	0	29.7987	4.91399	1.12859	31.7872	34.0274	0	0	0	3	0	29	5	1	38	33	34.0274	3	YES	NO	UP in Preeclampsia
ENST00000560466.5	ENSG00000182718	ANXA2	Protein coding	46254	2.62728378941678	0.000270793445757808	0.0322473952686408	54.3712	20.8133	72.8323	47.2737	22.9807	175.709	49.1399	92.5447	350.496	681.58	64	20	74	55	22	171	50	82	419	661	681.58	10	YES	NO	UP in Preeclampsia
ENST00000560471.5	ENSG00000138606	SHF	Protein coding	17290	3.13643049405923	2.80728911124417e-05	0.00448887442327454	15.2919	5.20333	19.6844	8.59522	13.5795	100.699	38.3291	330.678	30.9507	48.4633	18	5	20	10	13	98	39	293	37	47	330.678	8	YES	NO	UP in Preeclampsia
ENST00000561068.5	ENSG00000182774	RPS17	Protein coding	3373	-5.19359746650187	0.000414766737502694	0.0460191793240762	8701.94	15.61	29.5266	32.6618	19.847	71.9278	36.3635	59.8155	30.1142	42.2765	10243	15	30	38	19	70	37	53	36	41	8701.94	10	YES	NO	DOWN in Preeclampsia
ENST00000563468.5	ENSG00000103342	GSPT1	Protein coding	25205	2.69030834019582	0.000132329333849669	0.0178414273777709	442.616	323.647	260.818	320.602	202.648	347.309	3607.85	2958.04	2793.09	301.091	521	311	265	373	194	338	3671	2621	3339	292	3607.85	10	YES	YES	UP in Preeclampsia
ENST00000564374.5	ENSG00000103494	RPGRIP1L	Protein coding	98495	2.84463440773976	4.38064938622485e-05	0.00668570149541889	13.5928	37.464	8.85798	33.5214	6.26748	200.37	50.1227	258.448	45.1713	162.919	16	36	9	39	6	195	51	229	54	158	258.448	8	YES	YES	UP in Preeclampsia
ENST00000564563.1	ENSG00000090857	PDPR	Protein coding	12521	4.89673417644631	3.55440291549991e-05	0.00554844998077532	11.0442	14.5693	20.6686	24.0666	20.8916	587.753	2075.67	18.0575	16.7301	19.5916	13	14	21	28	20	572	2112	16	20	19	2075.67	10	YES	NO	UP in Preeclampsia
ENST00000567140.3	ENSG00000260238	PMF1-BGLAP	Protein coding	30206	3.93359338750678	0.000304555809945303	0.0356221837589727	0	0	1.96844	1.71904	1.04458	15.4131	32.4323	18.0575	2.50952	4.12454	0	0	2	2	1	15	33	16	3	4	32.4323	3	YES	NO	UP in Preeclampsia
ENST00000568426.1	ENSG00000184110	EIF3C	Protein coding	1630	-5.40078893002249	1.75747119579352e-05	0.00293301224421566	105.344	1.04067	173.223	105.721	1.04458	4.11016	0.982797	2.25719	0.836505	1.03113	124	1	176	123	1	4	1	2	1	1	173.223	3	YES	NO	DOWN in Preeclampsia
ENST00000568995.1	ENSG00000174943	KCTD13	Protein coding	16885	-5.72641732370695	0.000440441548590349	0.0482833312592856	9.34505	0	14.7633	12.8928	11.4904	0	0	0	0	0	11	0	15	15	11	0	0	0	0	0	14.7633	3	YES	NO	DOWN in Preeclampsia
ENST00000569051.1	ENSG00000185164	NOMO2	Protein coding	12204	-3.77284848075626	2.28977343828321e-19	1.34293576602855e-15	295.643	315.322	330.698	469.299	294.571	35.9639	31.4495	11.2859	35.1332	10.3113	348	303	336	546	282	35	32	10	42	10	469.299	10	YES	YES	DOWN in Preeclampsia
ENST00000570932.5	ENSG00000181409	AATK	Protein coding	4208	-8.77994683213858	0.000319659878572822	0.0371506765318271	131.68	0	124.996	0	146.241	0	0	0	0	0	155	0	127	0	140	0	0	0	0	0	146.241	3	YES	NO	DOWN in Preeclampsia
ENST00000572430.5	ENSG00000108523	RNF167	Protein coding	5051	25.0079925074182	1.03234754884705e-19	7.70591135348019e-16	0	0	0	0	0	0	1707.12	120.76	0	84.553	0	0	0	0	0	0	1737	107	0	82	1707.12	3	YES	NO	UP in Preeclampsia
ENST00000573026.1	ENSG00000108953	YWHAE	Protein coding	55327	-1.73747805835819	4.91656623980924e-05	0.00741403741752978	353.413	448.527	474.394	260.435	116.993	135.635	93.3658	59.8155	98.7076	108.269	416	431	482	303	112	132	95	53	118	105	474.394	10	YES	YES	DOWN in Preeclampsia
ENST00000573028.5	ENSG00000141252	VPS53	Protein coding	182889	-1.41944796121732	7.65263826409024e-05	0.01098514816829	564.101	755.523	613.169	552.673	222.495	245.582	204.422	138.817	187.377	236.13	664	726	623	643	213	239	208	123	224	229	755.523	10	YES	YES	DOWN in Preeclampsia
ENST00000573692.1	ENSG00000167978	SRRM2	Protein coding	1056	7.74423796976977	2.47520801062758e-14	1.64564254692e-11	0	0	0	0	0	56.5147	32.4323	33.8578	25.9317	39.1831	0	0	0	0	0	55	33	30	31	38	56.5147	5	YES	YES	UP in Preeclampsia
ENST00000575068.5	ENSG00000073969	NSF	Protein coding	132024	-2.96759644796765	2.64852355911473e-05	0.00425989463105487	126.583	1388.25	636.791	1077.84	96.1013	85.2858	76.6582	66.587	90.3426	106.207	149	1334	647	1254	92	83	78	59	108	103	1388.25	10	YES	NO	DOWN in Preeclampsia
ENST00000580864.5	ENSG00000087191	PSMC5	Protein coding	4560	8.90972756592442	0.000255299223166692	0.0307591546808422	0	0	0	0	0	0	0	132.045	167.301	121.674	0	0	0	0	0	0	0	117	200	118	167.301	3	YES	NO	UP in Preeclampsia
ENST00000581227.1	ENSG00000169683	LRRC45	Protein coding	3626	-1.9685307728307	0.000113468785878102	0.0156322290933978	42.4775	55.1553	20.6686	67.9022	25.0699	5.1377	13.7592	6.77156	11.7111	16.4981	50	53	21	79	24	5	14	6	14	16	67.9022	8	YES	YES	DOWN in Preeclampsia
ENST00000581484.5	ENSG00000169696	ASPSCR1	Protein coding	20037	-10.982875115406	2.33960402823175e-05	0.00381534353831342	447.713	461.015	0	946.334	0	0	0	0	0	0	527	443	0	1101	0	0	0	0	0	0	946.334	3	YES	NO	DOWN in Preeclampsia
ENST00000583897.5	ENSG00000181396	OGFOD3	Protein coding	23291	-9.26554062251292	0.000173088123344689	0.0225231263386832	158.016	0	131.886	274.188	0	0	0	0	0	0	186	0	134	319	0	0	0	0	0	0	274.188	3	YES	NO	DOWN in Preeclampsia
ENST00000585682.5	ENSG00000164125	FAM198B	Protein coding	48577	4.96828897825477	4.53345784033526e-05	0.00689329055207571	5.94685	2.08133	18.7002	2.57857	22.9807	55.4872	1187.22	318.263	1.67301	71.1483	7	2	19	3	22	54	1208	282	2	69	1187.22	6	YES	NO	UP in Preeclampsia
ENST00000585893.5	ENSG00000108799	EZH1	Protein coding	42647	1.2523996774066	8.68730220279539e-05	0.0122561116249025	97.6983	81.1719	161.412	101.424	82.5218	270.243	333.168	252.805	248.442	144.359	115	78	164	118	79	263	339	224	297	140	333.168	10	YES	YES	UP in Preeclampsia
ENST00000586617.1	ENSG00000196365	LONP1	Protein coding	12335	5.87424339165317	0.000274347501688036	0.0325525997342529	0	0	0	0	0	16.4406	11.7936	0	11.7111	11.3425	0	0	0	0	0	16	12	0	14	11	16.4406	4	YES	NO	UP in Preeclampsia
ENST00000586945.5	ENSG00000160439	RDH13	Protein coding	12877	7.06112095115901	3.4807339097836e-05	0.00545419046943553	0	0	0	0	0	17.4682	54.0539	0	13.3841	31.9652	0	0	0	0	0	17	55	0	16	31	54.0539	4	YES	NO	UP in Preeclampsia
ENST00000586984.6	ENSG00000121289	CEP89	Protein coding	92947	-9.85625215337443	5.78993594321117e-08	1.15389769505128e-05	417.979	0	143.696	133.226	154.598	0	0	0	0	0	492	0	146	155	148	0	0	0	0	0	417.979	4	YES	NO	DOWN in Preeclampsia
ENST00000590645.1	ENSG00000154262	ABCA6	Protein coding	6659	-1.85220771182798	0.000185030416397246	0.0238690690651397	124.884	108.229	125.98	92.8284	211.005	46.2393	56.0195	20.3147	50.1903	10.3113	147	104	128	108	202	45	57	18	60	10	211.005	10	YES	YES	DOWN in Preeclampsia
ENST00000590973.1	ENSG00000141431	ASXL3	Protein coding	54060	-5.46708397755978	0.000367274029899984	0.0417391049426405	20.3892	0	27.5582	17.1904	25.0699	2.05508	0	0	0	0	24	0	28	20	24	2	0	0	0	0	27.5582	4	YES	NO	DOWN in Preeclampsia
ENST00000591834.1	ENSG00000267281	AC023509.3	Protein coding	119289	7.25295645844319	1.22790652506818e-05	0.00208741567012056	0	0	0	0	0	0	36.3635	42.8866	32.6237	21.6538	0	0	0	0	0	0	37	38	39	21	42.8866	4	YES	NO	UP in Preeclampsia
ENST00000592211.1	ENSG00000186814	ZSCAN30	Protein coding	26020	-6.40433265296129	0.000200552933127998	0.0253536578694485	21.2388	10.4067	0	9.45474	36.5603	0	0	0	0	0	25	10	0	11	35	0	0	0	0	0	36.5603	3	YES	NO	DOWN in Preeclampsia
ENST00000593255.5	ENSG00000125746	EML2	Protein coding	7226	5.73717784984741	2.6830064170655e-06	0.00049339075901194	0	0	0	0	1.04458	11.3029	16.7076	13.5431	2.50952	25.7784	0	0	0	0	1	11	17	12	3	25	25.7784	4	YES	NO	UP in Preeclampsia
ENST00000593587.5	ENSG00000105323	HNRNPUL1	Protein coding	41847	-6.91430760299731	6.59699079218924e-06	0.00115865736247244	5116.84	2444.52	21.6528	22.3476	14.6241	21.5783	2.94839	0	6.69204	31.9652	6023	2349	22	26	14	21	3	0	8	31	5116.84	7	YES	NO	DOWN in Preeclampsia
ENST00000594083.5	ENSG00000197619	ZNF615	Protein coding	16863	-6.67592745716112	5.61908432961938e-08	1.1225727377633e-05	60.3181	325.728	3.93688	6.87618	416.787	1.02754	3.93119	1.12859	0.836505	1.03113	71	313	4	8	399	1	4	1	1	1	416.787	3	YES	NO	DOWN in Preeclampsia
ENST00000594090.5	ENSG00000105053	VRK3	Protein coding	37079	-4.75327629254347	3.0337692567861e-05	0.00481352193054009	0.84955	24.976	28.5424	24.9261	30.2928	2.05508	0.982797	1.12859	0	0	1	24	29	29	29	2	1	1	0	0	30.2928	4	YES	NO	DOWN in Preeclampsia
ENST00000598953.1	ENSG00000171049	FPR2	Protein coding	8802	-7.34956993360302	1.46124739492007e-05	0.00246875642694428	45.8757	0	56.1006	17.1904	30.2928	0	0	0	0	0	54	0	57	20	29	0	0	0	0	0	56.1006	4	YES	NO	DOWN in Preeclampsia
ENST00000600079.5	ENSG00000213023	SYT3	Protein coding	17842	-8.01526785773073	2.60927290542856e-05	0.00421741710613846	102.796	17.6913	108.264	0	8.35664	0	0	0	0	0	121	17	110	0	8	0	0	0	0	0	108.264	3	YES	NO	DOWN in Preeclampsia
ENST00000602377.1	ENSG00000141098	GFOD2	Protein coding	44809	2.59844790940345	0.000375479870832689	0.0425538671003468	8.4955	7.28466	5.90532	1.71904	1.04458	18.4957	25.5527	51.9153	45.1713	7.21794	10	7	6	2	1	18	26	46	54	7	51.9153	4	YES	NO	UP in Preeclampsia
ENST00000602959.5	ENSG00000170035	UBE2E3	Protein coding	82657	6.60230588767833	9.08709690298801e-08	1.80443153472175e-05	2.54865	1.04067	9.8422	0.859522	1.04458	469.586	457.001	524.796	0.836505	36.0897	3	1	10	1	1	457	465	465	1	35	524.796	4	YES	NO	UP in Preeclampsia
ENST00000610452.1	ENSG00000204291	COL15A1	Protein coding	127080	5.41183804983496	0.000158732346665654	0.0210215391167261	25.4865	65.5619	50.1952	30.0833	84.6109	10693.6	61.9162	10.1573	73.6125	53.619	30	63	51	35	81	10407	63	9	88	52	10693.6	10	YES	NO	UP in Preeclampsia
ENST00000610712.1	ENSG00000186814	ZSCAN30	Protein coding	39188	-7.27022323996098	3.96096510709715e-06	0.000714793151601407	0.84955	91.5786	111.217	0.859522	404.252	1.02754	0	0	0.836505	2.06227	1	88	113	1	387	1	0	0	1	2	404.252	3	YES	NO	DOWN in Preeclampsia
ENST00000610907.1	ENSG00000070756	PABPC1	Protein coding	17211	-1.2285844241342	0.000285170467621946	0.03369073658413	119.787	96.7819	78.7376	107.44	88.7893	21.5783	39.3119	71.1014	39.3157	39.1831	141	93	80	125	85	21	40	63	47	38	119.787	10	YES	YES	DOWN in Preeclampsia
ENST00000611084.4	ENSG00000116141	MARK1	Protein coding	136274	3.60363126057444	2.00567400880817e-05	0.00331355909837485	1.6991	9.36599	38.3846	4.29761	7.31206	57.5423	97.2969	384.851	76.9585	123.736	2	9	39	5	7	56	99	341	92	120	384.851	6	YES	NO	UP in Preeclampsia
ENST00000612316.4	ENSG00000130518	KIAA1683	Protein coding	17413	6.9569587572947	0.000227922587959819	0.0281209553340237	0	0	0.98422	4.29761	0	343.198	0.982797	292.306	29.2777	0	0	0	1	5	0	334	1	259	35	0	343.198	3	YES	NO	UP in Preeclampsia
ENST00000612692.4	ENSG00000100523	DDHD1	Protein coding	116354	-27.0112254306771	3.67664187548521e-23	1.05593788761642e-18	0	922.03	1331.65	2995.43	0	0	0	0	0	0	0	886	1353	3485	0	0	0	0	0	0	2995.43	3	YES	NO	DOWN in Preeclampsia
ENST00000615418.4	ENSG00000276070	CCL4L2	Protein coding	1955	-5.11647742302171	5.8178139723767e-07	0.000112398797048913	33.982	27.0573	10.8264	30.0833	35.5157	0	3.93119	0	0	0	40	26	11	35	34	0	4	0	0	0	35.5157	5	YES	YES	DOWN in Preeclampsia
ENST00000615625.1	ENSG00000083535	PIBF1	Protein coding	233756	-3.50930581326741	0.000193373013500466	0.0247026993231468	52.6721	63.4806	23.6213	19.769	87.7447	13.358	0	0	4.18253	4.12454	62	61	24	23	84	13	0	0	5	4	87.7447	6	YES	YES	DOWN in Preeclampsia
ENST00000616623.4	ENSG00000121671	CRY2	Protein coding	35843	4.52078040513753	5.66307498400254e-06	0.00100213237901178	54.3712	44.7486	42.3215	41.2571	54.3181	2191.74	203.439	2917.42	36.8062	91.771	64	43	43	48	52	2133	207	2585	44	89	2917.42	10	YES	NO	UP in Preeclampsia
ENST00000616918.1	ENSG00000175707	KDF1	Protein coding	10821	8.93615933060394	0.000241684336296013	0.0295524336097236	0	0	0	0	0	0	175.921	0	92.0156	160.857	0	0	0	0	0	0	179	0	110	156	175.921	3	YES	NO	UP in Preeclampsia
ENST00000617071.4	ENSG00000271605	MILR1	Protein coding	8463	-3.29293977880953	0.000382627328589176	0.0431850822311047	124.034	9.36599	33.4635	47.2737	5.2229	3.08262	3.93119	1.12859	10.8746	3.0934	146	9	34	55	5	3	4	1	13	3	124.034	4	YES	NO	DOWN in Preeclampsia
ENST00000617267.4	ENSG00000136250	AOAH	Protein coding	211448	-9.71255411169483	5.32529339676605e-08	1.06777659466438e-05	194.547	0	258.85	96.2665	219.362	0	0	0	0	0	229	0	263	112	210	0	0	0	0	0	258.85	4	YES	NO	DOWN in Preeclampsia
ENST00000617306.1	ENSG00000149534	MS4A2	Protein coding	9803	-5.08590857731728	9.55762225963999e-05	0.0133691108367424	16.991	12.488	8.85798	193.392	40.7386	4.11016	3.93119	0	0	0	20	12	9	225	39	4	4	0	0	0	193.392	4	YES	NO	DOWN in Preeclampsia
ENST00000617773.1	ENSG00000005108	THSD7A	Protein coding	461762	-7.39781024654348	5.24870348801926e-08	1.05370609950556e-05	16501.7	19077.5	377.941	18037.1	53.2736	136.663	59.9506	0	92.8521	30.934	19424	18332	384	20985	51	133	61	0	111	30	19077.5	9	YES	YES	DOWN in Preeclampsia
ENST00000618160.4	ENSG00000111358	GTF2H3	Protein coding	28865	6.0125800653507	6.94076619612552e-07	0.000133154058784503	11.0442	2.08133	3.93688	6.87618	1.04458	1.02754	577.885	657.97	15.0571	371.208	13	2	4	8	1	1	588	583	18	360	657.97	5	YES	YES	UP in Preeclampsia
ENST00000618240.4	ENSG00000088280	ASAP3	Protein coding	56002	-11.503177128883	5.61026398093717e-08	1.122175798321e-05	48.4244	2178.11	0	5969.38	400.074	0	2.94839	0	0	0	57	2093	0	6945	383	0	3	0	0	0	5969.38	4	YES	NO	DOWN in Preeclampsia
ENST00000620264.4	ENSG00000274209	ANTXRL	Protein coding	43132	-6.29406268782044	0.000279785730862524	0.0331260657179394	23.7874	6.24399	10.8264	30.9428	0	0	0	0	0	0	28	6	11	36	0	0	0	0	0	0	30.9428	3	YES	NO	DOWN in Preeclampsia
ENST00000620429.4	ENSG00000160695	VPS11	Protein coding	12432	-3.98624760640803	0.000235213569398542	0.0288686860534303	660.1	46.8299	687.97	1268.65	16.7133	72.9554	1.96559	54.1725	13.3841	26.8095	777	45	699	1476	16	71	2	48	16	26	1268.65	9	YES	NO	DOWN in Preeclampsia
ENST00000620633.4	ENSG00000139679	LPAR6	Protein coding	4763	5.93153492301496	3.41272257396905e-05	0.00535784393548804	10.1946	5.20333	3.93688	0.859522	9.40122	743.939	974.935	82.3874	4.18253	0	12	5	4	1	9	724	992	73	5	0	974.935	4	YES	NO	UP in Preeclampsia
ENST00000620958.4	ENSG00000112312	GMNN	Protein coding	10681	6.42385739157877	0.00028277065858319	0.0334553544749382	0	0	0	0	0	3.08262	22.6043	0	22.5856	26.8095	0	0	0	0	0	3	23	0	27	26	26.8095	3	YES	NO	UP in Preeclampsia
ENST00000621364.4	ENSG00000185164	NOMO2	Protein coding	62188	2.75210443169012	4.6591344629961e-06	0.000832550319090634	5.0973	7.28466	5.90532	8.59522	22.9807	30.8262	99.2625	30.472	103.727	69.086	6	7	6	10	22	30	101	27	124	67	103.727	6	YES	YES	UP in Preeclampsia
ENST00000621421.4	ENSG00000150459	SAP18	Protein coding	8571	2.51752234320848	0.000388091815155467	0.0437117021270236	16.991	15.61	24.6055	18.9095	14.6241	19.5233	25.5527	60.9441	213.309	200.04	20	15	25	22	14	19	26	54	255	194	213.309	10	YES	NO	UP in Preeclampsia
ENST00000622151.4	ENSG00000114861	FOXP1	Protein coding	12988	3.71038769060942	0.000446574880799807	0.0486956399569606	2.54865	2.08133	1.96844	4.29761	3.13374	3.08262	27.5183	111.731	40.9888	1.03113	3	2	2	5	3	3	28	99	49	1	111.731	3	YES	NO	UP in Preeclampsia
ENST00000624843.3	ENSG00000131089	ARHGEF9	Protein coding	117079	9.2510217681636	0.000246682227919637	0.0299406223980096	0	0	0	0	0	121.25	0	364.536	47.6808	0	0	0	0	0	0	118	0	323	57	0	364.536	3	YES	NO	UP in Preeclampsia
ENST00000624934.3	ENSG00000274276	CBSL	Protein coding	22100	-7.82239466003414	2.04677057584943e-08	4.15471656891028e-06	73.0613	33.3013	80.7061	17.1904	3.13374	0	0	0	0	0	86	32	82	20	3	0	0	0	0	0	80.7061	4	YES	NO	DOWN in Preeclampsia
ENST00000625842.2	ENSG00000156931	VPS8	Protein coding	240394	4.62650015778876	0.000101654967355536	0.0141231602615833	8.4955	2.08133	3.93688	0.859522	1.04458	332.923	37.3463	7.90016	26.7682	3.0934	10	2	4	1	1	324	38	7	32	3	332.923	3	YES	NO	UP in Preeclampsia
ENST00000626689.2	ENSG00000092330	TINF2	Protein coding	3028	-2.45927753538323	0.000156233021267913	0.0207239695368127	14.4424	41.6266	46.2584	58.4475	9.40122	9.24786	8.84518	3.38578	3.34602	6.18681	17	40	47	68	9	9	9	3	4	6	58.4475	4	YES	NO	DOWN in Preeclampsia
ENST00000633136.1	ENSG00000124772	CPNE5	Protein coding	83043	4.04806359825647	0.000423803612206336	0.046771627412164	8.4955	0	3.93688	2.57857	3.13374	2.05508	4.91399	113.988	35.9697	145.39	10	0	4	3	3	2	5	101	43	141	145.39	3	YES	NO	UP in Preeclampsia
ENST00000637174.1	ENSG00000198825	INPP5F	Protein coding	9829	5.06107422232477	0.00025372480051623	0.0305919084369855	9.34505	10.4067	7.87376	10.3143	7.31206	5.1377	8.84518	1478.46	7.52855	11.3425	11	10	8	12	7	5	9	1310	9	11	1478.46	4	YES	NO	UP in Preeclampsia
ENST00000637429.1	ENSG00000104763	ASAH1	Protein coding	28201	-9.52223961310431	0.000329098283049379	0.0380858786792128	0	0	24.6055	588.773	60.5856	0	0	0	0	0	0	0	25	685	58	0	0	0	0	0	588.773	3	YES	NO	DOWN in Preeclampsia
ENST00000637488.2	ENSG00000187695	AC112484.1	Protein coding	24885	-2.92271897158893	3.60269510459598e-06	0.000653731916780711	54.3712	19.7726	21.6528	24.0666	21.9362	6.16524	2.94839	0	3.34602	6.18681	64	19	22	28	21	6	3	0	4	6	54.3712	5	YES	YES	DOWN in Preeclampsia
ENST00000637624.1	ENSG00000089159	PXN	Protein coding	8931	-3.3342560153728	6.02943249397722e-06	0.00106581414994182	6862.67	5393.77	327.745	11454	6202.71	639.13	261.424	341.964	825.631	930.083	8078	5183	333	13326	5938	622	266	303	987	902	11454	10	YES	YES	DOWN in Preeclampsia
ENST00000637718.1	ENSG00000104763	ASAH1	Protein coding	13990	-2.79944714745414	0.000193612066313711	0.0247026993231468	534.367	450.608	69.8796	423.744	53.2736	27.7436	94.3486	14.6717	46.0078	37.1208	629	433	71	493	51	27	96	13	55	36	534.367	10	YES	YES	DOWN in Preeclampsia
ENST00000638587.1	ENSG00000204217	BMPR2	Protein coding	95534	1.22362338209912	0.000139715431867064	0.018732620511247	46.7253	46.8299	23.6213	37.819	43.8723	144.883	85.5034	72.23	84.487	77.3351	55	45	24	44	42	141	87	64	101	75	144.883	10	YES	YES	UP in Preeclampsia
ENST00000640338.1	ENSG00000078269	SYNJ2	Protein coding	112141	4.61984740710535	1.07212111869013e-05	0.00183972399027227	7.64595	2.08133	7.87376	9.45474	1.04458	357.584	10.8108	13.5431	278.556	34.0274	9	2	8	11	1	348	11	12	333	33	357.584	5	YES	NO	UP in Preeclampsia
ENST00000640958.1	ENSG00000172845	SP3	Protein coding	53895	4.87246108596739	7.45902272838856e-05	0.010754221197634	136.778	36.4233	51.1795	54.1499	42.8278	119.195	94.3486	227.976	76.122	8898.69	161	35	52	63	41	116	96	202	91	8630	8898.69	10	YES	NO	UP in Preeclampsia
ENST00000641638.1	ENSG00000167332	OR51E2	Protein coding	4922	5.79165559666859	1.74341087104599e-05	0.00291250708465341	1.6991	1.04067	0.98422	0	0	78.0931	64.8646	3.38578	0.836505	60.8369	2	1	1	0	0	76	66	3	1	59	78.0931	3	YES	NO	UP in Preeclampsia
ENST00000641703.1	ENSG00000108439	PNPO	Protein coding	5631	-9.25877989309158	0.000343661948253045	0.0394330402485786	457.908	0	65.9428	0	37.6049	0	0	0	0	0	539	0	67	0	36	0	0	0	0	0	457.908	3	YES	NO	DOWN in Preeclampsia
ENST00000642090.1	ENSG00000184022	OR2T10	Protein coding	7214	-5.39267411299806	0.000368246700443203	0.0418207030797939	8.4955	242.475	149.601	0	66.8531	4.11016	0	0	5.85554	1.03113	10	233	152	0	64	4	0	0	7	1	242.475	3	YES	NO	DOWN in Preeclampsia

## Sheet: metadata
Group	Sample ID	Sample type	Age (year)	Gestational weeks	BMI(kg/m2)	SBP (mmHg)	DBP (mmHg)
Control	B11	Placental vessel	28	38+5	26.3	106	71
Control	B25	Placental vessel	29	37+4	28.4	112	78
Control	B28	Placental vessel	29	38+6	26.1	118	76
Control	B30	Placental vessel	30	39+1	27.5	116	76
Control	B7	Placental vessel	31	37+6	25.6	108	77
Preeclampsia	D10	Placental vessel	28	36+6	25.8	151	99
Preeclampsia	D26	Placental vessel	29	37+4	26.1	152	95
Preeclampsia	D8	Placental vessel	30	35+4	27.8	167	117
Preeclampsia	D9	Placental vessel	30	36+2	28.2	142	96
Preeclampsia	D_2	Placental vessel	31	37+2	26.8	158	102
