# Supplementary material for: Transcriptomic profiling with vascular tension analyses reveals molecular targets and phenotypes in preeclamptic placental vasculature
Source: Front Endocrinol (Lausanne). 2024 Nov 12;15:1487549. doi: 10.3389/fendo.2024.1487549 (PMC11588436; doi:10.3389/fendo.2024.1487549)
Supplement: Supplementary file 3 [file Table3.xlsx]

## Sheet: phenotype
ID	Name	p-value	Hit Count in Query List	Hit Count in Genome	Hit in Query List	Count	UP in Exp	UP in Exp (count)	DOWN in Exp	DOWN in Exp (count)
MP:0001614	abnormal blood vessel morphology	0.00656	51	1359	PDE6B,HLA-DQB2,MOSPD3,PLA2G15,MEF2C,FANCD2,ADORA2A,MGAT1,EFEMP1,COMMD1,HPGD,PITX2,STRN4,PLEKHA5,FGF9,VAV3,MPV17,FKBP10,SGIP1,COL15A1,COMT,ANXA2,MILR1,MTAP,IGFBP3,ZNF718,PDGFD,RNF38,PRL,IL6ST,IFT140,GATA4,ITGB2,SNX13,BMPR2,PXN,FGD5,RAD9A,RAP1GDS1,RPGRIP1L,LAMA4,MLLT10,RFX5,GSR,LEFTY2,LIPA,FXR1,SETD5,PIERCE1,CEP250,RPGR	51	SNX13;PXN;COL15A1;MLLT10;VAV3;RNF38;IFT140;SETD5;STRN4;COMT;RPGRIP1L;RFX5;PDE6B;ANXA2;FGD5;PITX2;ADORA2A;FKBP10;BMPR2;RAP1GDS1;EFEMP1;SGIP1;COMMD1;CEP250;FGF9	25	ITGB2;PXN;IL6ST;MILR1;PRL;MTAP;MEF2C;MPV17;FXR1;PDGFD;GATA4;PIERCE1;MGAT1;PLEKHA5;FANCD2;ZNF718;LIPA;GSR;HPGD;MOSPD3;RAD9A;IGFBP3;RPGR;PLA2G15;LAMA4;LEFTY2;HLA-DQB2	27
MP:0001711	abnormal placenta morphology	0.00836	22	477	TRRAP,LONP1,COMMD1,KDM6A,CUL4B,COMT,EIF3H,PRL,BCL9L,SP3,PLK2,NDUFB8,SNX13,ARHGEF7,ZPR1,FGD5,RPGRIP1L,MLLT10,SLC7A7,SETD5,ATAD3A,VPS53	22	SNX13;KDM6A;FGD5;MLLT10;BCL9L;LONP1;ATAD3A;COMMD1;COMT;RPGRIP1L;NDUFB8;SP3;EIF3H;TRRAP;ARHGEF7;SETD5	16	CUL4B;PLK2;PRL;ZPR1;VPS53;SLC7A7	6
MP:0002429	abnormal blood cell morphology/development	0.01065	38	976	CTTNBP2,HLA-DQB2,TCIRG1,PICALM,MEF2C,FANCD2,MGAT1,KDM6A,MPV17,MRE11,PMS2,WIPF1,MAP4K3,APC,KLRK1,ASAH1,FOXP1,SIGLEC11,CTSD,IL6ST,SP3,TNFSF13,INPP5D,POGZ,ITGB2,LILRB1,STK4,FBXO4,TINF2,DIAPH1,AGTPBP1,LAMA4,DIDO1,IL18BP,PDIA6,CD22,TLE4,OSMR	38	FOXP1;PDIA6;KDM6A;AGTPBP1;INPP5D;OSMR;DIAPH1;SP3;APC;FBXO4;POGZ	11	ITGB2;IL6ST;MEF2C;MPV17;CTTNBP2;MGAT1;TNFSF13;TINF2;FANCD2;MRE11;TCIRG1;DIDO1;CD22;WIPF1;STK4;SIGLEC11;CTSD;LAMA4;TLE4;PICALM;LILRB1;ASAH1;KLRK1;MAP4K3;IL18BP;HLA-DQB2;PMS2	27
MP:0004875	increased mean systemic arterial blood pressure	0.02454	4	42	VAV3,SMTN,GALC,NR3C1	4	VAV3;SMTN;NR3C1	3	GALC	1
MP:0010097	abnormal retina blood vessel morphology	0.03192	10	192	PDE6B,FANCD2,STRN4,PLEKHA5,SGIP1,MILR1,ZNF718,RNF38,FGD5,CEP250	10	STRN4;FGD5;SGIP1;CEP250;RNF38;PDE6B	6	FANCD2;MILR1;PLEKHA5;ZNF718	4
HP:0033578	Pre-capillary pulmonary hypertension	0.03329	9	149	KIAA0319L,ACTC1,TCIRG1,TRRAP,FOXP1,IL6ST,GATA4,IRF5,BMPR2	9	KIAA0319L;ACTC1;FOXP1;TRRAP;BMPR2	5	IL6ST;IRF5;GATA4;TCIRG1	4
HP:0002092	Pulmonary arterial hypertension	0.03329	9	149	KIAA0319L,ACTC1,TCIRG1,TRRAP,FOXP1,IL6ST,GATA4,IRF5,BMPR2	9	KIAA0319L;ACTC1;FOXP1;TRRAP;BMPR2	5	IL6ST;IRF5;GATA4;TCIRG1	4
MP:0006208	lethality throughout fetal growth and development	0.03484	18	426	ACTC1,SSBP3,PICALM,PIK3CB,PITX2,CUL4B,APC,FOXP1,EIF3H,IL6ST,IFT140,INTU,GATA4,POGZ,BMPR2,ARHGEF7,SETD5,PIERCE1	18	FOXP1;ACTC1;POGZ;INTU;PITX2;PIK3CB;EIF3H;BMPR2;APC;IFT140;ARHGEF7;SETD5	12	CUL4B;IL6ST;PICALM;GATA4;PIERCE1;SSBP3	6
MP:0012382	abnormal blood cell physiology	0.04048	51	1511	HLA-DQB2,HLA-G,TCIRG1,PLA2G15,PICALM,MICU1,ADORA2A,MS4A2,PIK3CB,CXCL5,GPR132,MRE11,PMS2,WIPF1,MAP4K3,FPR2,MARCHF7,AQP9,MILR1,CRY2,KLRK1,SH2D1B,LACC1,FOXP1,SIGLEC11,IL6ST,PRPS2,GALC,TNFSF13,INPP5D,IRF5,ITGAD,CCDC88B,ITGB2,LILRB1,ELMO1,STK4,KSR1,BMPR2,DIAPH1,AGTPBP1,RAP1GDS1,GPR34,IL18BP,NR3C1,RFX5,LGALS2,PDIA6,CD22,TLE4,IL1RL1	51	PDIA6;CRY2;RAP1GDS1;AGTPBP1;INPP5D;LACC1;NR3C1;PIK3CB;BMPR2;KSR1;RFX5;FOXP1;MICU1;PRPS2;ADORA2A;DIAPH1	16	ITGB2;IL6ST;MILR1;IRF5;IL1RL1;SH2D1B;TNFSF13;ELMO1;GALC;AQP9;MRE11;TCIRG1;CCDC88B;MARCHF7;CXCL5;LACC1;LGALS2;CD22;WIPF1;STK4;MS4A2;SIGLEC11;PLA2G15;TLE4;PICALM;HLA-G;GPR34;LILRB1;FPR2;GPR132;KLRK1;ITGAD;MAP4K3;IL18BP;HLA-DQB2;PMS2	36
MP:0004363	stria vascularis degeneration	0.04499	2	13	SLC26A4,MPV17	2		0	SLC26A4;MPV17	2

## Sheet: GO
Class	ID	Name	PV	Hit Count in Query List	Hit Count in Genome	Hit in Query List	SIG (p<0.05)	Mapped	Count	UP in Exp	UP in Exp (count)	DOWN in Exp	DOWN in Exp (count)
GO: Biological Process	GO:0001568	blood vessel development	0.01026	37	1168	HLA-G,MEF2C,PIK3CB,HPGD,PITX2,PKM,FGF9,VAV3,AMOTL2,FKBP10,STAB2,COL15A1,ANXA2,PRCP,PDGFD,PRL,PLK2,SYTL2,GATA4,ITGB2,ELMO1,STK4,BMPR2,NFATC4,ARHGEF7,ARHGEF9,PXN,FGFBP1,THSD7A,NTRK2,RTN4,LAMA4,LPAR1,LGALS2,ADGRG6,LIPA,LPAR6	YES	ITGB2;NTRK2;PXN;COL15A1;THSD7A;PRL;MEF2C;PDGFD;VAV3;AMOTL2;GATA4;ARHGEF9;RTN4;ELMO1;FGFBP1;PIK3CB;PLK2;ANXA2;LGALS2;LIPA;LPAR6;PITX2;STAB2;HPGD;NFATC4;PKM;FKBP10;BMPR2;PRCP;LAMA4;HLA-G;SYTL2;LPAR1;ADGRG6;ARHGEF7;STK4;FGF9	37	ANXA2;NTRK2;PXN;COL15A1;FKBP10;VAV3;PITX2;PIK3CB;SYTL2;ADGRG6;LPAR6;AMOTL2;ARHGEF9;BMPR2;NFATC4;FGF9;ARHGEF7;RTN4	18	ITGB2;PXN;THSD7A;PRL;MEF2C;PDGFD;GATA4;ELMO1;FGFBP1;PLK2;LGALS2;LIPA;STAB2;HPGD;PKM;PRCP;LAMA4;HLA-G;LPAR1;STK4	20
GO: Biological Process	GO:0048514	blood vessel morphogenesis	0.008993	34	1042	HLA-G,PIK3CB,HPGD,PITX2,PKM,FGF9,VAV3,AMOTL2,FKBP10,STAB2,COL15A1,ANXA2,PRCP,PRL,PLK2,SYTL2,GATA4,ITGB2,ELMO1,STK4,BMPR2,NFATC4,ARHGEF7,ARHGEF9,PXN,FGFBP1,THSD7A,NTRK2,RTN4,LAMA4,LPAR1,LGALS2,ADGRG6,LPAR6	YES	ITGB2;NTRK2;PXN;COL15A1;THSD7A;PRL;VAV3;AMOTL2;GATA4;ARHGEF9;RTN4;ELMO1;FGFBP1;PIK3CB;PLK2;ANXA2;LGALS2;LPAR6;PITX2;STAB2;HPGD;NFATC4;PKM;FKBP10;BMPR2;PRCP;LAMA4;HLA-G;SYTL2;LPAR1;ADGRG6;ARHGEF7;STK4;FGF9	34	ANXA2;NTRK2;PXN;COL15A1;FKBP10;VAV3;PITX2;PIK3CB;SYTL2;ADGRG6;LPAR6;AMOTL2;ARHGEF9;BMPR2;NFATC4;FGF9;ARHGEF7;RTN4	18	PRCP;PLK2;ITGB2;PXN;ELMO1;LAMA4;THSD7A;PRL;FGFBP1;LGALS2;HLA-G;LPAR1;STAB2;HPGD;GATA4;PKM;STK4	17
GO: Biological Process	GO:0010942	positive regulation of cell death	0.0002805	34	842	KCTD13,SAP18,HLA-G,PICALM,MEF2C,ADORA2A,PIK3CB,HPGD,UNC13B,APBB2,APC,KLRK1,IGFBP3,AKR1C3,FOXP1,CTNNA1,CTSD,INPP5D,IRF5,ITGB2,LILRB1,STK3,STK4,NFATC4,ARHGEF7,TAF6,RAD9A,RARG,RET,NR3C1,LPAR1,LGALS2,DNAJA3,EIF5A	YES	ITGB2;MEF2C;STK3;IRF5;FOXP1;APBB2;UNC13B;TAF6;DNAJA3;PIK3CB;AKR1C3;EIF5A;KCTD13;INPP5D;LGALS2;HPGD;RET;RARG;RAD9A;APC;NFATC4;IGFBP3;ADORA2A;SAP18;CTSD;PICALM;HLA-G;NR3C1;LILRB1;LPAR1;CTNNA1;KLRK1;ARHGEF7;STK4	34	UNC13B;TAF6;DNAJA3;NFATC4;SAP18;ADORA2A;FOXP1;INPP5D;NR3C1;PIK3CB;AKR1C3;APC;APBB2;ARHGEF7;EIF5A	15	ITGB2;MEF2C;STK3;IRF5;KCTD13;LGALS2;HPGD;RET;RARG;RAD9A;IGFBP3;CTSD;PICALM;HLA-G;LILRB1;LPAR1;CTNNA1;KLRK1;STK4	19
GO: Biological Process	GO:0009967	positive regulation of signal transduction	0.0009932	60	1882	ELAPOR2,ABL2,PDE8A,TMOD2,RRAGB,MEF2C,ADORA2A,PIK3CB,MID1,OSBPL8,FGF9,AKT2,FTO,PIBF1,CXCL5,CCL4L1,FPR2,SORBS1,OR51E2,NPTN,RNF167,IGFBP3,SH2D1B,PDGFD,CAPRIN2,AKR1C3,FOXP1,CTNNA1,CTSD,PRDM15,PRL,IL6ST,SOX9,INTU,PLK2,GATA4,CNTN6,KIAA0319,STK3,STK4,KSR1,BMPR2,NFATC4,TAF6,RAB29,RAD9A,FGFBP1,RASGRF1,NTRK2,RTN4,RET,NR3C1,LPAR1,OPRK1,LEFTY2,EEF1D,LIPA,LPAR6,SORBS3,EIF5A	YES	NTRK2;ELAPOR2;NPTN;IL6ST;PRL;MEF2C;CAPRIN2;PDGFD;STK3;KSR1;GATA4;OSBPL8;AKT2;FOXP1;SH2D1B;RTN4;TMOD2;TAF6;CCL4L1;FGFBP1;PIK3CB;FTO;AKR1C3;RAB29;MID1;EIF5A;PLK2;CNTN6;SORBS3;CXCL5;EEF1D;LIPA;INTU;LPAR6;RET;PRDM15;OPRK1;RAD9A;NFATC4;IGFBP3;ADORA2A;ABL2;BMPR2;RRAGB;RASGRF1;CTSD;RNF167;SOX9;KIAA0319;NR3C1;LPAR1;FPR2;PIBF1;SORBS1;CTNNA1;PDE8A;OR51E2;LEFTY2;STK4;FGF9	60	NTRK2;ELAPOR2;NPTN;CAPRIN2;KSR1;AKT2;FOXP1;RTN4;TMOD2;TAF6;PIK3CB;FTO;AKR1C3;MID1;EIF5A;SORBS3;EEF1D;INTU;LPAR6;NFATC4;ADORA2A;ABL2;BMPR2;RNF167;NR3C1;SORBS1;OR51E2;FGF9	28	IL6ST;PRL;MEF2C;PDGFD;STK3;GATA4;OSBPL8;SH2D1B;CCL4L1;FGFBP1;RAB29;PLK2;CNTN6;CXCL5;LIPA;RET;PRDM15;RAD9A;IGFBP3;RRAGB;RASGRF1;CTSD;SOX9;KIAA0319;PIBF1;LPAR1;FPR2;CTNNA1;PDE8A;LEFTY2;STK4;OPRK1	32
GO: Biological Process	GO:0006468	protein phosphorylation	0.009079	53	1794	PCP4,ABL2,PDE8A,VRK3,MARK1,STK32B,OBSCN,MEF2C,ADORA2A,LONP1,EFEMP1,PIK3CB,OSBPL8,FGF9,AKT2,PIBF1,MRE11,CDC42BPA,MAP4K3,ANXA2,FPR2,APC,INPP5F,MYLK2,NPTN,AATK,IGFBP3,SH2D1B,PDGFD,CAPRIN2,LOC102724560,IL6ST,SOX9,PLK2,ERC1,GATA4,ITGB2,GFRA1,STK3,STK4,KSR1,BMPR2,PTPRO,SLC27A1,CCNL1,PXN,TAF6,NTRK2,RET,HIPK3,LEFTY2,DNAJA3,FXR1	YES	PCP4;ITGB2;NTRK2;PXN;NPTN;IL6ST;MEF2C;FXR1;PDGFD;CAPRIN2;CCNL1;STK3;KSR1;GATA4;OSBPL8;AKT2;SH2D1B;TAF6;DNAJA3;ERC1;LONP1;MYLK2;PIK3CB;MRE11;VRK3;PLK2;ANXA2;SLC27A1;PTPRO;LOC102724560;STK32B;OBSCN;RET;MARK1;APC;IGFBP3;ADORA2A;CDC42BPA;ABL2;BMPR2;INPP5F;EFEMP1;SOX9;PIBF1;FPR2;AATK;PDE8A;GFRA1;MAP4K3;HIPK3;LEFTY2;STK4;FGF9	53	PCP4;NTRK2;PXN;NPTN;CAPRIN2;KSR1;AKT2;TAF6;DNAJA3;LONP1;MYLK2;PIK3CB;ANXA2;OBSCN;APC;ABL2;ADORA2A;BMPR2;INPP5F;EFEMP1;AATK;GFRA1;HIPK3;MARK1;FGF9	25	ITGB2;PXN;IL6ST;MEF2C;FXR1;PDGFD;CCNL1;STK3;GATA4;OSBPL8;SH2D1B;ERC1;MRE11;VRK3;PLK2;SLC27A1;PTPRO;LOC102724560;STK32B;RET;IGFBP3;CDC42BPA;SOX9;PIBF1;FPR2;AATK;PDE8A;MAP4K3;LEFTY2;STK4	30
GO: Biological Process	GO:0042981	regulation of apoptotic process	0.001242	61	1939	PCP4,ABL2,KCTD13,SAP18,HLA-G,ACTC1,EYA2,TRRAP,MEF2C,ZRANB3,FANCD2,ADORA2A,PIK3CB,HPGD,AKT2,KDM6A,UNC13B,MRE11,APBB2,APC,MARCHF7,KLRK1,KIFAP3,IGFBP3,AKR1C3,FOXP1,LOC102724560,CTNNA1,CTSB,CTSD,PRL,IL6ST,SOX9,PLK2,INPP5D,GATA4,IRF5,LILRB1,SNX13,STK3,STK4,AREL1,NFATC4,ARHGEF7,ZPR1,CCNL1,TAF6,RAD9A,RARG,NTRK2,RTN4,HEATR1,RET,NR3C1,LPAR1,LGALS2,HIPK3,DNAJA3,ATAD3A,PAFAH2,EIF5A	YES	PCP4;SNX13;NTRK2;AREL1;IL6ST;ACTC1;PRL;MEF2C;ZPR1;CCNL1;STK3;IRF5;GATA4;AKT2;CTSB;TRRAP;APBB2;FOXP1;RTN4;UNC13B;TAF6;DNAJA3;FANCD2;PIK3CB;MRE11;AKR1C3;MARCHF7;EIF5A;PLK2;KCTD13;LOC102724560;INPP5D;PAFAH2;LGALS2;HPGD;RET;RARG;RAD9A;APC;NFATC4;IGFBP3;ADORA2A;ABL2;SAP18;KDM6A;CTSD;ZRANB3;SOX9;ATAD3A;HLA-G;NR3C1;LILRB1;KIFAP3;LPAR1;CTNNA1;KLRK1;HEATR1;HIPK3;ARHGEF7;STK4;EYA2	61	PCP4;SNX13;NTRK2;ACTC1;AKT2;CTSB;TRRAP;APBB2;FOXP1;RTN4;UNC13B;TAF6;DNAJA3;PIK3CB;AKR1C3;EIF5A;INPP5D;APC;NFATC4;ADORA2A;ABL2;SAP18;KDM6A;ZRANB3;ATAD3A;KIFAP3;NR3C1;HIPK3;ARHGEF7	29	AREL1;IL6ST;PRL;MEF2C;ZPR1;CCNL1;STK3;IRF5;GATA4;FANCD2;MRE11;MARCHF7;PLK2;KCTD13;LOC102724560;PAFAH2;LGALS2;HPGD;RET;RARG;RAD9A;IGFBP3;CTSD;ZRANB3;SOX9;HLA-G;LILRB1;LPAR1;CTNNA1;KLRK1;HEATR1;STK4;EYA2	33
GO: Biological Process	GO:0050673	epithelial cell proliferation	0.008909	23	631	MEF2C,ADORA2A,PIK3CB,FGF9,AMOTL2,WDR77,APC,OR51E2,IGFBP3,FOXP1,PRL,SOX9,INTU,STK3,STK4,BMPR2,TINF2,ARHGEF7,KDF1,FGFBP1,RASGRF1,RTN4,LIPA	YES	PRL;MEF2C;STK3;AMOTL2;KDF1;FOXP1;RTN4;TINF2;FGFBP1;PIK3CB;LIPA;WDR77;INTU;APC;IGFBP3;ADORA2A;BMPR2;RASGRF1;SOX9;OR51E2;ARHGEF7;STK4;FGF9	23	FOXP1;OR51E2;WDR77;INTU;PIK3CB;KDF1;BMPR2;AMOTL2;APC;FGF9;ARHGEF7;ADORA2A;RTN4	13	RASGRF1;TINF2;FGFBP1;PRL;LIPA;SOX9;MEF2C;STK3;IGFBP3;STK4	10
GO: Biological Process	GO:0030036	actin cytoskeleton organization	0.007283	30	876	CTTNBP2,ABL2,KCTD13,OBSCN,ACTC1,TMOD2,MEF2C,AMOTL2,CDC42BPA,WIPF1,ASAP3,SORBS1,SMTN,CTNNA1,MEGF10,PRPS2,IQSEC2,CLASP2,ELMO1,ARHGEF7,DIAPH1,PXN,FGD5,ESPN,RAP1GDS1,THSD7A,ARPIN-AP3S2,LPAR1,SORBS3,EPB41L2	YES	PXN;THSD7A;ACTC1;MEF2C;ARPIN-AP3S2;AMOTL2;MEGF10;CTTNBP2;TMOD2;IQSEC2;ELMO1;ESPN;ASAP3;KCTD13;SMTN;SORBS3;FGD5;CLASP2;OBSCN;WIPF1;PRPS2;ABL2;CDC42BPA;RAP1GDS1;EPB41L2;LPAR1;SORBS1;CTNNA1;ARHGEF7;DIAPH1	30	TMOD2;IQSEC2;SMTN;PXN;RAP1GDS1;SORBS3;ACTC1;FGD5;OBSCN;SORBS1;AMOTL2;PRPS2;ARHGEF7;ABL2;DIAPH1	15	KCTD13;PXN;ELMO1;EPB41L2;CTTNBP2;THSD7A;MEF2C;ARPIN-AP3S2;CLASP2;LPAR1;ASAP3;CTNNA1;MEGF10;WIPF1;ESPN;CDC42BPA	16
GO: Biological Process	GO:0001525	angiogenesis	0.01483	29	887	HLA-G,PIK3CB,PITX2,PKM,FGF9,VAV3,AMOTL2,STAB2,COL15A1,ANXA2,PRCP,PRL,PLK2,GATA4,ITGB2,ELMO1,STK4,BMPR2,NFATC4,ARHGEF7,ARHGEF9,PXN,FGFBP1,THSD7A,RTN4,LPAR1,LGALS2,ADGRG6,LPAR6	YES	ITGB2;PXN;COL15A1;THSD7A;PRL;VAV3;AMOTL2;GATA4;ARHGEF9;RTN4;ELMO1;FGFBP1;PIK3CB;PLK2;ANXA2;LGALS2;LPAR6;PITX2;STAB2;NFATC4;PKM;BMPR2;PRCP;HLA-G;LPAR1;ADGRG6;ARHGEF7;STK4;FGF9	29	ANXA2;PXN;COL15A1;VAV3;PITX2;PIK3CB;LPAR6;ADGRG6;BMPR2;AMOTL2;ARHGEF9;NFATC4;FGF9;ARHGEF7;RTN4	15	PRCP;PLK2;ITGB2;PXN;ELMO1;THSD7A;PRL;FGFBP1;LGALS2;HLA-G;LPAR1;STAB2;GATA4;PKM;STK4	15
GO: Biological Process	GO:0000902	cell morphogenesis	0.000665	47	1356	ABL2,KCTD13,SSBP3,PICALM,MEF2C,ADORA2A,GORASP1,AMOTL2,COL15A1,SYT3,APBB2,APC,CPNE5,NPTN,FEZ2,ASAH1,CAPRIN2,FOXP1,BCL9L,CLASP2,ITGB2,CNTN6,KIAA0319,STK4,PRDM8,BMPR2,KCNC3,PTPRO,NFATC4,ARHGEF7,DIAPH1,PXN,FGD5,ESPN,LST1,THSD7A,NSF,NTRK2,RTN4,ARPIN-AP3S2,LAMA4,RET,PIAS2,LPAR1,ADGRG6,LIPA,EPB41L2	YES	ITGB2;NTRK2;PXN;NPTN;COL15A1;THSD7A;MEF2C;ARPIN-AP3S2;PIAS2;CAPRIN2;AMOTL2;FOXP1;APBB2;RTN4;NSF;FEZ2;ESPN;KCTD13;CPNE5;CNTN6;PTPRO;FGD5;LIPA;CLASP2;SYT3;RET;KCNC3;APC;NFATC4;ADORA2A;ABL2;BMPR2;EPB41L2;LAMA4;GORASP1;BCL9L;PICALM;PRDM8;KIAA0319;LPAR1;ADGRG6;LST1;ASAH1;SSBP3;ARHGEF7;STK4;DIAPH1	47	NTRK2;PXN;NPTN;COL15A1;CAPRIN2;AMOTL2;FOXP1;APBB2;RTN4;FEZ2;CPNE5;FGD5;APC;NFATC4;ABL2;ADORA2A;BMPR2;BCL9L;ADGRG6;ARHGEF7;DIAPH1	21	ITGB2;PXN;THSD7A;MEF2C;ARPIN-AP3S2;PIAS2;NSF;ESPN;KCTD13;CNTN6;PTPRO;LIPA;CLASP2;SYT3;RET;KCNC3;STK4;EPB41L2;LAMA4;GORASP1;PICALM;KIAA0319;LPAR1;LST1;ASAH1;SSBP3;PRDM8	27
GO: Cellular Component	GO:0015630	microtubule cytoskeleton	0.03885	42	1489	MARK1,CCDC178,EFHB,MID1,PIBF1,WDR44,EPS8L2,KNSTRN,OFCC1,APC,SORBS1,YWHAE,SMTN,KIFAP3,CAPRIN2,CCDC181,IFT140,INTU,PLK2,LRRC45,ERC1,EML2,CLASP2,CCDC88B,CCDC66,SYNJ2,ARHGEF7,DIAPH1,PXN,KDF1,PYCR3,RPGRIP1L,DIDO1,NR3C1,PRC1,KLC4,RMDN3,CEP89,PIERCE1,CEP250,DNAI4,RPGR	YES	CCDC178;PYCR3;PXN;SYNJ2;CAPRIN2;KDF1;PIERCE1;YWHAE;IFT140;KLC4;ERC1;CEP89;KNSTRN;RPGRIP1L;OFCC1;CCDC88B;DIDO1;EPS8L2;MID1;PLK2;CCDC181;DNAI4;SMTN;PRC1;CCDC66;CLASP2;INTU;RMDN3;MARK1;APC;LRRC45;RPGR;EML2;EFHB;KIFAP3;NR3C1;PIBF1;CEP250;SORBS1;WDR44;ARHGEF7;DIAPH1	42	PXN;SYNJ2;CAPRIN2;KDF1;ARHGEF7;IFT140;RPGRIP1L;EPS8L2;MID1;CCDC181;SMTN;PRC1;INTU;APC;EML2;KIFAP3;NR3C1;CEP250;SORBS1;MARK1;DIAPH1	21	CCDC178;PYCR3;PXN;PIERCE1;YWHAE;KLC4;ERC1;CEP89;KNSTRN;OFCC1;CCDC88B;DIDO1;PLK2;DNAI4;CCDC66;CLASP2;RMDN3;LRRC45;RPGR;EFHB;PIBF1;WDR44	22
GO: Cellular Component	GO:0098590	plasma membrane region	3.364e-06	61	1565	PDE6B,SLC26A4,HLA-G,TCIRG1,PICALM,ADORA2A,AP2A2,PIK3CB,HPGD,UPK1B,AKT2,AMOTL2,UNC13B,EPS8L2,SGIP1,COMT,SYT3,ANXA2,APC,CLDND1,NBEA,SORBS1,INPP5F,AQP9,KIFAP3,NPTN,SLC14A1,RIMS4,NSG1,AKR1C3,CTNNA1,CTSB,SLC26A10P,ERC1,IQSEC2,CLASP2,ITGB2,CNTN6,KSR1,BMPR2,KCNC3,SYNJ2,PTPRO,SLC27A1,KCNK1,DIAPH1,FGD5,IQCE,CA11,RASGRF1,AMN1,DTNB,SYNE1,NTRK2,RTN4,SLC7A7,LPAR1,OPRK1,DNAJA3,CYP4F3,OSMR	YES	ITGB2;NTRK2;IQCE;NPTN;SYNJ2;KCNK1;KSR1;AMOTL2;AKT2;CTSB;OSMR;AP2A2;RTN4;UNC13B;IQSEC2;DNAJA3;ERC1;UPK1B;SLC14A1;RIMS4;PIK3CB;COMT;AQP9;CLDND1;TCIRG1;AKR1C3;EPS8L2;PDE6B;ANXA2;SLC27A1;CNTN6;PTPRO;FGD5;CLASP2;SYT3;DTNB;HPGD;KCNC3;OPRK1;SYNE1;APC;SLC7A7;SLC26A10P;ADORA2A;CYP4F3;BMPR2;AMN1;INPP5F;RASGRF1;SLC26A4;SGIP1;PICALM;HLA-G;KIFAP3;LPAR1;SORBS1;NBEA;CTNNA1;NSG1;CA11;DIAPH1	61	NTRK2;NPTN;SYNJ2;KSR1;AMOTL2;AKT2;CTSB;OSMR;RTN4;UNC13B;IQSEC2;DNAJA3;PIK3CB;COMT;CLDND1;AKR1C3;EPS8L2;PDE6B;ANXA2;FGD5;APC;SLC26A10P;ADORA2A;BMPR2;AMN1;INPP5F;SGIP1;KIFAP3;SORBS1;NBEA;NSG1;CA11;DIAPH1	33	ITGB2;IQCE;KCNK1;AP2A2;ERC1;UPK1B;SLC14A1;RIMS4;AQP9;TCIRG1;SLC27A1;CNTN6;PTPRO;CLASP2;SYT3;DTNB;HPGD;KCNC3;SYNE1;SLC7A7;CYP4F3;RASGRF1;SLC26A4;PICALM;HLA-G;LPAR1;CTNNA1;NSG1;OPRK1	29
GO: Cellular Component	GO:0005768	endosome	8.371e-05	45	1162	HLA-DQB2,HLA-G,VPS26C,TCIRG1,EIPR1,PLD3,PICALM,COMMD1,MS4A2,AP2A2,TBC1D14,AKT2,MME,AMOTL2,WDR44,SGIP1,SYT3,ANXA2,APBB2,INPP5F,OR51E2,RNF167,ASAH1,NSG1,CTSB,CTSD,PRL,VPS11,ATP6V0A1,SNX20,GFRA1,SNX13,KIAA0319,VOPP1,RAB4B,RABGAP1L,KCNK1,FGD5,RAB29,NTRK2,VPS8,RET,LPAR1,CD22,VPS53	YES	SNX13;NTRK2;PRL;KCNK1;AMOTL2;AKT2;CTSB;APBB2;AP2A2;VPS8;RAB4B;PLD3;VPS26C;EIPR1;TCIRG1;RAB29;ANXA2;SNX20;FGD5;SYT3;CD22;RET;RABGAP1L;MS4A2;VOPP1;MME;INPP5F;CTSD;ATP6V0A1;TBC1D14;SGIP1;PICALM;HLA-G;COMMD1;KIAA0319;LPAR1;RNF167;VPS53;VPS11;WDR44;ASAH1;NSG1;GFRA1;OR51E2;HLA-DQB2	45	MME;SNX13;NTRK2;ANXA2;INPP5F;FGD5;SGIP1;RNF167;COMMD1;APBB2;VPS8;AMOTL2;AKT2;CTSB;NSG1;GFRA1;OR51E2;VOPP1	18	PRL;KCNK1;AP2A2;RAB4B;PLD3;VPS26C;EIPR1;TCIRG1;RAB29;SNX20;SYT3;CD22;RET;RABGAP1L;MS4A2;CTSD;ATP6V0A1;TBC1D14;PICALM;HLA-G;KIAA0319;VPS53;LPAR1;VPS11;WDR44;ASAH1;NSG1;HLA-DQB2	28
GO: Cellular Component	GO:0031252	cell leading edge	0.0001001	25	507	ABL2,ACTC1,ADORA2A,AKT2,EPS8L2,CDC42BPA,WIPF1,ANXA2,KNSTRN,ASAP3,APBB2,APC,PABPC1,CTNNA1,CLASP2,KSR1,KCNC3,SYNJ2,PTPRO,ARHGEF7,DIAPH1,PXN,FGD5,KDF1,ARPIN-AP3S2	YES	PXN;ACTC1;ARPIN-AP3S2;SYNJ2;KSR1;AKT2;KDF1;APBB2;KNSTRN;EPS8L2;ASAP3;PABPC1;ANXA2;PTPRO;FGD5;CLASP2;KCNC3;APC;WIPF1;ABL2;ADORA2A;CDC42BPA;CTNNA1;ARHGEF7;DIAPH1	25	EPS8L2;ANXA2;PXN;ABL2;ACTC1;FGD5;SYNJ2;KDF1;KSR1;AKT2;APC;APBB2;ARHGEF7;ADORA2A;DIAPH1	15	PXN;PTPRO;ARPIN-AP3S2;CLASP2;KNSTRN;KCNC3;CTNNA1;WIPF1;ASAP3;PABPC1;CDC42BPA	11
GO: Cellular Component	GO:0030426	growth cone	0.00105	14	251	TMOD2,APBB2,APC,YWHAE,LRRC45,CLASP2,PTPRO,ARHGEF7,ZPR1,RASGRF1,NTRK2,RTN4,CRTAC1,FXR1	YES	TMOD2;NTRK2;LRRC45;PTPRO;RASGRF1;CLASP2;ZPR1;FXR1;CRTAC1;APC;YWHAE;APBB2;ARHGEF7;RTN4	14	TMOD2;NTRK2;CRTAC1;APC;APBB2;ARHGEF7;RTN4	7	PTPRO;RASGRF1;ZPR1;CLASP2;FXR1;YWHAE;LRRC45	7
GO: Cellular Component	GO:0005667	transcription regulator complex	0.005816	23	606	SAP18,SSBP3,TRRAP,MEF2C,PITX2,ANXA2,DRAP1,CRY2,PRDM16,SOX9,BCL9L,SP3,GATA4,PSMC5,NFATC4,TAF6,NPAS2,RARG,RFX5,GMNN,GTF2H3,BRF1,TLE4	YES	PSMC5;MEF2C;GATA4;TRRAP;GTF2H3;TAF6;GMNN;SP3;RFX5;ANXA2;CRY2;BRF1;PITX2;DRAP1;RARG;PRDM16;NFATC4;SAP18;TLE4;NPAS2;BCL9L;SOX9;SSBP3	23	TAF6;ANXA2;CRY2;SAP18;GMNN;PSMC5;NPAS2;BCL9L;PITX2;DRAP1;SP3;RFX5;PRDM16;TRRAP;NFATC4;GTF2H3	16	TLE4;MEF2C;SOX9;BRF1;RARG;GATA4;SSBP3	7
GO: Cellular Component	GO:0005925	focal adhesion	0.0121	17	433	ZNF384,ACTC1,RPS17,MME,ASAP3,SORBS1,PABPC1,YWHAE,CTNNA1,CLASP2,ITGB2,ARHGEF7,PXN,SORBS3,IL1RL1,RPL6,EPB41L2	YES	MME;ITGB2;PXN;SORBS3;EPB41L2;ACTC1;CLASP2;RPL6;ZNF384;SORBS1;ASAP3;CTNNA1;RPS17;YWHAE;IL1RL1;ARHGEF7;PABPC1	17	MME;PXN;SORBS3;ACTC1;ZNF384;SORBS1;ARHGEF7	7	ITGB2;PXN;EPB41L2;CLASP2;RPL6;ASAP3;CTNNA1;RPS17;YWHAE;IL1RL1;PABPC1	11
GO: Cellular Component	GO:0030055	cell-substrate junction	0.01545	17	445	ZNF384,ACTC1,RPS17,MME,ASAP3,SORBS1,PABPC1,YWHAE,CTNNA1,CLASP2,ITGB2,ARHGEF7,PXN,SORBS3,IL1RL1,RPL6,EPB41L2	YES	MME;ITGB2;PXN;SORBS3;EPB41L2;ACTC1;CLASP2;RPL6;ZNF384;SORBS1;ASAP3;CTNNA1;RPS17;YWHAE;IL1RL1;ARHGEF7;PABPC1	17	MME;PXN;SORBS3;ACTC1;ZNF384;SORBS1;ARHGEF7	7	ITGB2;PXN;EPB41L2;CLASP2;RPL6;ASAP3;CTNNA1;RPS17;YWHAE;IL1RL1;PABPC1	11
GO: Cellular Component	GO:0099512	supramolecular fiber	0.01835	36	1173	PCP4,OBSCN,ACTC1,TMOD2,EFHB,MEF2C,ADORA2A,MID1,AMOTL2,WDR44,WIPF1,KNSTRN,APC,MYLK2,SMTN,KIFAP3,CCDC181,VPS11,INPP5D,EML2,CLASP2,CCDC66,SYNJ2,DIAPH1,ESPN,KRT10,RPGRIP1L,KRT17,SYNE1,PRC1,KLC4,DNAJA3,RMDN3,FXR1,PIERCE1,RPL6	YES	PCP4;ACTC1;MEF2C;FXR1;SYNJ2;AMOTL2;PIERCE1;TMOD2;DNAJA3;KLC4;KNSTRN;MYLK2;RPGRIP1L;KRT17;ESPN;MID1;CCDC181;SMTN;KRT10;INPP5D;PRC1;CCDC66;CLASP2;OBSCN;RPL6;RMDN3;SYNE1;WIPF1;APC;ADORA2A;EML2;EFHB;KIFAP3;VPS11;WDR44;DIAPH1	36	PCP4;ACTC1;SYNJ2;AMOTL2;TMOD2;DNAJA3;MYLK2;RPGRIP1L;MID1;CCDC181;SMTN;KRT10;INPP5D;PRC1;OBSCN;APC;ADORA2A;EML2;KIFAP3;DIAPH1	20	KLC4;MEF2C;EFHB;CLASP2;CCDC66;KNSTRN;RPL6;FXR1;RMDN3;VPS11;KRT17;WDR44;SYNE1;WIPF1;PIERCE1;ESPN	16
GO: Cellular Component	GO:0098552	side of membrane	0.03542	26	835	HLA-DQB2,HLA-G,RPS17,SERPINE2,MS4A2,AP2A2,ASPSCR1,OTULINL,STAB2,KLRK1,THADA,RASAL3,CTSB,IL6ST,TNFSF13,ITGAD,ITGB2,LILRB1,GFRA1,DTNA,GSR,TGM3,CD22,IL1RL1,OSMR,RPL6	YES	ITGB2;IL6ST;CTSB;OSMR;IL1RL1;AP2A2;TNFSF13;OTULINL;DTNA;SERPINE2;THADA;TGM3;RPL6;CD22;GSR;STAB2;RASAL3;RPS17;MS4A2;HLA-G;LILRB1;KLRK1;ITGAD;GFRA1;ASPSCR1;HLA-DQB2	26	OSMR;DTNA;THADA;CTSB;GFRA1	5	ITGB2;IL6ST;AP2A2;IL1RL1;TNFSF13;OTULINL;SERPINE2;TGM3;RPL6;CD22;GSR;STAB2;RPS17;RASAL3;MS4A2;HLA-G;LILRB1;KLRK1;ITGAD;ASPSCR1;HLA-DQB2	21
GO: Molecular Function	GO:0050839	cell adhesion molecule binding	0.002121	25	600	OBSCN,PICALM,PKM,MRE11,EPS8L2,ANXA2,APC,YWHAE,NPTN,CTNNA1,ERC1,ITGAD,ITGB2,LILRB1,GFRA1,CNTN6,BMPR2,PTPRO,PXN,MPP7,RTN4,EEF1D,TBC1D10A,RPL6,HDLBP	YES	ITGB2;PXN;NPTN;HDLBP;YWHAE;RTN4;TBC1D10A;ERC1;MRE11;EPS8L2;ANXA2;CNTN6;PTPRO;EEF1D;OBSCN;RPL6;APC;PKM;BMPR2;MPP7;PICALM;LILRB1;CTNNA1;ITGAD;GFRA1	25	MPP7;PXN;ANXA2;NPTN;EEF1D;OBSCN;BMPR2;HDLBP;EPS8L2;APC;GFRA1;RTN4	12	ITGB2;TBC1D10A;PXN;CNTN6;PTPRO;ERC1;PICALM;RPL6;LILRB1;YWHAE;MRE11;CTNNA1;ITGAD;PKM	14
GO: Molecular Function	GO:0030695	GTPase regulator activity	0.001151	23	510	OBSCN,TBC1D14,VAV3,TBC1D15,EPS8L2,ASAP3,RNF167,RASAL3,IQSEC2,ELMO1,ARHGEF7,RABGAP1L,ARHGEF9,FGD5,RAP1GDS1,RASGRF1,ARHGEF12,RGS10,DNAJA3,EEF1D,TBC1D10A,RPGR,ARHGAP19	YES	TBC1D15;VAV3;ARHGEF9;ARHGEF12;IQSEC2;TBC1D10A;DNAJA3;ELMO1;EPS8L2;ASAP3;RGS10;EEF1D;FGD5;OBSCN;RABGAP1L;RASAL3;RPGR;ARHGAP19;RAP1GDS1;RASGRF1;TBC1D14;RNF167;ARHGEF7	23	IQSEC2;DNAJA3;RAP1GDS1;EEF1D;FGD5;RNF167;OBSCN;VAV3;ARHGEF9;EPS8L2;ARHGEF7	11	TBC1D10A;ARHGAP19;RPGR;ELMO1;RGS10;RASGRF1;TBC1D14;TBC1D15;RABGAP1L;RASAL3;ARHGEF12;ASAP3	12
GO: Molecular Function	GO:0019900	kinase binding	0.03759	30	957	PDE8A,MS4A2,AP2A2,TBC1D14,FBXW5,AKT2,APC,NBEA,SORBS1,CRY2,KLRK1,NRG3,SOX9,PLK2,GATA4,IRF5,CLASP2,ITGB2,KSR1,BMPR2,ARHGEF7,ZPR1,PXN,RAD9A,RASGRF1,NSF,NTRK2,NR3C1,PRC1,DNAJA3	YES	ITGB2;NTRK2;PXN;FBXW5;ZPR1;KLRK1;IRF5;KSR1;GATA4;AKT2;AP2A2;DNAJA3;NSF;PLK2;CRY2;PRC1;CLASP2;RAD9A;APC;MS4A2;BMPR2;RASGRF1;TBC1D14;SOX9;NR3C1;SORBS1;NBEA;PDE8A;NRG3;ARHGEF7	30	DNAJA3;NTRK2;PXN;CRY2;PRC1;FBXW5;NR3C1;SORBS1;NBEA;KSR1;AKT2;APC;NRG3;ARHGEF7;BMPR2	15	PDE8A;ITGB2;PLK2;PXN;RASGRF1;NSF;TBC1D14;CLASP2;SOX9;ZPR1;IRF5;GATA4;RAD9A;KLRK1;AP2A2;MS4A2	16
GO: Molecular Function	GO:0005078	MAP-kinase scaffold activity	0.03766	2	14	KSR1,PXN	YES	PXN;KSR1	2	PXN;KSR1	2	PXN	1
GO: Molecular Function	GO:0045296	cadherin binding	0.0007015	18	342	OBSCN,PICALM,PKM,MRE11,EPS8L2,ANXA2,APC,YWHAE,CTNNA1,ERC1,BMPR2,PTPRO,MPP7,RTN4,EEF1D,TBC1D10A,RPL6,HDLBP	YES	MPP7;TBC1D10A;ANXA2;PTPRO;ERC1;EEF1D;OBSCN;PICALM;RPL6;BMPR2;MRE11;HDLBP;CTNNA1;EPS8L2;APC;YWHAE;PKM;RTN4	18	MPP7;ANXA2;EEF1D;OBSCN;BMPR2;HDLBP;EPS8L2;APC;RTN4	9	TBC1D10A;PTPRO;ERC1;PICALM;RPL6;MRE11;CTNNA1;YWHAE;PKM	9
GO: Molecular Function	GO:0008092	cytoskeletal protein binding	0.0008742	42	1135	CTTNBP2,ABL2,MARK1,OBSCN,ACTC1,TMOD2,PICALM,ADORA2A,MID1,EPS8L2,SGIP1,WIPF1,ANXA2,KNSTRN,APC,SORBS1,MYLK2,SMTN,KIFAP3,CTNNA1,CCDC181,CACYBP,EML2,CLASP2,CCDC88B,CCDC66,ARHGEF7,DIAPH1,PXN,RAB29,WIPF2,AGTPBP1,ADSS1,ESPN,KRT10,SYNE1,PRC1,KLC4,RGS10,RMDN3,SORBS3,EPB41L2	YES	ADSS1;PXN;ACTC1;CACYBP;CTTNBP2;TMOD2;KLC4;WIPF2;KNSTRN;MYLK2;CCDC88B;EPS8L2;RAB29;ESPN;MID1;CCDC181;SMTN;ANXA2;KRT10;RGS10;PRC1;SORBS3;CCDC66;CLASP2;OBSCN;RMDN3;MARK1;SYNE1;WIPF1;APC;ADORA2A;ABL2;EML2;AGTPBP1;EPB41L2;SGIP1;PICALM;KIFAP3;SORBS1;CTNNA1;ARHGEF7;DIAPH1	42	PXN;ACTC1;CACYBP;TMOD2;MYLK2;EPS8L2;MID1;CCDC181;SMTN;ANXA2;KRT10;SORBS3;PRC1;OBSCN;MARK1;APC;ABL2;ADORA2A;EML2;AGTPBP1;SGIP1;KIFAP3;SORBS1;ARHGEF7;DIAPH1	25	ADSS1;CCDC88B;KLC4;PXN;RGS10;WIPF2;CTTNBP2;EPB41L2;CCDC66;CLASP2;PICALM;KNSTRN;RMDN3;CTNNA1;SYNE1;WIPF1;RAB29;ESPN	18
GO: Molecular Function	GO:0005102	signaling receptor binding	0.000926	59	1756	ELAPOR2,MARK1,HLA-G,PICALM,ADORA2A,SERPINE2,EFEMP1,COMMD1,FGF9,VAV3,PIBF1,CXCL5,CCL4L1,FPR2,SORBS1,KLRK1,SNED1,NPTN,IGFBP1,PDGFD,NSG1,CAPRIN2,NRG3,PRL,MEGF10,IL6ST,TNFSF13,SYTL2,PSMC5,EML2,ITGAD,ITGB2,LILRB1,GFRA1,CGB1,CGB2,NFATC4,ZPR1,DIAPH1,PXN,TAC3,TAF6,RPGRIP1L,RASGRF1,NSF,NTRK2,ARHGEF12,LAMA4,IL18BP,NR3C1,OPRK1,LHB,LEFTY2,DNAJA3,CGB8,CD22,ASXL3,OSMR,GKN1	YES	ITGB2;NTRK2;ELAPOR2;NPTN;PXN;IL6ST;CGB8;PRL;PSMC5;ZPR1;LHB;CAPRIN2;PDGFD;VAV3;MEGF10;ARHGEF12;OSMR;DIAPH1;TNFSF13;DNAJA3;TAF6;NSG1;CCL4L1;NSF;SERPINE2;RPGRIP1L;CGB1;GKN1;CGB2;ITGAD;ASXL3;CXCL5;LEFTY2;CD22;OPRK1;MARK1;NFATC4;ADORA2A;IGFBP1;EML2;RASGRF1;EFEMP1;TAC3;LAMA4;PICALM;HLA-G;COMMD1;NR3C1;LILRB1;SYTL2;FPR2;SNED1;SORBS1;PIBF1;KLRK1;NRG3;GFRA1;IL18BP;FGF9	59	NTRK2;ELAPOR2;NPTN;PXN;CGB8;PSMC5;LHB;CAPRIN2;VAV3;OSMR;TAF6;DNAJA3;NSG1;RPGRIP1L;CGB1;CGB2;NFATC4;ADORA2A;EML2;EFEMP1;COMMD1;NR3C1;SYTL2;SORBS1;NRG3;GFRA1;FGF9;MARK1;DIAPH1	29	ITGB2;PXN;IL6ST;PRL;ZPR1;PDGFD;MEGF10;ARHGEF12;TNFSF13;CCL4L1;NSF;SERPINE2;GKN1;ITGAD;ASXL3;CXCL5;LEFTY2;CD22;IGFBP1;RASGRF1;LAMA4;TAC3;PICALM;HLA-G;LILRB1;PIBF1;FPR2;SNED1;KLRK1;NSG1;IL18BP;OPRK1	32
GO: Molecular Function	GO:0030971	receptor tyrosine kinase binding	0.01303	6	87	NRG3,ZPR1,RASGRF1,NTRK2,NR3C1,DNAJA3	YES	DNAJA3;NTRK2;RASGRF1;ZPR1;NR3C1;NRG3	6	NRG3;DNAJA3;NTRK2;NR3C1	4	ZPR1;RASGRF1	2
GO: Molecular Function	GO:0051219	phosphoprotein binding	0.01576	7	117	ABL2,MS4A2,MID1,PITX2,YWHAE,SHF,SH2D1B	YES	MS4A2;PITX2;SHF;YWHAE;SH2D1B;MID1;ABL2	7	PITX2;SHF;MID1;ABL2	4	YWHAE;SH2D1B;MS4A2	3
GO: Molecular Function	GO:0008134	transcription factor binding	0.0222	26	766	SAP18,MEF2C,PITX2,APBB2,DRAP1,CRY2,ASAH1,FOXP1,PRDM16,CRTC2,SOX9,SP3,GATA4,PSMC5,PSMD9,STK4,NFATC4,TAF6,RARG,PIAS2,GMNN,DNAJA3,EEF1D,BRF1,TLE4,SORBS3	YES	PSMC5;MEF2C;PIAS2;GATA4;FOXP1;APBB2;TAF6;DNAJA3;GMNN;SP3;CRY2;SORBS3;EEF1D;PSMD9;BRF1;PITX2;DRAP1;RARG;PRDM16;NFATC4;SAP18;TLE4;CRTC2;SOX9;ASAH1;STK4	26	TAF6;DNAJA3;NFATC4;SAP18;CRY2;SORBS3;GMNN;FOXP1;EEF1D;PSMC5;PITX2;DRAP1;SP3;PRDM16;APBB2	15	TLE4;MEF2C;CRTC2;PSMD9;SOX9;PIAS2;BRF1;RARG;GATA4;ASAH1;STK4	11

## Sheet: pathway
Category	ID	Name	p-value	Hit Count in Query List	Hit Count in Genome	Hit in Query List	SIG (p<0.05)	Mapped	Count	UP in Exp	UP in Exp (count)	DOWN in Exp	DOWN in Exp (count)
Pathway	MM14813	SIGNALING BY HIPPO	0.001242	4	20	AMOTL2,YWHAE,STK3,STK4	YES	YWHAE;STK3;AMOTL2;STK4	4	AMOTL2	1	YWHAE;STK3;STK4	3
Pathway	M27870	SIGNALING BY RECEPTOR TYROSINE KINASES	0.002273	24	522	VRK3,TCIRG1,MEF2C,ADORA2A,AP2A2,PIK3CB,FGF9,AKT2,VAV3,COL4A4,PDGFD,CTNNA1,NRG3,CTSD,ATP6V0A1,ELMO1,RAB4B,PTPRO,ARHGEF7,DIAPH1,PXN,FGFBP1,NTRK2,LAMA4	YES	NTRK2;PXN;MEF2C;PDGFD;VAV3;AKT2;AP2A2;RAB4B;ELMO1;FGFBP1;PIK3CB;TCIRG1;VRK3;PTPRO;ADORA2A;CTSD;LAMA4;ATP6V0A1;CTNNA1;NRG3;FGF9;ARHGEF7;COL4A4;DIAPH1	24	NTRK2;PXN;VAV3;PIK3CB;AKT2;NRG3;FGF9;ARHGEF7;ADORA2A;DIAPH1	10	VRK3;PXN;RAB4B;ELMO1;PTPRO;CTSD;LAMA4;ATP6V0A1;FGFBP1;MEF2C;PDGFD;TCIRG1;CTNNA1;AP2A2;COL4A4	15
Pathway	MM14746	P75 NTR RECEPTOR MEDIATED SIGNALLING	0.004711	7	85	OBSCN,VAV3,YWHAE,ARHGEF7,ARHGEF9,RTN4,ARHGEF12	YES	OBSCN;VAV3;ARHGEF9;YWHAE;ARHGEF12;ARHGEF7;RTN4	7	OBSCN;VAV3;ARHGEF9;ARHGEF7;RTN4	5	YWHAE;ARHGEF12	2
Pathway	M18306	REGULATION OF ACTIN CYTOSKELETON	0.006179	12	213	PIK3CB,FGF9,VAV3,APC,MYLK2,PDGFD,ITGAD,ITGB2,ARHGEF7,DIAPH1,PXN,ARHGEF12	YES	ITGB2;PXN;DIAPH1;PDGFD;MYLK2;PIK3CB;VAV3;APC;ITGAD;ARHGEF12;ARHGEF7;FGF9	12	PXN;VAV3;MYLK2;PIK3CB;APC;FGF9;ARHGEF7;DIAPH1	8	ITGB2;PXN;PDGFD;ITGAD;ARHGEF12	5
Pathway	MM14824	CELL DEATH SIGNALLING VIA NRAGE NRIF AND NADE	0.007165	6	70	OBSCN,VAV3,YWHAE,ARHGEF7,ARHGEF9,ARHGEF12	YES	OBSCN;VAV3;ARHGEF9;YWHAE;ARHGEF12;ARHGEF7	6	OBSCN;ARHGEF7;ARHGEF9;VAV3	4	YWHAE;ARHGEF12	2
Pathway	M7253	FOCAL ADHESION	0.02446	10	199	PIK3CB,AKT2,VAV3,COL4A4,MYLK2,PDGFD,DIAPH1,PXN,RASGRF1,LAMA4	YES	PXN;RASGRF1;LAMA4;PDGFD;MYLK2;PIK3CB;VAV3;AKT2;COL4A4;DIAPH1	10	PXN;VAV3;MYLK2;PIK3CB;AKT2;DIAPH1	6	PXN;RASGRF1;LAMA4;PDGFD;COL4A4	5
Pathway	MM15018	METABOLISM OF PROTEINS	0.02721	54	1708	RPS17,ADORA2A,MGAT1,COMMD1,UBE2H,GORASP1,FBXW5,MME,UBE2E3,EIF3M,CUL4B,APC,CPA3,PABPC1,ARCN1,GFM2,IGFBP1,IGFBP3,PPA2,EIF3C,EIF3H,CTSD,GALNT15,SP3,LYPD6B,PSMC5,PSMC6,PSMD9,COPS7A,SEC24D,LMAN2L,RAB4B,CGB1,FBXO4,CGB2,ST8SIA6,H4C16,CHRDL1,ANKRD28,RAB29,PLA2G7,THSD7A,NUP107,NSF,FN3KRP,NR3C1,PIAS2,GSPT1,LHB,EEF1D,PDIA6,CGB8,EIF5A,RPL6	YES	GSPT1;COPS7A;THSD7A;CGB8;FBXW5;PSMC5;PIAS2;LHB;NUP107;ANKRD28;SEC24D;MGAT1;UBE2H;H4C16;RAB4B;EIF3M;NSF;GFM2;SP3;CGB1;FBXO4;CGB2;RAB29;EIF5A;PABPC1;FN3KRP;LMAN2L;EEF1D;PSMD9;RPL6;GALNT15;APC;RPS17;EIF3C;IGFBP3;ADORA2A;IGFBP1;MME;ARCN1;PDIA6;LYPD6B;PLA2G7;CTSD;PSMC6;CHRDL1;GORASP1;COMMD1;NR3C1;UBE2E3;PPA2;EIF3H;CUL4B;CPA3;ST8SIA6	54	GSPT1;COPS7A;CGB8;FBXW5;PSMC5;LHB;SEC24D;UBE2H;GFM2;SP3;CGB1;FBXO4;CGB2;EIF5A;LMAN2L;EEF1D;APC;ADORA2A;MME;PDIA6;PSMC6;COMMD1;NR3C1;UBE2E3;EIF3H;ST8SIA6	26	THSD7A;PIAS2;NUP107;ANKRD28;MGAT1;H4C16;RAB4B;EIF3M;NSF;RAB29;PABPC1;FN3KRP;PSMD9;RPL6;GALNT15;RPS17;EIF3C;IGFBP3;IGFBP1;ARCN1;LYPD6B;CTSD;CHRDL1;GORASP1;PPA2;PLA2G7;CUL4B;CPA3	28
Pathway	MM14752	SIGNALING BY VEGF	0.04036	6	103	PIK3CB,AKT2,VAV3,CTNNA1,ELMO1,PXN	YES	PXN;ELMO1;VAV3;PIK3CB;CTNNA1;AKT2	6	VAV3;PIK3CB;PXN;AKT2	4	PXN;ELMO1;CTNNA1	3
Pathway	M29742	SIGNALING BY PTK6	0.04253	4	54	NRG3,ELMO1,PXN,NR3C1	YES	NRG3;PXN;ELMO1;NR3C1	4	NRG3;PXN;NR3C1	3	PXN;ELMO1	2
Pathway	M46422	TRANSCRIPTIONAL REGULATION BY NPAS4	0.04947	3	34	PLK2,RET,NR3C1	YES	PLK2;RET;NR3C1	3	NR3C1	1	PLK2;RET	2
